# Highly multiplexed immunofluorescence imaging of human tissues and tumors using t-CyCIF and conventional optical microscopes

Jia-Ren Lin<sup>\*1,2</sup>, Benjamin Izar<sup>1,2,3,4\*</sup>, Shu Wang<sup>1</sup>, Clarence Yapp<sup>1</sup>, Shaolin Mei<sup>1,3</sup>, Parin Shah<sup>3</sup>, Sandro Santagata,<sup>1,2,5,6</sup> and Peter K Sorger<sup>1,2</sup>

\*These authors contributed equally to this work.

<sup>1</sup>Laboratory of Systems Pharmacology

<sup>2</sup>Ludwig Center for Cancer Research at Harvard

Harvard Medical School

200 Longwood Avenue

Boston, Massachusetts, 02115 USA

<sup>3</sup>Department of Medical Oncology

Dana-Farber Cancer Institute

44 Binney Street, Dana 15

Boston, Massachusetts, 02115 USA

<sup>4</sup>Broad Institute of MIT and Harvard

415 Main Street

Cambridge, Massachusetts, 02139 USA

<sup>5</sup>Department of Pathology

Brigham and Women's Hospital

Harvard Medical School, Boston, MA

<sup>6</sup>Department of Oncologic Pathology

44 Binney Street, Dana 15

Boston, Massachusetts, 02115 USA

Pre-publication correspondence should be addressed to Peter K Sorger ([peter\\_sorger@hms.harvard.edu](mailto:peter_sorger@hms.harvard.edu))

copying Chris Bird ([Christopher\\_Bird@hms.harvard.edu](mailto:Christopher_Bird@hms.harvard.edu))

Key words: tissue imaging, histology, fluorescence microscopy, single-cell imaging, immuno-phenotyping, cancer

## ABSTRACT

**The architecture of normal and diseased tissues strongly influences the development and progression of disease as well as responsiveness and resistance to therapy. We describe a tissue-based cyclic immunofluorescence (t-CyCIF) method for highly multiplexed immuno-fluorescence imaging of formalin-fixed, paraffin-embedded (FFPE) specimens mounted on glass slides, the most widely used specimens for histopathological diagnosis of cancer and other diseases. t-CyCIF generates up to 60-plex images using an iterative process (a cycle) in which conventional low-plex fluorescence images are repeatedly collected from the same sample and then assembled into a high dimensional representation. t-CyCIF requires no specialized instruments or reagents and is compatible with super-resolution imaging; we demonstrate its application to quantifying signal transduction cascades, tumor antigens and immune markers in diverse tissues and tumors. The simplicity and adaptability of t-CyCIF makes it an effective method for pre-clinical and clinical research and a natural complement to single-cell genomics.**

## INTRODUCTION

Histopathology is among the most important and widely used methods for diagnosing human disease and studying the development of multi-cellular organisms. As commonly performed, imaging of formalin-fixed, paraffin-embedded (FFPE) tissue has relatively low dimensionality, primarily comprising Hematoxylin and Eosin (H&E) staining supplemented by immunohistochemistry (IHC). The potential of IHC to aid in diagnosis and prioritization of therapy is well established<sup>1</sup> but IHC is primarily a single channel method: imaging multiple antigens usually involves the analysis of sequential tissue slices or harsh stripping protocols (although limited multiplexing is possible using IHC and bright-field imaging<sup>2,3</sup>). Antibody detection via formation of a brown diaminobenzidine (DAB) or similar precipitate is also less quantitative than fluorescence<sup>4</sup>. The limitations of IHC are particularly acute when it is necessary to quantify complex cellular states and multiple cell types, such as tumor infiltrating regulatory and cytotoxic T cells,<sup>5</sup> in parallel with tissue and pharmacodynamic markers.

Advances in DNA and RNA profiling have dramatically improved our understanding of oncogenesis and propelled the development of targeted anti-cancer drugs.<sup>6</sup> Sequence data are particularly useful when an

oncogenic driver is both a drug target and a biomarker of drug response, such as *BRAF*<sup>V600E</sup> in melanoma<sup>7</sup> or *BCR-ABL*<sup>8</sup> in chronic myelogenous leukemia. However, in the case of drugs that act through cell non-autonomous mechanisms, such as immune checkpoint inhibitors, tumor-drug interaction must be studied in the context of multi-cellular environments that include both cancer and non-malignant stromal and infiltrating immune cells. Multiple studies have established that these components of the tumor microenvironment strongly influence the initiation, progression and metastasis of cancer<sup>9</sup> and the magnitude of responsiveness or resistance to therapy.<sup>10</sup>

Single-cell transcriptome profiling provides a means to dissect tumor ecosystems at a molecular level and quantify cell types and states.<sup>11</sup> However, single-cell sequencing usually requires disaggregation of tissues, resulting in loss of spatial context.<sup>11,12</sup> As a consequence, a variety of multiplexed approaches to analyzing tissues have recently been developed with the goal of simultaneously assaying cell identity, state, and morphology.<sup>13–17</sup> For example, FISSEQ<sup>18</sup> enables genome-scale RNA profiling of tissues at single-cell resolution, and multiplexed ion beam imaging (MIBI) and imaging mass cytometry achieve a high degree of multiplexing using antibodies as reagents, metals as labels and mass spectrometry as a detection modality.<sup>13,19</sup> Despite the potential of these new methods, they require specialized instrumentation and consumables, which is one reason that the great majority of basic and clinical studies still rely on H&E or single-channel IHC staining. Moreover, methods that involve laser ablation of samples such as MIBI inherently have a lower resolution than optical imaging.

Thus there remains a need for highly multiplexed tissue analysis methods that (i) minimize the requirement for specialized instruments and costly, proprietary reagents, (ii) work with conventionally prepared FFPE tissue specimens collected in clinical practice and research settings, (iii) enable imaging of ca. 50 antigens at subcellular resolution across a wide range of cell and tumor types, (iv) collect data with sufficient throughput that large specimens (several square centimeters) can be imaged and analyzed, (v) generate high resolution data typical of optical microscopy, and (vi) allow investigators to customize the antibody mix to specific questions or tissue types. Among these requirements the last is particularly critical: at the current early stage of development of high dimensional histology, it is essential that individual research groups be able to test the

widest possible range of antibodies and antigens in search of those with the greatest scientific and diagnostic value.

This paper describes a method for highly multiplexed fluorescence imaging of tissues, tissue-based cyclic immunofluorescence (t-CyCIF), inspired by a cyclic method first described by Gerdes et al.<sup>14</sup>. t-CyCIF also extends a method we previously described for imaging cells grown in culture.<sup>20</sup> In its current implementation, t-CyCIF assembles up to 60-plex images of FFPE tissue sections via successive rounds of 4-channel imaging. t-CyCIF uses widely available reagents, conventional slide scanners and microscopes, manual or automated slide processing and simple protocols. It can, therefore, be implemented in most research or clinical laboratories on existing equipment. Our data suggest that high dimensional imaging methods using cyclic immunofluorescence have the potential to become a robust and widely-used complement to single cell genomics, enabling routine analysis of tissue and cancer morphology and phenotypes at single-cell resolution.

## RESULTS

### **t-CyCIF enables multiplexed imaging of FFPE tissue and tumor specimens at sub-cellular resolution.**

Cyclic immunofluorescence<sup>14</sup> creates highly multiplexed images using an iterative process (a cycle) in which conventional low-plex fluorescence images are repeatedly collected from the same sample and then assembled into a high dimensional representation. In the implementation described here, samples ~5 µm thick are cut from FFPE blocks, the standard in most histopathology services, followed by dewaxing and antigen retrieval either manually or on automated slide strainers in the usual manner.<sup>21</sup> To reduce auto-fluorescence and non-specific antibody binding, a cycle of “pre-staining” is performed; this involves incubating the sample with secondary antibodies followed by fluorophore oxidation in a high pH hydrogen peroxide solution in the presence of light (“fluorophore bleaching”). Subsequent t-CyCIF cycles each involve four steps (Figure 1A): (i) immuno-staining with antibodies against protein antigens (three antigens per cycle in the implementation described here) (ii) staining with a DNA dye (commonly Hoechst 33342) to mark nuclei and facilitate image registration across cycles (iii) four-channel imaging at low and high magnifications (iv) fluorophore bleaching followed by a wash step and then another round of immuno-staining. In t-CyCIF, the signal-to-noise ratio often

increases with cycle number due to progressive reductions in background intensity over the course of multiple rounds of fluorophore bleaching. This effect is visible in Figure 1B as the gradual disappearance of an auto-fluorescent feature (denoted by a dotted white oval and quantified in Figure 1-figure supplement 1; see detailed analysis below). When no more t-CyCIF cycles are to be performed, the specimen is stained with H&E to enable conventional histopathology review. Individual image panels are stitched together and registered across cycles followed by image processing and segmentation to identify cells and other structures.

t-CyCIF allows for one cycle of indirect immunofluorescence using secondary antibodies. In all other cycles antibodies are directly conjugated to fluorophores, typically Alexa 488, 555 or 647 (for a description of different modes of CyCIF see Ref 20). As an alternative to chemical coupling we have tested the Zenon™ antibody labelling method<sup>22</sup> from ThermoFisher in which isotype-specific Fab fragments pre-labelled with fluorophores are bound to primary antibodies to create immune complexes; the immune complexes are then incubated with tissue samples (Figure 1-figure supplement 2). This method is effective with 30-40% of the primary antibodies that we have tested and potentially represents a simple way to label a wide range of primary antibodies with different fluorophores.

Imaging of t-CyCIF samples can be performed on a variety of fluorescent microscopes each of which represent a different tradeoff between data acquisition time, image resolution and sensitivity (Table 1). Greater resolution (a higher numerical aperture objective lens) typically corresponds to a smaller field of view and thus, longer acquisition time for large specimens. Imaging of specimens several square centimeters in area at a resolution of ~1  $\mu\text{m}$  is routinely performed on microscopes specialized for scanning slides (slide scanners); we use a CyteFinder system from RareCyte (Seattle WA) configured with 10X 0.3 NA and 40X 0.6 NA objectives but have tested scanners from Leica, Nikon and other manufacturers. Figures 2A-B show an H&E image of a ~10 x 11mm metastatic melanoma specimen and a t-CyCIF image assembled from 165 individual image tiles stitched together.

Stitching is performed using *Ashlar*, a newly developed software package; the BaSiC algorithm is used to correct for uneven illumination (Figure 2-figure supplement 1)<sup>23</sup>. In Figure 2B tumor cells staining positive for S100 (a melanoma marker in green<sup>24</sup>) are surrounded by CD45-positive immune cells (CD45RO<sup>+</sup> cells in

white) and by stromal cells expressing the alpha isoform of smooth muscle actin ( $\alpha$ -SMA in red). By zooming in on one tile, single cells can be identified and characterized (Figure 2C); in this image, CD4<sup>+</sup> and CD8<sup>+</sup> T-lymphocytes and proliferating pRB<sup>+</sup> positive cells are visible. At 60X resolution on a confocal GE INCell Analyzer 6000, kinetochores stain positive for the phosphorylated form of the Aurora A/B/C kinase and can be counted in a mitotic cell (yellow arrowhead in Figure 2D). Nominally super-resolution imaging on a GE OMX Blaze Structured Illumination Microscope<sup>25</sup> (using a 60X 1.42 Plan Apo objective) reveals very fine structural details including differential expression of Lamin isotypes (in a melanoma, Figure 2E and Figure2-figure supplement 2) and mitotic spindle fibers (in cells of a xenograft tumor; Figure 2F and Figure2-figure supplement 2). These data show that t-CyCIF images have readily interpretable features at the scale of an entire tumor, individual tumor cells and sub-cellular structures. Little subcellular (or super-resolution) imaging of clinical FFPE specimens has been reported to date (but see Ref. 26), but fine subcellular morphology has the potential to provide dramatically greater information than simple integration of antibodies intensities across whole cells.

To date, we have tested commercial antibodies against ~200 different proteins for their compatibility with t-CyCIF; these include lineage makers, cytoskeletal proteins, cell cycle regulators, the phosphorylated forms of signaling proteins and kinases, transcription factors, markers of cell state including quiescence, senescence, apoptosis, stress, etc. as well as a variety of non-antibody based fluorescent stains (Table 2). Multiplexing antibodies and stains makes it possible to discriminate among proliferating, quiescent and dying cells, identify tumor and stroma, and collect immuno-phenotypes.<sup>19,27,28</sup> Use of phospho-specific antibodies and antibodies against proteins that re-localize upon activation (e.g. transcription factors) make it possible to assay the states of signal transduction networks. For example, in a 10-cycle t-CyCIF analysis of human tonsil (Figure 3A) subcellular features such as membrane staining, Ki-67 puncta (Cycle 1), ring-like staining of the nuclear lamina (Cycle 6) and nuclear exclusion of NF- $\kappa$ B (Cycle 6) can easily be demonstrated (Figure 3B). The five-cycle t-CyCIF data on normal skin in Figure 3C shows tight localization of auto-fluorescence (likely melanin) to the epidermis prior to pre-bleaching and images of three non-antibody stains used in the last t-CyCIF cycle:

HCS CellMask Red Stain for cytoplasm and nuclei, Actin Red, a Phalloidin-based stain for actin and Mito-tracker Green for mitochondria.

In the current work, we rely exclusively on commercial antibodies that have previously been validated using IHC or conventional immunofluorescence; when feasible we confirm that staining by t-CyCIF resembles what has previously been reported for IHC staining. This does not constitute a sufficient level of testing or validation for discovery science or clinical studies and the patterns of staining described in this paper should therefore be considered illustrative of the t-CyCIF approach rather than definitive descriptions; we are currently developing a database of matched t-CyCIF and IHC images across multiple tissues and knockdown cell lines to address this issue and share validation test data with the wider research community.

### **Fluorophore inactivation, cycle count and tissue integrity**

The efficiency of fluorophore inactivation by hydrogen peroxide, light and high pH varies with fluorophore but only minimally with the antibody to which the fluorophore is coupled (Alexa Fluor 488 is inactivated more slowly than Alexa Fluor 570 or 647; Figures 4B and Figure 4-figure supplement 1). We typically incubate specimens in bleaching conditions for 60 minutes, which is sufficient to reduce fluorescence intensity by  $10^2$  to  $10^3$ -fold (Figure 4C). When testing new antibodies or analyzing new tissues, imaging is performed after each bleaching step and prior to initiation of another t-CyCIF cycle to ensure that fluorophore inactivation is complete. In preliminary studies, we have tested a range of other fluorophores for their compatibility with t-CyCIF including FITC, TRITC, phycoerythrin, Allophycocyanin, eFluor 570 and eFluor 660 (eBioscience). We conclude that it will be feasible to increase the number of t-CyCIF channels per cycle from four to at least six (3 to 5 antibodies plus a DNA stain). However, all of the images in this paper are collected using a four-channel method.

The primary limitation on the number of t-CyCIF cycles that can be performed is the integrity of the tissue: some tissues samples are physically more robust and can withstand more staining and washing procedures than others (Figure 4D). To study the effect of cycle number on tissue integrity, we performed a 10-cycle t-CyCIF experiment on a tissue microarray (TMA) comprising a total of 40 cores from 16 different tissues and tumor types. After each t-CyCIF cycle, the number of nuclei remaining was quantified for each core

relative to the initial number. For example, Figure 4D shows breast, bladder, lung and prostate cores in which cell number fell between ~2% and an unusually high 46% (apparent increases in cell number in these data are caused by fluctuation in the performance of cell segmentation routines and are not statistically significant). Cells that were lost appear red in these images. The data show that loss is often uneven across samples, preferentially affecting regions of tissue with low cellularity.

Overall, we found that the extent of cell loss varied with tissue type and, within a single tissue type, from core to core (6 breast cores are shown; Figure 4E). For many tissues we have not yet attempted to optimize cycle number and the experiments performed to date do not fully control for pre-analytical variables<sup>29</sup> such as fixation time and the age of tissue blocks. As a rule, we find that normal tonsil, skin, glioblastoma, ovarian cancer, pancreatic cancer and melanoma can be subjected to >15 cycles with less than 25% cell loss. Figure 4F shows a melanoma specimen subjected to 20 t-CyCIF cycles with good preservation of cell and tissue morphology (Figure 4G). We conclude that t-CyCIF is compatible with multiple normal tissues and tumor types but that some tissues and/or specimens can be subjected to more cycles than others. One requirement for high cycle number appears to be cellularity: samples in which cells are very sparse tend to be more fragile. We expect improvements in cycle number with additional experimentation and the use of fluidic devices that deliver staining and wash liquids more gently.

One concern about cyclic immunofluorescence is that the process is relatively slow; each cycle takes 6-8 hours and we typically perform one cycle per day. However, a single operator can easily process 30 slides in parallel, and in the case of TMAs, 30 slides can over 2000 more different samples. Under these conditions, the most time-consuming step in t-CyCIF is collecting 200-400 images for each slides. Time could be saved by imaging fewer cells per sample, but the results described below (demonstrating substantial cellular heterogeneity in a single piece of a tumor resection) strongly argue in favor of analysis of as large a fraction of each tissue specimen as possible. As a practical matter, data analysis and data interpretation remain more time-consuming than data collection. We also note that the throughput of t-CyCIF compares favorably with other tissue-imaging platforms with single-cell transcriptome profiling.

## **Impact of cycle number on immunogenicity**

Because t-CyCIF assembles multiplex images sequentially, it is sensitive to factors that alter immunogenicity as cycle number increases. To investigate such effects, we performed a 16-cycle t-CyCIF experiment in which the order of antibody addition was varied between two immediately adjacent tissue slices cut from the same tissue block (Figure 5A; Slides A and B); the study was repeated three times, once with tonsil and twice with melanoma specimens with similar results ( $\sim 1.8 \times 10^5$  cells were used for the analysis and overall cell loss was  $<15\%$ ).

This experimental design made it possible to judge: (i) the repeatability of staining a single specimen using the same set of antibodies (Figure 5A, denoted by yellow highlight) (ii) the similarity of staining between slides A and B (blue highlight) and (iii) the effect of swapping the order of antibody addition (cycle number) between slides A and B (blue lines). Comparisons within a single slide were made on a cell-by-cell basis but because slides A and B contain different cells, comparisons between slides were made at the level of intensity distributions (computed on a per-cell basis following segmentation). The repeatability of staining (as measured in cycles 3,7,12 and 16) was performed using anti-PCNA-Alexa 488, anti-Vimentin-Alexa 555 and anti-Tubulin- Alexa 647 which bind abundant proteins with distinctive intracellular distributions (Figure 5B). Repeated staining of the same antigen is expected to saturate epitopes, but we reasoned that this effect would be less pronounced the more abundant the antigen. For PCNA, the correlation in staining intensities across 4 cycles was high ( $\rho = 0.95$  to  $0.99$ ) and somewhat lower in the case of Vimentin and Tubulin ( $\rho = 0.80$  to  $0.95$ ; Figure 6A; a more extensive comparison is shown in Figure 6-figure supplement 1). When we examined the corresponding images, it was readily apparent that Tubulin, and to a lesser extent Vimentin, stained more intensely in later than in earlier t-CyCIF cycles (see intensity distributions in Figure 6A and images in Figure 6B). When images were scaled to equalize the intensity range (by histogram equalization), staining patterns were indistinguishable across all cycles and loss of cells or specific subcellular structures was not obviously a factor (Figure 6B, left vs right panels and Figure 6C). Thus, for at least a subset of antibodies, staining intensity increases rather than decreases with cycle number whereas background fluorescence falls. As a consequence, dynamic range, defined here as the ratio of the least to the most intense 5% of pixels, frequently increases with

cycle number (Figure 6A and Figure 6-figure supplement 1). These effects were reproducible across slides A and B in all three experiments performed.

When we compared staining between slides A and B for the same antibodies and cycle number, the overlap in intensity distributions was high ( $>0.85$ ), demonstrating good sample to sample reproducibility. The overlap remained high for the majority of antibodies even when they were used in different cycles on slides A and B, but for some antibodies, signal intensity clearly increased or decreased with cycle number (Figure 6D; blue and red outlines). In the case of 8 antibodies (including tubulin, as discussed above) the overlap in intensity distributions was  $<0.6$  as a consequence of both increases and decreases in staining intensity with cycle number (Figure 6E). Overall, we found that the repeatability of staining between two biological samples was highest when the antibodies were used in the same cycle on both samples, lower when the antibodies were used in different cycles on the sample, and lowest when both the order and sample were different (Figure 6F).

The reasons for these differences are not known, but the fact that the same changes in staining intensity were observed across multiple experiments (for any single antibody) suggests that they arise not from irreproducibility of the t-CyCIF procedure but rather from changes in epitope accessibility. Even in these cases, it appears that it is absolute intensity rather than morphology that is variable. Thus, while changes in staining intensity with cycle number are a concern for a subset of t-CyCIF antibodies, it should be possible to minimize the problem by staining all samples in the same order. Other approaches will also be important; for example, using calibration standards and identifying antibodies with the least variation in cycle number.

One way to reduce artefacts generated by differences in the order of antibody addition is to create a single high-plex antibody mixture and then stain all antigens in parallel. This approach is not compatible with t-CyCIF but is feasible using methods such as MIBI or CODEX<sup>19,28</sup>. However, there is substantial literature showing that the formulation of highly multiplex immuno-assays is complicated by interaction among antibodies<sup>30</sup> that has a physicochemical explanation in some cases in weak self-association and viscosity.<sup>31</sup> Consistent with these data, we have observed that when 8 or more unlabeled antibodies are added to a t-CyCIF experiment, the intensity of staining can fall, although the effect is smaller than observed with the antibodies most sensitive to order of addition. We conclude that the construction of sequentially-applied t-CyCIF antibody

panels and of single high-plex mixtures will both require optimization of specific panels and their method of use.

## Analysis of large specimens by t-CyCIF

Review of large histopathology specimens by pathologists involves rapid and seamless switching between low power fields to scan across large regions of tissue and high-power fields to study cellular morphology. To mimic this integration of information at both tissue and cellular scales we performed 8-cycle t-CyCIF on a large 2 x 1.5 cm resection specimen that includes pancreatic ductal adenocarcinoma (PDAC) and adjacent normal pancreatic tissue and small intestine (Figure 7A-C). Nuclei were located in the DAPI channel and cell segmentation performed using a watershed algorithm (Figure 7-figure supplement 1: see Methods section for a discussion of the method and its caveats) yielding  $\sim 2 \times 10^5$  single cells each associated with a vector comprising 25 whole-cell fluorescence intensities. Differences in subcellular distribution were evident for many proteins, but for simplicity, we only analyzed fluorescence intensity on a per-antigen basis integrated over each whole cell. Results were visualized by plotting intensity value onto the segmentation data (Figure 7D), by computing correlations on a cell-by-cell basis (Figure 7E), or by using t-distributed stochastic neighbor embedding (t-SNE)<sup>32</sup>, which clusters cells in 2D based on their proximity in the 25-dimensional space of image intensity data (Figure 8A).

The analysis in Figure 7E shows that E-cadherin, keratin and  $\beta$ -catenin levels are highly correlated with each other whereas vimentin and VEGFR2 receptor levels are anti-correlated, recapitulating the known dichotomy between epithelial and mesenchymal cell states in normal and diseased tissues. Many other physiologically relevant correlations are also observed, for example between the levels of pERK<sup>T202/Y204</sup> (the phosphorylated, active form of the kinase) and activating phosphorylation of the downstream kinase pS6<sup>S235/S236</sup> ( $r = 0.81$ ). When t-SNE was applied to all cells in the specimen, we found that those identified during histopathology review as being from non-neoplastic pancreas (red) were distinct from PDAC (green) and also from the neighboring non-neoplastic small intestine (blue) (Figure 8 B-D). Vimentin and E-Cadherin had very different levels of expression in PDAC and normal pancreas as a consequence of epithelial-to-mesenchymal transitions (EMT) in malignant tissues as well as the presence of a dense tumor stroma, a desmoplastic reaction

that is a hallmark of the PDAC microenvironment.<sup>33</sup> The microenvironment of PDAC was more heavily infiltrated with CD45<sup>+</sup> immune cells than the normal pancreas, and the intestinal mucosa of the small intestine was also replete with immune cells, consistent with the known architecture and organization of this tissue.

The capacity to image samples that are several square centimeters in area with t-CyCIF can facilitate the detection of signaling biomarker heterogeneity. The WNT pathway is frequently activated in PDAC and is important for oncogenic transformation of gastrointestinal tumours<sup>34</sup>. Approximately 90% of sporadic PDACs also harbor driver mutations in KRAS, activating the MAPK pathway and promoting tumorigenesis<sup>35</sup>. Studies comparing these pathways have come to different conclusions with respect to their relationship: some studies show concordant activation of MAPK and WNT signaling and others argue for exclusive activation of one pathway or the other<sup>36</sup>. In t-SNE plots derived from images of PDAC, multiple sub-populations of cells representing negative, positive or no correlation between pERK and  $\beta$ -catenin levels can be seen (marked with labels “a”, “b” or “c”, respectively in Figure 8A). The same three relationships can be found in non-neoplastic pancreas and small intestine (Figure 8A and 7C). In PDAC, malignant cells can be distinguished from stromal cells, to a first approximation, by high proliferative index, which can be measured by staining for Ki-67 and PCNA<sup>37</sup>. When we gated for cells that were both Ki67<sup>high</sup> and PCNA<sup>high</sup>, and thus likely to be malignant, the co-occurrence of different relationship between pERK and  $\beta$ -catenin levels on a cellular level was again evident. While we cannot exclude the possibility of phospho-epitope loss during sample preparation, it appears that the full range of possible relationships between the MAPK and WNT signaling pathways described in the literature can be found within a specimen from a single patient, illustrating the impact of tissue context on the activities of key signal transduction pathways.

### **Multiplex imaging of immune infiltration**

Immuno-oncology drugs, including immune checkpoint inhibitors targeting CTLA-4 and the PD-1/PD-L1 axis are rapidly changing the therapeutic possibilities for traditionally difficult-to-treat cancers including melanoma, renal and lung cancers, but responses are variable across and within cancer types. The hope is that tumor immuno-profiling will yield biomarkers predictive of therapeutic response in individual patients. For

example, expression of PD-L1 correlates with responsiveness to the ICIs pembrolizumab and nivolumab<sup>38</sup> but the negative predictive value of PD-L1 expression alone is insufficient to stratify patient populations<sup>39</sup>. In contrast, by measuring PD-1, PD-L1, CD4 and CD8 by IHC on sequential tumor slices, it has been possible to identify some immune checkpoint-responsive metastatic melanomas<sup>10</sup>. To test t-CyCIF in this application, 8-cycle imaging was performed on a 1 x 2 cm specimen of clear-cell renal cell carcinoma using 10 antibodies against multiple immune markers and 12 against other proteins expressed in tumor and stromal cells (Figures 9A-B; supplement file 4). A region of the specimen corresponding to tumor was readily distinguishable from non-malignant stroma based on  $\alpha$ -SMA expression ( $\alpha$ -SMA<sup>high</sup> regions denote stroma and  $\alpha$ -SMA<sup>low</sup> regions high density of malignant cells).

In the  $\alpha$ -SMA<sup>low</sup> domain, CD3<sup>+</sup> or CD8<sup>+</sup> lymphocytes were 4-fold enriched (Figures 9C) and PD-1 and PD-L1 positive cells were 13 to 20-fold more prevalent as compared to the surrounding tumor stroma ( $\alpha$ -SMA<sup>high</sup> domain); CD3<sup>+</sup> CD8<sup>+</sup> double positive T-cells were found almost exclusively in the tumor. Suppression of immune cells is mediated by binding of PD-L1 ligand, which is commonly expressed by tumor cells, to the PD1 receptor expressed on immune cells<sup>10</sup>. To begin to estimate the likelihood of ligand-receptor interactions, we quantified the degree of co-localization of cells expressing the two molecules. The centroids of PD-1<sup>+</sup> or PD-L1<sup>+</sup> cells were determined from images (PD-1, red; PD-L1, green, Figure 9E) and co-localization (highlighted in yellow, Figure 9F) computed by k-nearest neighbor analysis. We found that co-localization of PD-1/PD-L1 was ~2.7 fold more likely (Figure 9-figure supplement 1) in tumor and stroma and was concentrated on the tumor-stroma border consistent with previous reports on melanoma<sup>10</sup>. These data demonstrate the potential of spatially-resolved immuno-phenotyping to quantify state and location of tumor infiltrating lymphocytes; such data may ultimately yield biomarkers predictive of sensitivity to immune checkpoint inhibitor<sup>10</sup>.

### **Analysis of diverse tumor types and grades using t-CyCIF of tissue-microarrays (TMA)**

To explore the general utility of t-CyCIF in a range of healthy and cancer tissues we applied 8 cycle t-CyCIF to TMAs containing 39 different biopsies from 13 healthy tissues and 26 biopsies corresponding to low and high-grade cancers from the same tissue types (Figure 10A and Figure 10-figure supplement 1, Supplement

file 3 for antibodies used, Supplement file 5 for TMA details and naming conventions) and then performed t-SNE on single cell intensity data (Figure 10B). The great majority of TMA samples mapped to one or a few discrete locations in the t-SNE projection (compare normal kidney tissue - KI1, low grade tumors - KI2, and high-grade tumors – KI3; Figure 10C) although ovarian cancers were scattered across the t-SNE projection (Figure 10D); overall, there was no separation between normal tissue and tumors regardless of grade (Figure 10E). In a number of cases, high grade cancers from multiple different tissues of origin co-clustered, implying that transformed morphologies and cell states were closely related. For example, while healthy and low grade pancreatic and stomach cancer occupied distinct t-SNE domains, high grade pancreatic and stomach cancers were intermingled and could not be readily distinguished (Figure 10F), recapitulating the known difficulty in distinguishing high grade gastrointestinal tumors of diverse origin by histopathology.<sup>40</sup> Nonetheless, t-CyCIF might represent a means to identify discriminating biomarkers by efficiently sorting through large numbers of alternative antigens and antigen localizations.

### **Quantitative analysis reveals global and regional heterogeneity and multiple histologic subtypes within the same tumor in glioblastoma multiforme (GBM).**

Data from single-cell genomics reveals extensive heterogeneity in many types of cancer<sup>41</sup> but our understanding of this phenomenon requires spatially-resolved data.<sup>13</sup> We performed 8-cycle imaging on a 2.5 cm x 1.8 mm resected glioblastoma (GBM) specimen imaging markers of neural development, cell cycle state and signal transduction (Figure 11A-B, Supplement file 6). GBM is a highly aggressive and genetically heterogeneous<sup>42</sup> brain cancer commonly classified into four histologic subtypes.<sup>43</sup> Following image segmentation, phenotypic heterogeneity was assessed at three spatial scales corresponding to: (i) 1.6 x 1.4 mm fields of view (252 total) each of which comprised  $10^3$  to  $10^4$  cells (ii) seven macroscopic regions of  $\sim 10^4$  to  $10^5$  cells each, corresponding roughly to tumor lobes and (iii) the whole tumor comprising  $\sim 10^6$  cells. To quantify local heterogeneity, we computed the informational entropy on a-per-channel basis for  $10^3$  randomly selected cells in each field (Figure 11C, see online Methods for details). In this setting, informational entropy is a measure of cell-to-cell heterogeneity on a mesoscale corresponding to 10-30 cell diameters. For a marker such

as EGFR, which can function as a driving oncogene in GBM, informational entropy was high in some areas (Figure 11C; red dots) and low in others (blue dots). Areas with high entropy in EGFR abundance did not correlate with areas that were most variable with respect to a downstream signaling protein such as pERK. Thus, the extent of local heterogeneity varied with the region of the tumor and the marker being assayed.

Semi-supervised clustering using expectation–maximization Gaussian mixture (EMGM) modeling of all cells in the tumor yielded eight distinct clusters, four of which encompassed 85% of all cells (Figure 12A and Figure 12-figure supplement 1). Among these, cluster one had high EGFR levels, cluster two had high NGFR and Ki67 levels and cluster six had high levels of vimentin; cluster five was characterized by high keratin and pERK levels. The presence of four highly populated t-CyCIF clusters is consistent with data from single-cell RNA-sequencing of ~400 cells from five GBMs<sup>12</sup>. Three of the t-CyCIF clusters have properties reminiscent of established histological subtypes including: classical, cluster 1; pro-neural, cluster 3; and mesenchymal, cluster 6, but additional work will be required to confirm such assignments.

To study the relationship between phenotypic diversity and tumor architecture, we mapped each cell to an EMGM cluster (denoted by color). Extensive intermixing was observed at all spatial scales (Figure 12B). For example, field of view 147 was highly enriched for cells corresponding to cluster 5 (yellow), but a higher-magnification view revealed extensive intermixing of four other cluster types on a scale of ~3-5 cell diameters (Figure 12C). At the level of larger, macroscopic tumor regions, the fraction of cells from each cluster also varied dramatically (Figure 12D). None of these findings was substantially different when the number of clusters was set to 12 (Figure 12-figure supplement 2).

These results have several implications. First, they suggest that GBM is phenotypically heterogeneous on a spatial scale of 5-1000 cell diameters and that cells corresponding to distinct t-CyCIF clusters are often found in the vicinity of each other. Second, sampling a small region of a large tumor has the potential to misrepresent the proportion and distribution of tumor subtypes, with implications for prognosis and therapy. Similar concepts likely apply to other tumor types with high genetic heterogeneity, such as metastatic melanoma<sup>11</sup>, and are therefore relevant to diagnostic and therapeutic challenges arising from tumor heterogeneity.

## DISCUSSION

The complex molecular biology and spatial organization of tissues and solid tumors poses a scientific and diagnostic challenge that is not sufficiently addressed using single-cell genomics, in which morphology is commonly lost, or H&E and single-channel IHC staining, which provide data on only a few proteins or molecular features. At the same time, the vast number of FFPE histological specimens collected in the course of routine clinical care and clinical trials (and in the study of model organisms) represents an underutilized resource with great potential for novel discovery. A variety of methods for performing highly multiplexed immune-based imaging of cells and tissues has recently been described including imaging cytometry<sup>27</sup>, MIBI<sup>19</sup>, DNA-exchange imaging (DEI)<sup>44</sup> and CODEX<sup>28</sup>; FISSEQ<sup>18</sup> directly images expressed RNAs. Like traditional antibody stripping approaches, the cyclic immunofluorescence approach first described by Gerdes et al<sup>14</sup> and further developed here assembles highly multiplexed images by sequential acquisition of lower dimensional immunofluorescence images. We show here that the t-CyCIF implementation of cyclic immunofluorescence is compatible with a wide range of antibodies and tissue types and yields up to 60-plex images with excellent preservation of small intracellular structures.

The requirement in t-CyCIF for multiple rounds of staining and imaging might seem to be a liability but it has several substantial advantages relative to all-in-one methods such as MIBI, DEI and CODEX. First, t-CyCIF can be performed using existing fluorescence microscopes. Not only does this reduce costs and barriers to entry, it allows the unique strengths of slide-scanning, confocal, and structured illumination microscopes to be exploited. Using different instruments, samples several square centimeters in area can be rapidly analyzed at resolutions of  $\sim 1\mu\text{m}$  and selected fields of view studied at super-resolution ( $\sim 110\text{ nm}$  on an OMX Blaze). Multiscale imaging makes it possible to combine tissue-level architecture with subcellular morphology, much like a pathologist switching between low to high power fields, but there is little chance that such capabilities can be combined in a single instrument. Because no spectral deconvolution is required, t-CyCIF can use highly optimized filter sets and fluorophores, resulting in good sensitivity. t-CyCIF antibody panels are also simple to assemble and validate using commercial antibodies, including those that constitute FDA-approved diagnostics.

This avoids the limitations of pre-assembled reagent kits provided by manufacturers. Finally, t-CyCIF is compatible with H&E staining, enabling fluorescence imaging to be combined with conventional histopathology review.

Commercial systems for non-optical tissue imaging are only now starting to appear and it is difficult to compare their performance to multiplexed immunofluorescence, particularly because the approach published by Gerdes<sup>14</sup> is proprietary and available only as commercial service. In contrast, the t-CyCIF implementation described here can easily be implemented in a conventional research or clinical laboratory without the need for expensive equipment or specialized reagents. As MIBI, DEI and CODEX instruments come on-line, direct comparison with t-CyCIF will be possible. We anticipate that high resolution and good linearity will be areas in which fluorescence imaging is superior to enzymatic amplification, laser ablation or mechanical picking of tissues. t-CyCIF is relatively slow when performed on a single sample, but when many large specimens or TMAs are processed in parallel, throughput is limited primarily by imaging acquisition, which is at least as fast as approaches involving laser ablation. Considerable opportunity exists for further improvement in t-CyCIF by switching from four to six-channels per cycle, optimizing bleach and processing solutions to preserve tissue integrity, using fluidic devices to rapidly process many slides in parallel and developing better software for identifying fields of view that can be skipped in large irregular specimens. Because direct fluorescence will remain challenging in the case of very rare epitopes, we speculate that hybrid approaches involving t-CyCIF and methods such as DEI will ultimately prove to be most effective.

As in all methods involving immune detection, antibodies are the most critical and difficult to validate reagents in t-CyCIF. To date, we have shown that over 200 commercial antibodies are compatible with the method as judged by patterns of staining similar to those previously reported for IHC; this is an insufficient level of validation for most studies and we are therefore working to develop a generally useful antibody validation resource ([www.cycif.org](http://www.cycif.org)). Thus, while this paper describes markers relevant to diagnosis of disease, our results are illustrative of the t-CyCIF approach and specific findings might not prove statistically significant when tested on larger, well-controlled sets of human samples.

There is little or no evidence that antigenicity falls across the board in t-CyCIF as cycle number increases; signal-to-noise ratios can even increase due to falling background auto-fluorescence. When samples are stained with the same antibodies in different t-CyCIF cycles, repeatability is high (as measured by correlation in staining intensity on a cell-by-cell basis) as is reproducibility across two successive slices of tissue (as measured by overlap in intensity distributions). Moreover, for the majority of antibodies tested, order of use is not critical. For some antibodies fluorescence intensity increases with cycle number and for others it decreases; these factors need to be considered when developing a staining strategy. While the precise reasons for variation in staining with cycle number are not clear, they can be overcome by staining all specimens with the same antibodies in the same order (which also represents the most practical approach). However, this solution is likely to be insufficient for creation of large-scale t-CyCIF datasets in which diverse tissues will be compared with each other (e.g. in proposed tissue atlases<sup>45</sup>) and it will therefore be important to identify antibodies for which cycle number has minimal impact and to create effective methods to correct for those fluctuations that do occur (e.g. inclusion of staining controls).

As an initial application of t-CyCIF, we examined a cancer resection specimen that includes PDAC, healthy pancreas and small intestine. Images were segmented and fluorescence intensities in  $\sim 10^5$  whole cells calculated for 24 antibody channels plus a DNA stain. Integrating intensities in this manner does not make use of the many subcellular features visible in t-CyCIF images and therefore represents only a first step in data analysis. We find that expression of vimentin and E-cadherin, classical markers of epithelial and mesenchymal cells, are strongly anti-correlated at a single-cell level and that malignant tissue is skewed toward EMT, consistent with prior knowledge on the biology of pancreatic cancer<sup>46</sup>. The WNT and ERK/MAPK pathways are known to play important roles in the development of PDAC<sup>34</sup>, but the relationship between the two pathways remains controversial. t-CyCIF reveals a negative correlation between  $\beta$ -catenin levels (a measure of WNT pathway activity) and pERK (a measure of MAPK activity) in cells found in some regions of PDAC, non-malignant small intestine and pancreas, a positive correlation in other regions and no significant correlation in yet others. Thus, the full range of discordant observations found in the literature can be recapitulated within a single tumor, emphasizing the wide diversity of signaling states observable at a single cell level.

As a second application of t-CyCIF, we studied within-tumor heterogeneity in GBM, a brain cancer with multiple histological subtypes whose differing properties impact prognosis and therapy.<sup>43,47</sup> Clustering reveals multiple phenotypic classes intermingled at multiple spatial scales with no evidence of recurrent patterns. In the GBM we have studied in detail, heterogeneity on a scale of 10-100 cell diameters is as great as it is between distinct lobes. The proportion of cells from different clusters also varies dramatically from one tumor lobe to the next. Although it is not yet possible to link t-CyCIF clusters and known histological subtypes, cell-to-cell heterogeneity on these spatial scales are likely to impact the interpretation of small biopsies (e.g. a core needle biopsy) of a large tumor sample; the data also emphasize the inherent limitation in examining only a small part of a large tumor specimen (e.g. to save time on image acquisition). At the same time it is important to note that cell-to-cell heterogeneity is caused by processes operating on a variety of time scales, only some of which are likely to be relevant to therapeutic response and disease progression. For example, some cell-to-cell differences visible in GBM images arise from a cyclic process, such as cell cycle progression, whereas others appear to involve differences in cell lineage or clonality. Methods to correct for the effects of variation in cell cycle state have been worked out for single-cell RNA-sequencing<sup>48</sup>, but will require further work in imaging space.

In a third application of t-CyCIF we characterized tumor-immune cell interactions in a renal cell tumor. Immune checkpoint inhibitors elicit durable responses in a portion of patients with diverse types of cancer, but identifying potential responders and non-responders remains a challenge. In those cancers in which it has been studied<sup>38</sup>, quantification of single checkpoint receptors or ligands by IHC lacks sufficient positive and negative predictive value to stratify therapy or justify withholding checkpoint inhibitors in favor of small molecule therapy<sup>39</sup>. Multivariate predictors based on multiple markers such as CD3, CD4, CD8, PD-1 etc. appear to be more effective, but still underperform in patient stratification<sup>10</sup> probably because cells other than CD8+ lymphocytes affect therapeutic responsiveness. In this paper, we perform a simple analysis to show that tumor infiltrating lymphocytes can be subtyped by t-CyCIF and analyzed for the proximity of PD-1 and PD-L1 at a single cell level. Next steps involve thorough interrogation of immuno-phenotypes by multiplex imaging to relate staining patterns in images to immune cell classes previously defined by flow cytometry and to identify immune cell states that fall below the limit of detection for existing analytical methods.

In conclusion, t-CyCIF is a robust, easy to implement approach to multi-parametric tissue imaging applicable to many types of tumors and tissues; it allows investigators to mix and match antibodies depending on the requirements of a specific type of sample. To create a widely available community resource, we have posted antibody lists, protocols and example data at <http://www.cycif.org> and intend to update this information on a regular basis. Highly multiplexed histology is still in an early stage of development and better methods for segmenting cells, quantifying fluorescence intensities and analyzing the resulting data are still required. For example, quantification of cell-to-cell heterogeneity may enable reconstruction of signaling network topologies in situ<sup>13,49</sup> by exploiting the fact that protein abundance and states of activity fluctuate from one cell to the next; when fluctuations are well correlated, they are likely to reflect causal associations<sup>50</sup>. We expect t-CyCIF to be complementary to, and used in parallel with other protein and RNA imaging methods such as FISSEQ<sup>51</sup> or DEI<sup>52</sup> that may have higher sensitivity or greater channel capacity. A particularly important task will be cross-referencing tumor cell types identified by single-cell genomics or multi-color flow cytometry with those identified by multiplexed imaging, making it possible to precisely define the genetic geography of human cancer and infiltrating immune cells.

**Acknowledgements.** This work was funded by NIG grants P50-GM107618 (PKS), U54-HL127365 (PKS), and R41-CA224503 (PKS) and by a DF/HCC GI SPORE Developmental Research Project Award (BI) and DFCI Claudia Adams Barr Program for Innovative Cancer Research Award (BI). BI was also supported by grant K08CA222663. We thank J. Waters and T. Lambert from the Harvard Cell Biology Microscopy Facility for access to the OMX Blaze, their guidance on SIM acquisition and analysis, and L. Shao for CUDA-accelerated SIM reconstruction code., B. Wolpin and C. Lian for providing specimens, Z. Maliga and J. Muhlich for technical support and L. Garraway, and members of Ludwig Center for Cancer Research at Harvard for many fruitful discussions.

**Competing financial interests**

PKS is a member of the Scientific Advisory Board of RareCyte Inc., which manufactures the CyteFinder slide scanner used in this study; research with RareCyte is funded by NIH grant R41 CA224503 (PI E. Kaldjian). PKS is also co-founder of Glencoe Software, which contributes to and supports the open-source OME/OMERO image informatics software used in this paper. Other authors have no competing financial interests to disclose.

## MATERIALS AND METHODS

We continue to improve the methods described here; periodic updates can be found at our web site [www.cycif.org](http://www.cycif.org).(RRID:SCR\_016267) A video illustrating the t-CyCIF approach can be found at <https://youtu.be/fInnargF2fs>.

Key recourses and reagents used in this study are listed in Table 3.

### Patients and specimens

Formalin fixed and paraffin embedded (FFPE) tissues from were retrieved from the archives of the Brigham and Women's Hospital as part of discarded/excess tissue protocols or obtained from commercial vendors. The Institutional Review Board (IRB) of the Harvard Faculty of Medicine last reviewed the research described in this paper on 2/16/2018 (under IRB17-1688) and judged it to "involve no more than minimal risk to the subjects" and thus eligible for a waiver of the requirement to obtain consent as set out in 45CFR46.116(d). Tumor tissue and FFPE specimens were collected from patients under IRB-approved protocols (DFCI 11-104) at Dana-Farber Cancer Institute/Brigham and Women's Hospital, Boston, Massachusetts. Tonsil samples used in Figure 1 were purchased from American MasterTech (CST0224P). Tissue microarrays for analyses in Figure 4D and E were obtained from Biomax (Cat. MTU481); detailed information can be found online at [https://www.biomax.us/tissue-arrays/Multiple\\_Organ/MTU481](https://www.biomax.us/tissue-arrays/Multiple_Organ/MTU481). Tissue microarrays (TMA) for diverse healthy tissues and tumor analyses were obtained from Protein Biotechnologies (Cat. TMA-1207).

### Reagents and antibodies

All conjugated and unconjugated primary antibodies used in this study are listed in Table 2. Indirect immunofluorescence was performed using secondary antibodies conjugated with Alexa-647 anti-Mouse (Invitrogen, Cat. A-21236), Alexa-555 anti-Rat (Invitrogen, Cat. A-21434) and Alexa-488 anti-Rabbit (Invitrogen, Cat. A-11034). 10 mg/ml Hoechst 33342 stock solution was purchased from Life Technologies (Cat. H3570). 20xPBS was purchased from Santa Cruz Biotechnology (Cat. SC-362299). 30% hydrogen peroxide solution was purchased from Sigma-Aldrich (Cat. 216763). PBS-based Odyssey blocking buffer was purchased from LI-COR (Cat. 927-40150). All reagents for the Leica BOND RX were purchased from Leica

Microsystems. HCS CellMask Red Stain and Mito-tracker Green stains were purchased from ThermoFischer (catalog numbers H32712, R37112 and M751 respectively).

## Pre-processing and pre-staining tissues for t-CyCIF

### *Automated dewaxing, rehydration and pre-staining*

Pre-processing of FFPE tissue and tumor slices mounted on slides was performed on a Leica BOND RX automated stained using the following protocol:

| Step | Reagent             | Supplier | Incubation (min) | Temp. (°C) |
|------|---------------------|----------|------------------|------------|
| 1    | *No Reagent         | N/D      | 30               | 60         |
| 2    | BOND Dewax Solution | Leica    | 0                | 60         |
| 3    | BOND Dewax Solution | Leica    | 0                | R.T.       |
| 4    | BOND Dewax Solution | Leica    | 0                | R.T.       |
| 5    | 200 proof ethanol   | User*    | 0                | R.T.       |
| 6    | 200 proof ethanol   | User*    | 0                | R.T.       |
| 7    | 200 proof ethanol   | User*    | 0                | R.T.       |
| 8    | Bond Wash Solution  | Leica    | 0                | R.T.       |
| 9    | Bond Wash Solution  | Leica    | 0                | R.T.       |
| 10   | Bond Wash Solution  | Leica    | 0                | R.T.       |
| 11   | Bond ER1 solution   | Leica    | 0                | 99         |
| 12   | Bond ER1 solution   | Leica    | 0                | 99         |
| 13   | Bond ER1 solution   | Leica    | 20               | 99         |
| 14   | Bond ER1 solution   | Leica    | 0                | R.T.       |
| 15   | Bond Wash Solution  | Leica    | 0                | R.T.       |
| 16   | Bond Wash Solution  | Leica    | 0                | R.T.       |
| 17   | Bond Wash Solution  | Leica    | 0                | R.T.       |
| 18   | Bond Wash Solution  | Leica    | 0                | R.T.       |
| 19   | Bond Wash Solution  | Leica    | 0                | R.T.       |
| 20   | IF Block            | User*    | 30               | R.T.       |
| 21   | Antibody Mix        | User*    | 60               | R.T.       |
| 22   | Bond Wash Solution  | Leica    | 0                | R.T.       |
| 23   | Bond Wash Solution  | Leica    | 0                | R.T.       |
| 24   | Bond Wash Solution  | Leica    | 0                | R.T.       |
| 25   | Hoechst Solution    | User*    | 30               | R.T.       |
| 26   | Bond Wash Solution  | Leica    | 0                | R.T.       |
| 27   | Bond Wash Solution  | Leica    | 0                | R.T.       |
| 28   | Bond Wash Solution  | Leica    | 0                | R.T.       |

Steps 2-10: Dewaxing & Rehydration with Leica Bond Dewax Solution Cat. AR9222.

Steps 11-14: Antigen retrieval with BOND Epitope Retrieval solution 1 (ER1; Cat. AR9961)

Steps 15-19: Washing with Leica Bond Wash Solution (Cat. AR9590).

Steps 20-28 Pre-staining procedures as shown in Figure 1A:

Step 20: IF Block - Immunofluorescence blocking in Odyssey blocking buffer (LI-COR, Cat. 927401)

Step 21: Antibody Mix - Incubation with secondary antibodies diluted in Odyssey blocking buffer

Step 25: Staining with Hoechst 33342 at 2 µg/ml (w/v) in in Odyssey blocking buffer

### ***Manual dewaxing, rehydration and pre-staining.***

In our experience dewaxing, rehydration and pre-staining can also be performed manually with similar results. For manual pre-processing, FFPE slides were first incubated in a 60°C oven for 30 minutes. To completely remove paraffin, slides were placed in a glass slide rack and then immediately immersed in Xylene in a glass staining dish (Wheaton 900200) for 5 min and subsequently transferred to another dish containing fresh Xylene for 5 min. Rehydration was achieved by sequentially immersing slides, for 3 min each, in staining dishes containing 100% ethanol, 90% ethanol, 70% ethanol, 50% ethanol, 30% ethanol, and then in two successive 1xPBS solutions. Following rehydration, slides were placed in a 1000 ml beaker filled with 500 ml citric acid, pH 6.0, for antigen retrieval. The beaker containing slides and citric acid buffer was microwaved at low power until the solution was at a boiling point and maintained at that temperature for 10 min. After cooling to room temperature, slides were washed 3 times with 1xPBS in vertical staining jars.

### ***Prestaining***

Dewaxed specimens were blocked by incubation with Odyssey blocking buffer for 30 mins by applying the buffer to slides as a 250-500 µl droplet at room temperature; evaporation was minimized by using a slide moisture chamber (Scientific Device Laboratory, 197-BL). Slides were then pre-stained by incubation with diluted secondary antibodies (listed above) for 60 minutes, followed by washing 3 times with 1xPBS. Finally, slides were incubated with Hoechst 33342 (2 µg/ml) in 250-500 µl Odyssey blocking buffer for 30 min in a moisture chamber and washed 3 times with 1xPBS in vertical staining jars. After imaging, cells were subjected to a round of fluorophore inactivation (see below). Following fluorophore inactivation, slides were washed 4 times with 1x PBS by dipping them in a series of vertical staining jars to remove residual inactivation solution.

### ***Performing cyclic immunofluorescence***

All primary antibodies (fluorophore-conjugated and unconjugated) were diluted in Odyssey blocking buffer. Slides carrying tissues that had been subjected to pre-staining, or to a previous t-CyCIF stain and bleach

cycle, were incubated at 4°C for ~12 hr with diluted primary or fluorophore-conjugated antibody (250-500 µl per slide) in a moisture chamber. Long incubation times were a matter of convenience and many antibodies only require short incubation with sample. Slides were then washed four times in 1x PBS by dipping in a series of vertical staining jars.

For indirect immunofluorescence, slides were incubated in diluted secondary antibodies in a moisture chamber for 1 hr at room temperature followed by four washes with 1xPBS. Slides were incubated in Hoechst 33342 at 2 µg/ml in Odyssey blocking buffer for 15 min at room temperature, followed by four washes in 1xPBS. Stained slides were mounted prior to image acquisition (see the Mounting section below).

### ***Primary antibodies***

For t-CyCIF, we selected commercial antibodies previously validated by their manufacturers for use in immunofluorescence, immunocytochemistry or immunohistochemistry (IF, ICC or IHC). When possible, we checked antibodies on reference tissue known to express the target antigen, such as immune cells in tonsil tissue or tumor-specific markers in tissue microarrays. The staining patterns for antibodies with favorable signal-to-noise ratios were compared to those previously reported for that antigen by conventional antibodies. An updated list of all antibodies tested to date can be found at <http://www.cycif.org>. In current practice, the degree of validation is quantified on a level between 0 and 2: “Level 0” represents antibodies for which staining we observed staining in tissues for which the antigen is thought to be present based on published data; “Level 1” represents the expected pattern of positive staining in a limited number of tissues types (e.g. CD4 antibody in tonsil tissue alone); “Level 2” represents the expected pattern of positive staining in all tissues or tumor types been tested (N>= 3). Higher levels will be assigned in the future to antibodies that have undergone extensive validation; for example, side-by side comparison of against an established IHC positive control. Overall, the validation of primary antibodies used in this study is not meaningfully greater what has already been done by commercial vendors using conventional IF or IHC.

### ***Mounting & de-coverslipping***

Immediately prior to imaging, slides were mounted with 1xPBS or, if imaging was expected to take longer than 30 minutes, for example, in the case of samples larger than 2-4 cm<sup>2</sup> (corresponding to about 200 fields of view

with a 10X objective) PBS was supplemented with 10% Glycerol. Slides were covered using 24 x 60mm No. 1 coverslips (VWR 48393-106) to prevent evaporation while facilitating subsequent de-coverslipping via gravity. Following image acquisition, slides were placed in a vertical staining jar containing 1xPBS for at least 15 min. Coverslips were released from slides (and the tissue sample) via gravity as the slides were slowly drawn out of the staining jar.

### ***Fluorophore inactivation (bleaching)***

After imaging, fluorophores were inactivated by placing slides horizontally in 4.5% H<sub>2</sub>O<sub>2</sub> and 24 mM NaOH made up in PBS for 1 hour at RT in the presence of white light. Following fluorophore inactivation, slides were washed 4 times with 1x PBS by dipping them in a series of vertical staining jars to remove residual inactivation solution.

### **Image acquisition**

Stained slides from each round of CyCIF were imaged with a CyteFinder slide scanning fluorescence microscope (RareCyte Inc. Seattle WA) using either a 10X (NA=0.3) or 40X long-working distance objective (NA = 0.6). Imager5 software (RareCyte Inc.) was used to sequentially scan the region of interest in 4 fluorescence channels. These channels are referred to by the manufacturer as a: (i) “DAPI channel” with an excitation filter having a peak of 390 nm and half-width of 18nm and an emission filter with a peak of 435nm and half-width of 48nm; (ii) “FITC channel” having a 475nm/28nm excitation filter and 525nm/48nm emission filter (iii); “Cy3 channel” having a 542nm/27nm excitation filter and 597nm/45nm emission filter and (iv); “Cy5 channel” having a 632nm/22nm excitation filter and 679nm/34nm emission filter. Imaging was performed with 2x2 binning to increase sensitivity, reduce exposure time and reduce photo bleaching. We have tested slide scanners from several other manufacturers (e.g. a Leica Aperio Digital Pathology Slide Scanner, GE IN-Cell Analyzer 6000 and GE Cytell Cell Imaging System) and found that they too can be used to acquire images from samples processed by t-CyCIF. Slides can also be analyzed on conventional microscopes, but the field of view is typically smaller, and an automated stage is required for accurate stitching of individual fields of view into a complete image of a tissue.

### **Super-resolution microscopy**

We acquired 3D-SIM images on a Deltavision OMX V4 Blaze (GE Healthcare) with a 60x/1.42N.A. Plan Apo oil immersion objective lens (Olympus) and three Edge 5.5 sCMOS cameras (PCO). Two to three micron z-stacks were collected with a z-step of 125 nm or 250 nm and with 15 raw images per plane. To minimize spherical aberration, immersion oil matching was used for each sample as described by Hiraoka et al.<sup>53</sup> except that we measured point spread functions of point-like structures within the sample as opposed to beads on a separate slide. DAPI fluorescence was excited with a 405nm laser and collected with a 477/35 emission filter, Alexafluor 488 with a 488nm laser and a 528/48 emission filter, Alexa fluor 555 with a 568nm laser and a 609/37 emission filter, and Alexa fluor 647 with a 642nm laser and a 683/40 emission filter. All stage positions were saved in softWorX to be revisited later. Super-resolution images were computationally reconstructed from the raw data sets with a channel-specific, measured optical transfer function and a Wiener filter constant of 0.001 using CUDA-accelerated 3D-SIM reconstruction code based on Gustafsson et al.<sup>54</sup> A comparison of properties of different imaging platforms used in this study are shown in Table 1.

## **Image processing**

Quantitative analysis of tissue images is challenging, in large part because cells are close together and embedded in a complex extracellular environment. Background can be uneven across large images and signal-to-noise ratios relatively low, particularly in the case of tissues with high auto-fluorescence and low signal antibodies (e.g. phospho-protein antibodies). We have only started to tackle these issues in the case of high dimensional t-CyCIF data and users of our experimental methods are encouraged to seek alternative approaches.

### ***Background subtraction and image registration***

Background subtraction was performed using the previously established rolling ball algorithm (with a 50-pixel radius) in ImageJ. Adjacent background-subtracted images from the same sample were then registered to each other using an ImageJ script as described previously<sup>20</sup>. All images with 2x2 binning in acquisition were partially deconvoluted with unsharp masking. DAPI images from each cycle were used to generate reference coordinates by Rigid-body transformation. To generate virtual hyper-stacked images, the transformed coordinates were applied to images from four channel imaging of each t-CyCIF cycle.

## ***Single-cell segmentation & quantification***

To obtain intensity values for single cells, images were segmented using a previously described<sup>20</sup> Watershed algorithm based on nuclear staining by Hoechst 33342. Images were initially thresholded using the OTSU algorithm and binarized in the Hoechst channel, which was then used to generate a nuclear mask image. The mask images were then subjected to the Watershed algorithm in ImageJ to obtain single-cell regions of interest (ROIs). From the nuclei, the cytoplasm was captured by centripetal expansion of either of 3 pixels in images obtained with a 10X objective or of 6 pixels in images obtained with a 40X objective, until cell reaching the cell boundaries (cell membrane). The cytoplasm was then defined as the region between the cell membrane and the nucleus. Following cell segmentation, these cell boundaries were used to compute mean and integrated intensity values from all channels. Because ROIs are (initially) defined only by the nuclear signal, this approach is likely to over- or under- segment cells with irregular shapes, which can lead to nuclear, cytosolic or cell membrane “signal contamination” between neighboring and/or stacked cells. Further experimental (e.g. including membrane markers to guide whole-cell rather than nuclear-only segmentation) and analytical algorithms to more accurately segment individual cells (e.g. using deep learning methods to register and apply additional features) would help to improve segmentation. All imageJ scripts used in this manuscript can be found in our Github repository (<https://github.com/sorgerlab/cycif>).

## ***Shading and flat-field correlation***

The BaSiC algorithm<sup>23</sup> was used for shade and flat-field correction to generate stitched montage images. Additional information can be found on the BaSiC website (<https://www.helmholtz-muenchen.de/icb/research/groups/quantitative-single-cell-dynamics/software/basic/index.html>). An example of the performance of BaSiC is shown in Figure 2-figure supplement 1. The ImageJ plugin was applied for whole image stacks using the default options.

## ***Time considerations***

We believe that the time invested in t-CyCIF as compared to single cycle IF has to be placed into the context of the much greater amount of data generated from a t-CyCIF experiment. It is also important to note that t-CyCIF is slow when only one sample is processed (something we now mention in the text) but that it can easily be

performed in parallel on multiple samples. As a practical example, we usually stain 30 slides in parallel (each involving 200 fields of view); in the case of TMAs, >80 samples can be assembled on each slide, so up to 2400 samples can be processed in parallel. With a single scanner, 30 slides can be scanned (average scan time~10 mins) in about 6 hours. Photo-inactivation and washing steps take ~1 to 1.5 hours, after which an additional round of staining is initiated. As a matter of convenience, we usually perform staining overnight. Hence, one user can generate data for 90 channels and 1800 images per day. Thus, ~10 work days are required to generate 900 channels/18,000 images. Further time needs to be allotted for computing registration and stitching (~12-18 hours of computing time) and quantification (~24-48 hours computing time, depending on cell density). Overall, we believe that this is a reasonable level of throughput and we have put almost no effort into speeding it up thus, because we are currently conceiving improved analytical strategies to manage the enormous amount of data that is generated. We also note that the throughput of t-CyCIF compares favorably with other tissue-imaging platforms and single-cell transcriptome profiling.

### **Analysis of tissue integrity over cycles**

We purchased a TMA (MTU481, Biomax Inc, [https://www.biomax.us/tissue-arrays/Multiple\\_Organ/MTU481](https://www.biomax.us/tissue-arrays/Multiple_Organ/MTU481)) to test the impact of cycle number on tissue integrity. Images were captured and processed as described above. The registered image stacks were then segmented and nuclei counts for each core and each cycle were recorded. All values were normalized to the number of nuclei from the first cycle of a particular core biopsy and the fractional normalized nuclei count shown at each staining cycle.

### **Calculation of intensity overlap between different cycles and dynamic range**

To compare staining patterns between different cycles within the same specimen, we calculated overlap integrals. First, we determined the distribution of intensity data averaged over each single cell and for each t-CyCIF cycles. The area under the curve of these distributions was calculated by trapezoidal numerical integration. The ratio of the AUC for different cycles, samples or antibodies was then calculated and reported as an overlap score.

The dynamic range (DR) of fluorescence intensities for a given antibody was calculated as a rough estimate of the signal-to-noise ratio; SNR. The calculation was performed as follows: first, pixel-by-pixel

intensity data was extracted from a t-CyCIF image; the DR was then calculated as the ratio of the intensities of the 95<sup>th</sup> and 5<sup>th</sup> percentile values and represented on a log scale. High DR values indicate a favorable SNR. Intensities below the 5<sup>th</sup> percentile were considered to be background noise.

### High-dimensional single-cell analysis by t-SNE

Raw intensity data generated from registered and segmented images were imported into Matlab and converted to comma separated value (csv) files. The viSNE implementation of t-SNE and EMGM algorithms from the CYT single-cell analysis package were obtained from the Pe'er laboratory at Columbia University<sup>55</sup>. Intensity-based measurements (such as flow cytometry or imaging cytometry) of protein expression have approximately log-normal distribution<sup>56</sup>, hence, t-CyCIF raw intensity values were first transformed in log or in inverse hyperbolic sine (*asinh*) using the default Matlab function or the *CYT* package<sup>55</sup>, respectively. Between-sample variation was normalized on a per-channel basis by using the *CYT* package to align intensity measurements that encompass values between 1<sup>st</sup> and the 99th percentile. Data files were aggregated and used to generate viSNE plots. All viSNE/t-SNE analyses used the following settings: perplexity -30, epsilon =500, lie factor =4 for initial 100 iterations and lie factor -1 for remaining iterations.

### Regional and neighboring analysis using K-nearest neighbors (KNN) methods

To determine whether PD-1 and PD-L1 expressing cells are sufficiently close for the receptor and ligand to interact, the spatial densities for PD1<sup>+</sup> and PDL1<sup>+</sup> cells were estimated using a k nearest neighbors (kNN) model with k=4, corresponding to a ~10  $\mu$ m smoothing window. Since the density in space of the PD1<sup>+</sup> or PDL1<sup>+</sup> cells at any point in that space is proportional to the probability of that cell having a centroid there, the co-occurrence probability at a point was therefore proportional to the product of the spatial densities for both cell types at a point. To normalize for the difference in total PDL1+ or PD1+ cells between regions of the tissue corresponding to tumor and stroma, we calculated spatial probabilities for the different regions in the specimen separately. Figure 9-figure supplement 1 shows the distribution of co-occurrence densities for stroma and tumor relevant to a clear-cell carcinoma shown in Figure 9.

### Calculating Shannon entropy values

Images were divided into regular grids and 1000 cells from each region used to calculate the non-parametric Shannon entropy as follows:

$$E1(s) = -\sum_i s_i^2 \log(s_i^2)$$

where  $E1(s)$  is the Shannon entropy of signal  $s$ ;  $s_i$  is the per-pixel intensity of signal  $s$  at a given point.

Normalized Shannon entropy as calculated as  $E_{\text{normalized}} = E_{\text{region}} / E_{\text{sample}}$

### **Expectation–Maximization Gaussian mixtures (EMGM) clustering**

To determine an appropriate number of clusters ( $k$ ) for analysis of the GBM tumor shown in Figures 11 and 12 and in Figure 12-figure supplement 2 we determined negative log-likelihood-ratios for various values of  $k$ . For each choice of cluster number  $n$ , the likelihood-ratio was calculated for a Gaussian mixture model with  $n = k-1$  and with  $n = k$  and the ratio then plotted relative to  $k$ . The EMGM algorithm was initialized 30 times for each value of  $k$  and it converged in all instances. The inflection at  $k = 8$  (red arrow) suggests that inclusion of additional clusters ( $k > 8$ ) explains a smaller, distinct source of variation in the data (Figure 12-figure supplement 1). As an alternative,  $k = 12$  was also explored in Figure 12-figure supplement 2. Intensity values from all antibody channels (plus area and Hoechst intensity) were used for clustering.

### **Data availability**

Intensity data used to generate figures is available in supplementary materials and can be downloaded from the HMS LINCS website (<http://www.cycif.org>.)

### **Code availability**

Scripts and software used in this study are available at the Sorgerlab GitHub Repositories (<https://github.com/sorgerlab>).<sup>57,58</sup>

### **Image availability**

All images can be accessed through HMS LINCS page (<http://www.cycif.org>). Note that OMERO Web clients do not yet support viewing of very large stitched images and only representative image fields are therefore available via the web client. We and others are working on software that will enable the analysis and distribution of very large images via an OMERO client.

## FIGURE LEGENDS

**Figure 1. Steps in the t-CyCIF process. (A)** Schematic of the cyclic process whereby t-CyCIF images are assembled via multiple rounds of four-color imaging. **(B)** Image of human tonsil prior to pre-staining and then over the course of three rounds of t-CyCIF. The dashed circle highlights a region with auto-fluorescence in both green and red channels (used for Alexa-488 and Alexa-647 respectively) and corresponds to a strong background signal. With subsequent inactivation and staining cycles (three cycles shown here), this background signal becomes progressively less intense; the phenomenon of decreasing background signal and increasing signal-to-noise ratio as cycle number increases was observed in several staining settings (see also Figure 1-figure supplement 1).

**Figure 2. Multi-scale imaging of t-CyCIF specimens. (A)** Bright-field H&E image of a metastasectomy specimen that includes a large metastatic melanoma lesion and adjacent benign tissue. The H&E staining was performed after the same specimen had undergone t-CyCIF. **(B)** Representative t-CyCIF staining of the specimen shown in (A) stitched together using the *Ashlar* software from 165 successive CyteFinder fields using a 20X/0.8NA objective **(C)** One field from (B) at the tumor-normal junction demonstrating staining for S100-positive malignant cells,  $\alpha$ -SMA positive stroma, T lymphocytes (positive for CD3, CD4 and CD8), and the proliferation marker phospho-RB (pRB). **(D)** A melanoma tumor imaged on a GE INCell Analyzer 6000 confocal microscope to demonstrate sub-cellular and sub-organelle structures. This specimen was stained with phospho-Tyrosine (pTyr), Lamin A/C and p-Aurora A/B/C and imaged with a 60X/0.95 objective. pTyr is localized in membrane in patches associated with receptor-tyrosine kinase, visible here as red punctate structures. Lamin A/C is a nuclear membrane protein that outlines the vicinity of the cell nucleus in this image. Aurora kinases A/B/C coordinate centromere and centrosome function and are visible in this image bound to chromosomes within a nucleus of a mitotic cell in prophase (yellow arrow). **(E)** Staining of a melanoma sample using the OMX Blaze structured illumination microscope with a 60X/1.42NA objective shows heterogeneity of structural proteins of the nucleus, including as Lamin B and Lamin A/C (indicated by yellow arrows) and part of the nuclear pore complex (NUP98) that measures ~120 nm in total size and indirectly allows the

visualization of nuclear pores (indicated by non-continuous staining of NUP98). **(F)** Staining of a patient-derived mouse xenograft breast tumor using the OMX Blaze with a 60x/1.42NA objective shows a spindle in a mitotic cell (beta-tubulin in red) as well as vesicles staining positive for VEGFR2 (in cyan) and punctuate expression of the EGFR in the plasma membrane (in green).

**Figure 3. t-CyCIF imaging of normal tissues (A)** Selected images of a tonsil specimen subjected to 10-cycle t-CyCIF to demonstrate tissue, cellular, and sub-cellular localization of tissue and immune markers (see Supplement file 1 for a list of antibodies). **(B)** Selected cycles from (A) demonstrating sub-nuclear features (Ki67 staining, cycle 1), immune cell distribution (cycle 2), structural proteins (E-Cadherin and Vimentin, cycle 5) and nuclear vs. cytosolic localization of transcription factors (NF-kB, cycle 6). **(C)** Five-cycle t-CyCIF of human skin to show the tight localization of some auto-fluorescence signals (Cycle 0), the elimination of these signals after pre-staining (Cycle 1), and the dispersal of rare cell types within a complex layered tissue (see Supplement file 1 for a list of the antibodies).

**Figure 4. Efficacy of fluorophore inactivation and preservation of tissue integrity. (A)** Exemplary image of a human tonsil stained with PCNA-Alexa 488 that underwent 0, 15, 30 or 60 minutes of fluorophore inactivation. **(B)** Effect of bleaching duration on the distribution of anti-PCNA-Alexa 488 staining intensities for samples used in (A). The distribution is computed from mean values for the fluorescence intensities across all cells in the image that were successfully segmented. The gray band denotes the range of background fluorescence intensities (below 6.2 in log scale). **(C)** Effect of bleaching duration on mean intensity for nine antibodies conjugated to Alexa fluor 488, efluor 570 or Alexa fluor 647. Intensities were determined as in (B). The gray band denotes the range of background fluorescence intensities. **(D)** Impact of t-CyCIF cycle number on tissue integrity for four exemplary tissue cores. Nuclei present in the first cycle are labelled in red and those present after the 10th cycle are in green. The numbers at the bottom of the images represent nuclear counts in cycle 1 (red) and cycle 10 (green), respectively. **(E)** Impact of t-CyCIF cycle number on the integrity of a TMA containing 48 biopsies obtained from 16 different healthy and tumor tissues (see Methods for TMA details) stained with 10 rounds of t-CyCIF. The number of nuclei remaining in each core was computed relative to the

starting value; small fluctuations in cell count explain values  $> 1.0$  and arise from errors in image segmentation. Data for six different breast cores is shown to the right. **(F)** Nuclear staining of a melanoma specimen subjected to 20 cycles of t-CyCIF emphasizes the preservation of tissue integrity (22%  $\pm$  4%). **(G)** Selected images of the specimen in (F) from cycles 0, 5, 15 and 20.

**Figure 5. Design of a 16-cycle experiment used to assess the reliability of t-CyCIF data.** **(A)** t-CyCIF experiment involving two immediately adjacent tissue slices cut from the same block of tonsil tissue (Slide A and Slide B). The antibodies used in each cycle are shown (antibodies are described in Supplement file 2). Highlighted in blue are cycles in which the same antibodies were used on slides A and B at the same time to assess reproducibility. Highlighted in yellow are cycles in which antibodies targeting PCNA, Vimentin and Tubulin were used repeatedly on both slides A and B to assess repeatability. Blue arrows connecting Slides A and B show how antibodies were swapped among cycles. **(B)** Representative images of Slide A (top panels) and Slide B specimens (bottom panels) after each t-CyCIF cycle. The color coding highlighting specific cycles is the same as in A.

**Figure 6. Impact of cycle number on repeatability, reproducibility and strength of t-CyCIF immunostaining.** **(A)** Plots on left: comparison of staining intensity for anti-PCNA Alexa 488 (top), anti-vimentin Alexa 555 (middle) and anti-tubulin Alexa 647 (bottom) in cycle 3 vs. 16 and cycle 7 vs. 12 of the 16-cycle t-CyCIF experiment show in Figure 5. Intensity values were integrated across whole cells and the comparison is made on a cell-by-cell basis. Spearman's correlation coefficients are shown. Plots in middle: intensity distributions at cycles 3 (blue), 7 (yellow), 12 (red) and 16 (green); intensity values were integrated across whole cells to construct the distribution. Box plots to right: estimated dynamic range at four cycle numbers 3, 7, 12, 16. Red lines denote median intensity values (across 56 frames), boxes denote the upper and lower quartiles, whiskers indicate values outside the upper/lower quartile within 1.5 standard deviations, and red dots represent outliers. **(B)** Representative images showing anti-tubulin Alexa 647 staining at four t-CyCIF cycles; original

images are shown on the left (representing the same exposure time and approximately the same illumination) and images scaled by histogram equalization to similar intensity ranges are shown on the right. **(C)** Image for anti- CD45RO-Alexa 555 at cycles 5 and 15 scaled to similar intensity ranges as described in (B); the dynamic range (DR) of the cycle 15 image is ~3.3-fold lower than that of the Cycle 5 image, but shows similar morphology. **(D)** Intensity distributions for selected antibodies that were used in different cycles on Slides A and B. Colors denote the degree of concordance between the slides ranging from high (overlap >0.8 in yellow; PCNA), slightly increased or decreased with increasing cycle (overlap 0.6 to 0.8 in light blue or light red; S100 and SMA) or substantially increased or decreased (overlap < 0.6 in red or blue; VEGFR2 and CD45RO). **(E)** Summary of effects of cycle number on antibody staining based on the degree of overlap in intensity distributions (the overlap integral); color coding is the same as in (D). **(F)** Effect of cycle number and specimen identity on overlap integrals for all antibodies and all cycles assayed. The red line denotes the median intensity value, boxes denote the upper/lower quartiles, and whiskers indicate values outside the upper/lower quartile and within 1.5 standard deviations, and red dots represent outliers.

**Figure 7. t-CyCIF of a large resection specimen from a patient with pancreatic cancer.** **(A)** H&E staining of pancreatic ductal adenocarcinoma (PDAC) resection specimen that includes portions of cancer and non-malignant pancreatic tissue and small intestine. **(B)** The entire sample comprising 143 stitched 10X fields of view is shown. Fields that were used for downstream analysis are highlighted by yellow boxes. **(C)** A representative field of normal intestine across 8 t-CyCIF rounds; see Supplement file 3 for a list of antibodies. **(D)** Segmentation data for four antibodies; the color indicates fluorescence intensity (blue = low, red = high). **(E)** Quantitative single-cell signal intensities of 24 proteins (rows) measured in  $\sim 4 \times 10^3$  cells (columns) from panel (C). The Pearson correlation coefficient for each measured protein with E-cadherin (at a single-cell level) is shown numerically. Known dichotomies are evident such as anti-correlated expression of epithelial (E-Cadherin) and mesenchymal (Vimentin) proteins. Proteins highlighted in red are further analyzed in Figure 8.

**Figure 8. High-dimensional single-cell analysis of human pancreatic cancer sample with t-CyCIF. (A)** t-SNE plots of cells derived from small intestine (left) or the PDAC region (right) of the specimen shown in Figure 7 with the fluorescence intensities for markers of proliferation (PCNA and Ki67) and signaling (pERK and  $\beta$ -catenin) overlaid on the plots as heat maps. In both tissue types, there exists substantial heterogeneity: circled areas indicate the relationship between pERK and  $\beta$ -catenin levels in cells and represent positive (“a”), negative (“b”) or no association (“c”) between these markers. **(B)** Representative frames of normal pancreas and pancreatic ductal adenocarcinoma from the 8-cycle t-CyCIF staining of the same resection specimen from Figure 7. **(C)** t-SNE representation and clustering of single cells from normal pancreatic tissue (red), small intestine (blue) and pancreatic cancer (green). Projected onto the origin of each cell in t-SNE space are intensity measures for selected markers demonstrating distinct staining patterns. **(D)** Fluorescence intensity distributions for selected markers in small intestine, pancreas and PDAC.

**Figure 9. Spatial distribution of immune infiltrates and checkpoint proteins. (A)** Low magnificant image of a clear cell renal cancer subjected to 12-cycle t-CyCIF (see Supplement file 4 for a list of antibodies). Regions high in  $\alpha$ -smooth muscle actin ( $\alpha$ -SMA) correspond to stromal components of the tumor, those low in  $\alpha$ -SMA represent regions enriched for malignant cells. **(B)** Representative images from selected t-CyCIF channels are shown. **(C)** Quantitative assessment of total lymphocytic cell infiltrates ( $CD3^+$  cells),  $CD8^+$  T lymphocytes, cells expressing PD-1 or its ligand PD-L1 or the VEGFR2 for the entire tumor or for  $\alpha$ -SMA<sup>high</sup> and  $\alpha$ -SMA<sup>low</sup> regions. VEGFR2 is a protein primarily expressed in endothelial cells and is targeted in the treatment of renal cell cancer. **(D)** Density plot for CD3 and CD8 expression on single cells in the tumor (left) or stromal domains (right). **(E)** Centroids of  $CD3^+$  or  $CD3^+CD8^+$  cells in blue or dark blue as well as cells staining as SMA<sup>high</sup> or SMA<sup>low</sup> (gray and light-gray, respectively) used to define the stromal and tumor regions. **(F)** Centroids of PD-1<sup>+</sup> and PD-L1<sup>+</sup> cells are shown in red and green, respectively. **(G)** Results of a K-nearest neighbor algorithm used to compute areas in which PD-1<sup>+</sup> and PD-L1<sup>+</sup> cells lie within  $\sim 10 \mu m$  of each other and with high spatial density (in yellow) and thus, are potentially positioned to interact at a molecular level

**Figure 10. Eight-cycle t-CyCIF of a tissue microarray (TMA) including 13 normal tissues and corresponding tumor types.** The TMA includes normal tissue types, and corresponding high and low grade tumors, for a total of 39 specimens (see Supplement file 3 for antibodies and Supplement file 5 for specifications of the TMA). **(A)** Selected images of different tissues illustrating the quality of t-CyCIF images (additional examples shown in Figure 9-figure supplement 1; full data available online at [www.cycif.org](http://www.cycif.org)). **(B)** t-SNE plot of single-cell intensities of all 39 cores; data were analyzed using the CYT package (see materials and methods). Tissues of origin and corresponding malignant lesions were labeled as follows: BL, bladder cancer; BR, breast cancer CO, Colorectal adenocarcinoma, KI, clear cell renal cancer, LI, hepatocellular carcinoma, LU, lung adenocarcinoma, LY, lymphoma, OV, high-grade serous adenocarcinoma of the ovary, PA, pancreatic ductal adenocarcinoma, PR, prostate adenocarcinoma, UT, uterine cancer, SK, skin cancer (melanoma), ST, stomach (gastric) cancer. Numbers refer to sample type; “1” to normal tissue, “2” to -grade tumors and “3” to high grade tumors. **(C)** Detail from panel B of normal kidney tissue (KI1) a low-grade tumor (KI2) and a high-grade tumor (KI3) **(D)** Detail from panel B of normal ovary (OV1) low-grade tumor (OV2) and high-grade tumor (OV3). **(E)** t-SNE plot from Panel B coded to show the distributions of all normal, low grade and high-grade tumors. **(F)** tSNE clustering of normal pancreas (PA1) and pancreatic cancers (low grade, PA2, and high grade, PA3) and normal stomach (ST1) and gastric cancers (ST2 and ST3, respectively) showing intermingling of high grade cells.

**Figure 11. Molecular heterogeneity in a single GBM tumor.** **(A)** Representative low magnification image of a GBM specimen generated from 221 stitched 10X frames; the sample was subjected to 10 rounds of t-CyCIF using antibodies listed in Supplement file 6. **(B)** Magnification of frame 152 (whose position is marked with a white box in panel A) showing staining of pERK, pRB and EGFR; lower panel shows a further magnification to allow single cells to be identified. **(C)** Normalized Shannon entropy of each of 221 fields of view to determine the extent of variability in signal intensity for 1000 cells randomly selected from that field for each of the antibodies shown. The size of the circles denotes the number of cells in the field and the color represents the

value of the normalized Shannon entropy (data are shown only for those fields with more than 1,000 cells; see Methods for details).

**Figure 12. Spatial distribution of molecular phenotypes in a single GBM. (A)** Clustering of intensity values for 30 antibodies in a 10-cycle t-CyCIF analysis integrated over each whole cell based on images shown in Figure 11. Intensity values were clustered using expected-maximization with Gaussian mixtures (EMGM), yielding eight clusters, of which four clusters accounted for the majority of cells. The intensity scale shows the average level for each intensity feature in that cluster. The number of cells in the cluster is shown as a percentage of all cells in the tumor (bottom of panel). An analogous analysis is shown for 12 clusters in Figure 12-figure supplement 2. **(B)** EMGM clusters (in color code) mapped back to the positions of individual cells in the tumor. The coordinate system is the same as in Figure 11A. The positions of seven macroscopic regions (R1-R7) representing distinct lobes of the tumor are also shown. **(C)** Magnified view of Frame 147 from region R5 with EMGM cluster assignment for each cell in the frame; dots represent the centroids of single cells. **(D)** The proportional representation of EMGM clusters in each tumor region as defined in panel (B).

## SUPPLEMENTARY FIGURE LEGNEDS

**Figure 1-figure supplement 1. Reduction in background signal intensity with repeated cycles of bleaching.** (A-C) Intensity distributions for three fluorescence channels (FITC/Alexa-488, Cy3/Alexa-555 and Cy5/Alexa-647) prior to pre-bleaching (blue), and after 1, 2 or 3 cycles of bleaching (black, red and green lines, respectively). With increasing number of bleaching cycles, the background signal is reduced up to 10-fold.

**Figure 1-figure supplement 2. t-CyCIF using antibodies labelled with Zenon Alexa-555 Fab fragments.** A human tonsil specimen was stained with unconjugated anti-CD11b antibody and then with Alexa-488 conjugated anti-Rabbit secondary antibody (left) or with the same anti-CD11b antibody following incubation with Zenon Alexa-555 (ThermoFischer; right). The Zenon Fab fragments generate non-covalent immune complexes that “label” the primary antibody in a manner that is stable to subsequent processing steps.

**Figure 2-figure supplement 1. Flat-field and shading correction for stitched images.** A large melanoma specimen (same as shown specimen as in Figure 2A- B) was imaged with a 20X/0.8NA objective on a CyteFinder, and a total 165 frame images were assembled to one image using the *Ashlar* algorithm. Representative channels (Hoechst 33342 and S100-Alexa-488) of the stitched images before (left) and after (right) correction for uneven illumination using the BaSiC algorithm (Peng et al., 2017) (see Methods).

**Figure 2-figure supplement 2. OMX super-resolution t-CyCIF images.** (A) Single-channel images for the composite image shown in Figure 2E. This melanoma sample was imaged using the OMX Blaze structured illumination microscope with 60X/1.42NA objectives. (B) . Single-channel images for the composite image shown in Figure 2F. This breast cancer xenograft sample was also imaged using the OMX Blaze.

**Figure 4-figure supplement 1. Impact of bleaching time on fluorophore inactivation.** Intensity distributions for specimens stained with an antibody against Ki67 coupled to the following fluorophores: (A) Alexa-488, (B)

Alexa-570 and (C) Alexa-647 prior to bleaching (blue curves) and after 15, 30 or 45 minutes of bleaching (black, red and green curves respectively). The distributions were calculated from the average fluorescence intensities of single cells as determined after image segmentation.

**Figure 6-figure supplement 1. Comparison of staining intensities across different cycles at a single-cell**

**level.** Images come from the antibody-swap and repeat experiment showing in Figures 5 and 6. Comparison of single-cell level intensities for (A) PCNA Alexa-488, (B) Vimentin Alexa-555 and (C) Tubulin Alexa-647 stained in four different cycles (cycle 3, 7, 12 and 16). For any given cycle pair, single-cell intensities density plots are shown. Spearman's correlation coefficients ( $\rho$ ) and the mean intensity ratios between 2 cycles are shown.

**Figure 7-figure supplement 1. t-CyCIF for examining large resection specimens of a human pancreatic**

**cancer. (A)** Representative frame of small intestine from the PDAC resection shown in Figure 7 with images for PCNA, beta-catenin, Ki67 and pERk shown. These frames correspond to the segmented panels shown in 7D. **(B)** Creation of nuclear masks following identification of nuclei. Left panel: Hoechst image from t-CyCIF cycle 1 on the PDAC resection sample; middle panel: a binarized nuclear mask from cycle 8 (the final cycle in this t-CyCIF experiment); right panel: the overlay image of Hoechst stain (blue) and the cycle 8 nuclear mask (yellow). The final cycle is used to create the mask used in this analysis so that the same cells can be tracked through all t-CyCIF cycles despite ~15% overall cell loss by cycle 8. Thus, regions in the overlay that show up in blue correspond in most cases to cells that are lost in the course of t-CyCIF and not to failure to identify and segment cells correctly.

**Figure 9-figure supplement 1. Spatial analysis of PD-1 and PD-L1 expressing cells.** This figure is relevant to the t-CyCIF study on a clear cell cancer shown in Figure 9. To compare co-localization of PD-1 and PD-L1 in tumor vs stroma, we computed the probability that PD1+ and PDL1+ cells would co-occur within a radius of

~10um, normalizing for the difference in the total number of PD1+ and PDL1+ cells in the two tissue regions. We interpret the spatial density of PD1+ or PDL1+ cells at each point in space as proportional to the probability of their occurring there (see Figure 9E-F). The co-occurrence density at a point (Figure 9G) is therefore the product of the spatial densities for PD1+ or PDL1+ cells at that point. For simplicity, regions corresponding to tumor and stroma regions were defined by a diagonal line that separated the upper-right and lower-left regions of the tissue; this corresponded closely to  $\alpha$ -SMA-low (tumor) and  $\alpha$ -SMA-high (tumor) domains (left panel). We found an  $e^{(0.98)} = 2.7$  fold difference in the distributions of co-occurrence densities between the two regions, representing an effect size of 0.94 as measured by Hedge's  $g$ ; this represents a significant and potentially meaningful fold-change (right panel).

**Figure 10-figure supplement 1. (A-D)** Gallery of tissues imaged for the TMA shown described in Figure 10.

**Figure 12-figure supplement 1. Determination of cluster number for semi-supervised clustering using expectation-maximization Gaussian mixture (EMGM) modeling.** To determine an appropriate number of clusters ( $k$ ) for analysis of the GBM tumor shown in Figures 12 we determined negative log-likelihood-ratio for various values of  $k$ . Due to the large sample size, likelihood-ratio tests were not helpful in choosing  $k$ . Thus, for each choice of cluster number  $n$ , the likelihood-ratio was calculated for a Gaussian mixture model with  $n = k-1$  and with  $n = k$  and the ratio then plotted relative to  $k$ . The EMGM algorithm was initialized 30 times for each value of  $k$  and it converged in all instances. The inflection at  $k = 8$  (red arrow) suggested that inclusion of additional clusters ( $k > 8$ ) explains a smaller, distinct source of variation in the data. The plot is shown on a logarithmic scale to better visualize the range of the log-likelihood ratios, and should not be confused with the logarithm already applied to the likelihood ratios themselves.

**Figure 12-figure supplement 2. Spatial distribution of molecular phenotypes in a single GBM.** This analysis is directly analogous to the analysis shown in Figure 11, but uses 12 clusters for EMGM analysis rather than 8. **(A)** Intensity values from the tumor in Figure 10 were clustered using expected-maximization with

Gaussian mixtures (EMGM) with  $k = 12$ . The number of cells in each cluster is shown as a percentage of all cells in the tumor. **(B)** EMGM clusters (in color code) mapped back to singles cells and their positions in the tumor. The coordinate system is the same as in Figure 10. The positions of seven macroscopic regions (R1-R7) representing distinct lobes of the tumour are shown. **(C)** Magnified view of Frame 147 from region R5 with EMGM cluster assignment for each cell in the frame shown as a dot. **(D)** The proportional representation of EMGM clusters in each tumor region as defined in Panel B.

**Table 1. Microscopes used in this study and their properties**

| Instrument                 | Type                                     | Objective   | Field of View  | Nominal Resolution <sup>1</sup> |
|----------------------------|------------------------------------------|-------------|----------------|---------------------------------|
| RareCyte<br>Cytefinder     | Slide Scanner                            | 10X/0.3 NA  | 1.6 x 1.4 mm   | 1.06 $\mu\text{m}$              |
|                            |                                          | 20X/0.8NA   | 0.8 x 0.7 mm   | 0.40 $\mu\text{m}$              |
|                            |                                          | 40X/0.6 NA  | 0.42 x 0.35 mm | 0.53 $\mu\text{m}$              |
| GE INCell<br>Analyzer 6000 | Confocal                                 | 60X/0.95 NA | 0.22x0.22 mm   | 0.21 $\mu\text{m}$              |
| GE OMX Blaze               | Structured<br>Illumination<br>Microscope | 60X 1.42 NA | 0.08 x 0.08 mm | 0.11 $\mu\text{m}$              |

<sup>1</sup> Except in the case of the OMX Blaze, nominal resolution was calculated using the formula  $(r) = 0.61\lambda/\text{NA}$  for widefield and  $(r) = 0.4\lambda/\text{NA}$  for confocal microscopy with  $\lambda = 520\text{nm}$ . Actual resolution depends on optical properties and thickness of sample, alignment and quality of the optical components in the light path. For structured illumination microscopy, actual resolution depends on accurate matching of immersion oil refractive index with sample in the Cy3 channel and use of an optimal point spread function during reconstruction process. The resolution in other channels will be sub-nominal.

045

**Table 2. List of antibodies tested and validated for t-CyCIF.**

| Antibody Name     | Target Protein  | Validation | Vendor            | Catalog no.    | Clone      | Fluorophore     | Research Resource Identifier |
|-------------------|-----------------|------------|-------------------|----------------|------------|-----------------|------------------------------|
| Bax-488           | Bax             | ***        | BioLegend         | 633603         | 2D2        | Alexa Fluor 488 | AB_2562171                   |
| CD11b-488         | CD11b           | ***        | Abcam             | AB204271       | EPR1344    | Alexa Fluor 488 |                              |
| CD4-488           | CD4             | ***        | R&D Systems       | FAB8165G       | Polyclonal | Alexa Fluor 488 |                              |
| CD8a-488          | CD8             | ***        | eBioscience       | 53-0008-80     | AMC908     | Alexa Fluor 488 | AB_2574412                   |
| cJUN-488          | cJUN            | ***        | Abcam             | AB193780       | E254       | Alexa Fluor 488 |                              |
| CK18-488          | Cytokeratin 18  | ***        | eBioscience       | 53-9815-80     | LDK18      | Alexa Fluor 488 | AB_2574480                   |
| CK8-FITC          | Cytokeratin 8   | ***        | eBioscience       | 11-9938-80     | LP3K       | FITC            | AB_10548518                  |
| CycD1-488         | CycD1           | ***        | Abcam             | AB190194       | EPR2241    | Alexa Fluor 488 |                              |
| Ecad-488          | E-Cadherin      | ***        | CST               | 3199           | 24E10      | Alexa Fluor 488 | AB_10691457                  |
| EGFR-488          | EGFR            | ***        | CST               | 5616           | D38B1      | Alexa Fluor 488 | AB_10691853                  |
| EpCAM-488         | EpCAM           | ***        | CST               | 5198           | VU1D9      | Alexa Fluor 488 | AB_10692105                  |
| HES1-488          | HES1            | ***        | Abcam             | AB196328       | EPR4226    | Alexa Fluor 488 |                              |
| Ki67-488          | Ki67            | ***        | CST               | 11882          | D3B5       | Alexa Fluor 488 | AB_2687824                   |
| LaminA/C-488      | Lamin A/C       | ***        | CST               | 8617           | 4C11       | Alexa Fluor 488 | AB_10997529                  |
| LaminB1-488       | Lamin B1        | ***        | Abcam             | AB194106       | EPR8985(B) | Alexa Fluor 488 |                              |
| mCD3E-FITC        | ms_CD3E         | ***        | BioLegend         | 100306         | 145-2C11   | FITC            | AB_312671                    |
| mCD4-488          | ms_CD4          | ***        | BioLegend         | 100532         | RM4-5      | Alexa Fluor 488 | AB_493373                    |
| MET-488           | c-MET           | ***        | CST               | 8494           | D1C2       | Alexa Fluor 488 | AB_10999405                  |
| mF4/80-488        | ms_F4/80        | ***        | BioLegend         | 123120         | BM8        | Alexa Fluor 488 | AB_893479                    |
| MITF-488          | MITF            | ***        | Abcam             | AB201675       | D5         | Alexa Fluor 488 |                              |
| Ncad-488          | N-Cadherin      | ***        | BioLegend         | 350809         | 8C11       | Alexa Fluor 488 | AB_11218797                  |
| p53-488           | p53             | ***        | CST               | 5429           | 7F5        | Alexa Fluor 488 | AB_10695458                  |
| PCNA-488          | PCNA            | ***        | CST               | 8580           | PC10       | Alexa Fluor 488 | AB_11178664                  |
| PD1-488           | PD1             | ***        | CST               | 15131          | D3W4U      | Alexa Fluor 488 |                              |
| PDI-488           | PDI             | ***        | CST               | 5051           | C81H6      | Alexa Fluor 488 | AB_10950503                  |
| pERK-488          | pERK(T202/Y204) | ***        | CST               | 4344           | D13.14.4E  | Alexa Fluor 488 | AB_10695876                  |
| pNDG1-488         | pNDG1(T346)     | ***        | CST               | 6992           | D98G11     | Alexa Fluor 488 | AB_10827648                  |
| POL2A-488         | POL2A           | ***        | Novus Biologicals | NB200-598AF488 | 4H8        | Alexa Fluor 488 | AB_2167465                   |
| pS6(S240/244)-488 | pS6(240/244)    | ***        | CST               | 5018           | D68F8      | Alexa Fluor 488 | AB_10695861                  |
| S100a-488         | S100alpha       | ***        | Abcam             | AB207367       | EPR5251    | Alexa Fluor 488 |                              |
| SQSTM1-488        | SQSTM1/p62      | ***        | CST               | 8833           | D1D9E3     | Alexa Fluor 488 |                              |
| STAT3-488         | STAT3           | ***        | CST               | 14047          | B3Z2G      | Alexa Fluor 488 |                              |
| Survivin-488      | Survivin        | ***        | CST               | 2810           | 71G4B7     | Alexa Fluor 488 | AB_10691462                  |
| Catenin-488       | β-Catenin       | ***        | CST               | 2849           | L54E2      | Alexa Fluor 488 | AB_10693296                  |
| Actin-555         | Actin           | ***        | CST               | 8046           | 13E5       | Alexa Fluor 555 | AB_11179208                  |
| CD11c-570         | CD11c           | ***        | eBioscience       | 41-9761-80     | 118/A5     | eFluor 570      | AB_2573632                   |
| CD3D-555          | CD3D            | ***        | Abcam             | AB208514       | EP4426     | Alexa Fluor 555 |                              |
| CD4-570           | CD4             | ***        | eBioscience       | 41-2444-80     | N1UG0      | eFluor 570      | AB_2573601                   |
| CD45-PE           | CD45            | ***        | R&D Systems       | FAB1430P-100   | 2D1        | PE              | AB_2237898                   |
| CK7-555           | Cytokeratin 7   | ***        | Abcam             | AB209601       | EPR17078   | Alexa Fluor 555 |                              |
| cMYC-555          | cMYC            | ***        | Abcam             | AB201780       | Y69        | Alexa Fluor 555 |                              |
| E2F1-555          | E2F1            | ***        | Abcam             | AB208078       | EPR3818(3) | Alexa Fluor 555 |                              |

| Antibody Name           | Target Protein    | Validation | Vendor      | Catalog no. | Clone      | Fluorophore     | Research Resource Identifier |
|-------------------------|-------------------|------------|-------------|-------------|------------|-----------------|------------------------------|
| <b>Ecad-555</b>         | E-Cadherin        | ***        | CST         | 4295        | 24E10      | Alexa Fluor 555 |                              |
| <b>EpCAM-PE</b>         | EpCAM             | ***        | BioLegend   | 324205      | 9C4        | PE              | AB_756079                    |
| <b>FOXO1a-555</b>       | FOXO1a            | ***        | Abcam       | AB207244    | EP927Y     | Alexa Fluor 555 |                              |
| <b>FOXP3-570</b>        | FOXP3             | ***        | eBioscience | 41-4777-80  | 236A/E7    | eFluor 570      | AB_2573608                   |
| <b>GFAP-570</b>         | GFAP              | ***        | eBioscience | 41-9892-80  | GA5        | eFluor 570      | AB_2573655                   |
| <b>HSP90-PE</b>         | HSP90b            | ***        | Abcam       | AB115641    | Polyclonal | PE              | AB_10936222                  |
| <b>KAP1-594</b>         | KAP1              | ***        | BioLegend   | 619304      | 20A1       | Alexa Fluor 594 | AB_2563298                   |
| <b>Keratin-555</b>      | pan-Keratin       | ***        | CST         | 3478        | C11        | Alexa Fluor 555 | AB_10829040                  |
| <b>Keratin-570</b>      | pan-Keratin       | ***        | eBioscience | 41-9003-80  | AE1/AE3    | eFluor 570      | AB_11217482                  |
| <b>Ki67-570</b>         | Ki67              | ***        | eBioscience | 41-5699-80  | 20Raj1     | eFluor 570      | AB_11220088                  |
| <b>LC3-555</b>          | LC3               | ***        | CST         | 13173       | D3U4C      | Alexa Fluor 555 |                              |
| <b>MAP2-570</b>         | MAP2              | ***        | eBioscience | 41-9763-80  | AP20       | eFluor 570      | AB_2573634                   |
| <b>pAUR-555</b>         | pAUR1/2/3(T288/T2 | ***        | CST         | 13464       | D13A11     | Alexa Fluor 555 |                              |
| <b>pCHK2-PE</b>         | pChk2(T68)        | ***        | CST         | 12812       | C13C1      | PE              |                              |
| <b>PDL1-555</b>         | PD-L1/CD274       | ***        | Abcam       | AB213358    | 28-8       | Alexa Fluor 555 |                              |
| <b>pH3-555</b>          | pH3(S10)          | ***        | CST         | 3475        | D2C8       | Alexa Fluor 555 | AB_10694639                  |
| <b>pRB-555</b>          | pRB(S807/811)     | ***        | CST         | 8957        | D20B12     | Alexa Fluor 555 |                              |
| <b>pS6(235/236)-555</b> | pS6(235/236)      | ***        | CST         | 3985        | D57.2.2E   | Alexa Fluor 555 | AB_10693792                  |
| <b>pSRC-PE</b>          | pSRC(Y418)        | ***        | eBioscience | 12-9034-41  | SC1T2M3    | PE              | AB_2572680                   |
| <b>S6-555</b>           | S6                | ***        | CST         | 6989        | 54D2       | Alexa Fluor 555 | AB_10828226                  |
| <b>SQSTM1-555</b>       | SQSTM1/p62        | ***        | Abcam       | AB203430    | EPR4844    | Alexa Fluor 555 |                              |
| <b>VEGFR2-555</b>       | VEGFR2            | ***        | CST         | 12872       | D5B1       | Alexa Fluor 555 |                              |
| <b>VEGFR2-PE</b>        | VEGFR2            | ***        | CST         | 12634       | D5B1       | PE              |                              |
| <b>Vimentin-555</b>     | Vimentin          | ***        | CST         | 9855        | D21H3      | Alexa Fluor 555 | AB_10859896                  |
| <b>Vinculin-570</b>     | Vinculin          | ***        | eBioscience | 41-9777-80  | 7F9        | eFluor 570      | AB_2573646                   |
| <b>gH2ax-PE</b>         | gH2ax             | ***        | BioLegend   | 613412      | 2F3        | PE              | AB_2616871                   |
| <b>AKT-647</b>          | AKT               | ***        | CST         | 5186        | C67E7      | Alexa Fluor 647 | AB_10695877                  |
| <b>aSMA-660</b>         | aSMA              | ***        | eBioscience | 50-9760-80  | 1A4        | eFluor 660      | AB_2574361                   |
| <b>B220-647</b>         | CD45R/B220        | ***        | BioLegend   | 103226      | RA3-6B2    | Alexa Fluor 647 | AB_389330                    |
| <b>Bcl2-647</b>         | Bcl2              | ***        | BioLegend   | 658705      | 100        | Alexa Fluor 647 | AB_2563279                   |
| <b>Catenin-647</b>      | Beta-Catenin      | ***        | CST         | 4627        | L54E2      | Alexa Fluor 647 | AB_10691326                  |
| <b>CD20-660</b>         | CD20              | ***        | eBioscience | 50-0202-80  | L26        | eFluor 660      | AB_11151691                  |
| <b>CD45-647</b>         | CD45              | ***        | BioLegend   | 304020      | HI30       | Alexa Fluor 647 | AB_493034                    |
| <b>CD8a-660</b>         | CD8               | ***        | eBioscience | 50-0008-80  | AMC908     | eFluor 660      | AB_2574148                   |
| <b>CK5-647</b>          | Cytokeratin 5     | ***        | Abcam       | AB193895    | EP1601Y    | Alexa Fluor 647 |                              |
| <b>ColIV-647</b>        | Collagen IV       | ***        | eBioscience | 51-9871-80  | 1042       | Alexa Fluor 647 | AB_10854267                  |
| <b>COXIV-647</b>        | COXIV             | ***        | CST         | 7561        | 3E11       | Alexa Fluor 647 | AB_10994876                  |
| <b>cPARP-647</b>        | cPARP             | ***        | CST         | 6987        | D64E10     | Alexa Fluor 647 | AB_10858215                  |

| Antibody Name | Target Protein | Validation | Vendor       | Catalog no. | Clone      | Fluorophore     | Research Resource Identifier |
|---------------|----------------|------------|--------------|-------------|------------|-----------------|------------------------------|
| FOXA2-660     | FOXA2          | ***        | eBioscience  | 50-4778-82  | 3C10       | eFluor 660      | AB_2574221                   |
| FOXP3-647     | FOXP3          | ***        | BioLegend    | 320113      | 206D       | Alexa Fluor 647 | AB_439753                    |
| gH2ax-647     | H2ax(S139)     | ***        | CST          | 9720        | 20E3       | Alexa Fluor 647 | AB_10692910                  |
| gH2ax-647     | H2ax(S139)     | ***        | BioLegend    | 613407      | 2F3        | Alexa Fluor 647 | AB_2114994                   |
| HES1-647      | HES1           | ***        | Abcam        | AB196577    | EPR4226    | Alexa Fluor 647 |                              |
| Ki67-647      | Ki67           | ***        | CST          | 12075       | D3B5       | Alexa Fluor 647 |                              |
| Ki67-647      | Ki67           | ***        | BioLegend    | 350509      | Ki-67      | Alexa Fluor 647 | AB_10900810                  |
| mCD45-647     | ms_CD45        | ***        | BioLegend    | 103124      | 30-F11     | Alexa Fluor 647 | AB_493533                    |
| mCD4-647      | ms_CD4         | ***        | BioLegend    | 100426      | GK1.5      | Alexa Fluor 647 | AB_493519                    |
| mEPCAM-647    | ms_EPCAM       | ***        | BioLegend    | 118211      | G8.8       | Alexa Fluor 647 | AB_1134104                   |
| MHCI-647      | MHCI/HLAA      | ***        | Abcam        | AB199837    | EP1395Y    | Alexa Fluor 647 |                              |
| MHCII-647     | MHCII          | ***        | Abcam        | AB201347    | EPR11226   | Alexa Fluor 647 |                              |
| mLy6C-647     | ms_Ly6C        | ***        | BioLegend    | 128009      | HK1.4      | Alexa Fluor 647 | AB_1236551                   |
| mTOR-647      | mTOR           | ***        | CST          | 5048        | 7C10       | Alexa Fluor 647 | AB_10828101                  |
| NFkB-647      | NFkB (p65)     | ***        | Abcam        | AB190589    | E379       | Alexa Fluor 647 |                              |
| NGFR-647      | NGFR/CD271     | ***        | Abcam        | AB195180    | EP1039Y    | Alexa Fluor 647 |                              |
| NUP98-647     | NUP98          | ***        | CST          | 13393       | C39A3      | Alexa Fluor 647 |                              |
| p21-647       | p21            | ***        | CST          | 8587        | 12D1       | Alexa Fluor 647 | AB_10892861                  |
| p27-647       | p27            | ***        | Abcam        | AB194234    | Y236       | Alexa Fluor 647 |                              |
| pATM-660      | pATM(S1981)    | ***        | eBioscience  | 50-9046-41  | 10H11.E12  | eFluor 660      | AB_2574312                   |
| PAX8-647      | PAX8           | ***        | Abcam        | AB215953    | EPR18715   | Alexa Fluor 647 |                              |
| PDL1-647      | PD-L1/CD274    | ***        | CST          | 15005       | E1L3N      | Alexa Fluor 647 |                              |
| pMK2-647      | pMK2(T334)     | ***        | CST          | 4320        | 27B7       | Alexa Fluor 647 | AB_10695401                  |
| pmTOR-660     | pmTOR(S2448)   | ***        | eBioscience  | 50-9718-41  | MRRBY      | eFluor 660      | AB_2574351                   |
| pS6_235-647   | pS6(S235/S236) | ***        | CST          | 4851        | D57.2.2E   | Alexa Fluor 647 | AB_10695457                  |
| pSTAT3-647    | pSTAT3(Y705)   | ***        | CST          | 4324        | D3A7       | Alexa Fluor 647 | AB_10694637                  |
| pTyr-647      | p-Tyrosine     | ***        | CST          | 9415        | p-Tyr-100  | Alexa Fluor 647 | AB_10693160                  |
| S100A4-647    | S100A4         | ***        | Abcam        | AB196168    | EPR2761(2) | Alexa Fluor 647 |                              |
| Survivin-647  | Survivin       | ***        | CST          | 2866        | 71G4B7     | Alexa Fluor 647 | AB_10698609                  |
| TUBB3-647     | TUBB3          | ***        | BioLegend    | 657405      | AA10       | Alexa Fluor 647 | AB_2563609                   |
| Tubulin-647   | beta-Tubulin   | ***        | CST          | 3624        | 9F3        | Alexa Fluor 647 | AB_10694204                  |
| Vimentin-647  | Vimentin       | ***        | BioLegend    | 677807      | O91D3      | Alexa Fluor 647 | AB_2616801                   |
| anti-14-3-3   | 14-3-3         | ***        | Santa Cruz   | SC-629-G    | Polyclonal | N/D             | AB_630820                    |
| anti-53BP1    | 53BP1          | ***        | Bethyl       | A303-906A   | Polyclonal | N/D             | AB_2620256                   |
| anti-5HMC     | 5HMC           | ***        | Active Motif | 39769       | Polyclonal | N/D             | AB_10013602                  |
| anti-CD11b    | CD11b          | ***        | Abcam        | AB133357    | EPR1344    | N/D             | AB_2650514                   |
| anti-CD2      | CD2            | ***        | Abcam        | AB37212     | Polyclonal | N/D             | AB_726228                    |
| anti-CD20     | CD20           | ***        | Dako         | M0755       | L26        | N/D             | AB_2282030                   |
| anti-CD3      | CD3            | ***        | Dako         | A0452       | Polyclonal | N/D             | AB_2335677                   |
| anti-CD4      | CD4            | ***        | Dako         | M7310       | 4B12       | N/D             |                              |
| anti-CD45RO   | CD45RO         | ***        | Dako         | M0742       | UCHL1      | N/D             | AB_2237910                   |
| anti-CD8      | CD8            | ***        | Dako         | M7103       | C8/144B    | N/D             | AB_2075537                   |

| Antibody Name | Target Protein      | Validation | Vendor      | Catalog no. | Clone      | Fluorophore     | Research Resource Identifier |
|---------------|---------------------|------------|-------------|-------------|------------|-----------------|------------------------------|
| anti-CycA2    | CycA2               | ***        | Abcam       | AB38        | E23.1      | N/D             | AB_304084                    |
| anti-ET1      | ET-1                | ***        | Abcam       | AB2786      | TR.ET.48.5 | N/D             | AB_303299                    |
| anti-FAP      | FAP                 | ***        | eBioscience | BMS168      | F11-24     | N/D             | AB_10597443                  |
| anti-FOXP3    | FOXP3               | ***        | BioLegend   | 320102      | 206D       | N/D             | AB_430881                    |
| anti-LAMP2    | LAMP2               | ***        | Abcam       | AB25631     | H4B4       | N/D             | AB_470709                    |
| anti-MCM6     | MCM6                | ***        | Santa Cruz  | SC-9843     | Polyclonal | N/D             | AB_2142543                   |
| anti-PAX8     | PAX8                | ***        | Abcam       | AB191870    | EPR18715   | N/D             |                              |
| anti-PD1      | PD1                 | ***        | CST         | 86163       | D4W2J      | N/D             |                              |
| anti-pEGFR    | pEGFR(Y1068)        | ***        | CST         | 3777        | D7A5       | N/D             | AB_2096270                   |
| anti-pERK     | pERK(T202/Y204)     | ***        | CST         | 4370        | D13.14.4E  | N/D             | AB_2315112                   |
| anti-pRB      | pRB(S807/811)       | ***        | Santa Cruz  | SC-16670    | Polyclonal | N/D             | AB_655250                    |
| anti-pRPA32   | pRPA32 (S4/S8)      | ***        | Bethyl      | IHC-00422   | Polyclonal | N/D             | AB_1659840                   |
| anti-pSTAT3   | pSTAT3              | ***        | CST         | 9145        | D3A7       | N/D             | AB_2491009                   |
| anti-pTyr     | pTyr                | ***        | CST         | 9411        | p-Tyr-100  | N/D             | AB_331228                    |
| anti-RPA32    | RPA32               | ***        | Bethyl      | IHC-00417   | Polyclonal | N/D             | AB_1659838                   |
| anti-TPCN2    | TPCN2               | ***        | NOVUSBIO    | NBP1-86923  | Polyclonal | N/D             | AB_11021735                  |
| anti-VEGFR1   | VEGFR1/FLT1         | ***        | Santa Cruz  | SC-31173    | Polyclonal | N/D             | AB_2106885                   |
| Abeta-488     | Beta-Amyloid (1-16) | **         | BioLegend   | 803013      | 6E10       | Alexa Fluor 488 | AB_2564765                   |
| BRAF-FITC     | B-Raf               | **         | Abcam       | ab175637    | K21-F      | FITC            |                              |
| BrdU-488      | BrdU                | **         | BioLegend   | 364105      | 3D4        | Alexa Fluor 488 | AB_2564499                   |
| cCasp3-488    | cCasp3              | **         | R&D Systems | IC835G-025  | 269518     | Alexa Fluor 488 |                              |
| CD11b-488     | CD11b               | **         | BioLegend   | 101219      | M1/70      | Alexa Fluor 488 | AB_493545                    |
| CD123-488     | CD123               | **         | BioLegend   | 306035      | 6H6        | Alexa Fluor 488 | AB_2629569                   |
| CD49b-FITC    | CD49b               | **         | BioLegend   | 359305      | P1E6-C5    | FITC            | AB_2562530                   |
| CD69-FITC     | CD69                | **         | BioLegend   | 310904      | FN50       | FITC            | AB_314839                    |
| CD71-FITC     | CD71                | **         | BioLegend   | 334103      | CY1G4      | FITC            | AB_1236432                   |
| CD80-FITC     | CD80                | **         | R&D Systems | FAB140F     | 37711      | FITC            | AB_357027                    |
| CD8a-488      | CD8a                | **         | eBioscience | 53-0086-41  | OKT8       | Alexa Fluor 488 | AB_10547060                  |
| CDC2-FITC     | CDC2/p34            | **         | Santa Cruz  | SC-54 FITC  | 17         | FITC            | AB_627224                    |
| CycB1-FITC    | CycB1               | **         | Santa Cruz  | SC-752 FITC | Polyclonal | FITC            | AB_2072134                   |
| FN-488        | Fibronectin         | **         | Abcam       | AB198933    | F1         | Alexa Fluor 488 |                              |
| IFNG-488      | Interferon-Gamma    | **         | BioLegend   | 502517      | 4S.B3      | Alexa Fluor 488 | AB_493030                    |
| IL1-FITC      | IL1                 | **         | BioLegend   | 511705      | H1b-98     | FITC            | AB_1236434                   |
| IL6-FITC      | IL6                 | **         | BioLegend   | 501103      | MQ2-13A5   | FITC            | AB_315151                    |
| mCD31-FITC    | ms_CD31             | **         | eBioscience | 11-0311-82  | 390        | FITC            | AB_465012                    |
| mCD8a-488     | ms_CD8a             | **         | BioLegend   | 100726      | 53-6.7     | Alexa Fluor 488 | AB_493423                    |
| Nestin-488    | Nestin              | **         | eBioscience | 53-9843-80  | 10C2       | Alexa Fluor 488 | AB_1834347                   |
| NeuN-488      | NeuN                | **         | Millipore   | MAB377X     | A60        | Alexa Fluor 488 | AB_2149209                   |
| PR-488        | PR/PGR              | **         | Abcam       | AB199224    | YR85       | Alexa Fluor 488 |                              |
| Snail1-488    | Snail1              | **         | eBioscience | 53-9859-80  | 20C8       | Alexa Fluor 488 | AB_2574482                   |
| TGFB-FITC     | TGFB1               | **         | BioLegend   | 349605      | TW4-2F8    | FITC            | AB_10679043                  |
| TNFa-488      | TNFa                | **         | BioLegend   | 502917      | MAb11      | Alexa Fluor 488 | AB_493122                    |
| AR-555        | AR                  | **         | CST         | 8956        | D6F11      | Alexa Fluor 555 | AB_11129223                  |
| CD11a-PE      | CD11a               | **         | BioLegend   | 301207      | HI111      | PE              | AB_314145                    |
| CD11b-555     | CD11b               | **         | Abcam       | AB206616    | EPR1344    | Alexa Fluor 555 |                              |
| CD131-PE      | CD131               | **         | BD          | 559920      | JORO50     | PE              | AB_397374                    |

| Antibody Name     | Target Protein    | Validation | Vendor      | Catalog no.  | Clone       | Fluorophore     | Research Resource Identifier |
|-------------------|-------------------|------------|-------------|--------------|-------------|-----------------|------------------------------|
| CD14-PE           | CD14              | **         | eBioscience | 12-0149      | 61D3        | PE              | AB_10597598                  |
| CD1a-PE           | CD1a              | **         | BioLegend   | 300105       | HI149       | PE              | AB_314019                    |
| CD1c-PE           | CD1c              | **         | BioLegend   | 331505       | L161        | PE              | AB_1089000                   |
| CD20-PE           | CD20              | **         | BioLegend   | 302305       | 2H7         | PE              | AB_314253                    |
| CD23-PE           | CD23              | **         | eBioscience | 12-0232-81   | B3B4        | PE              | AB_465592                    |
| CD31-PE           | CD31              | **         | eBioscience | 12-0319-41   | WM-59       | PE              | AB_10670623                  |
| CD31-PE           | CD31              | **         | R&D Systems | FAB3567P-025 | 9G11        | PE              | AB_2279388                   |
| CD34-PE           | CD34              | **         | Abcam       | AB30377      | QBEND/10    | PE              | AB_726407                    |
| CD45R-e570        | CD45R/B220        | **         | eBioscience | 41-0452-80   | RA3-6B2     | eFluor 570      | AB_2573598                   |
| CD71-PE           | CD71              | **         | eBioscience | 12-0711-81   | R17217      | PE              | AB_465739                    |
| CD86-PE           | CD86              | **         | BioLegend   | 305405       | IT2.2       | PE              | AB_314525                    |
| CK19-570          | Cytokeratin 19    | **         | eBioscience | 41-9898-80   | BA17        | eFluor 570      | AB_11218678                  |
| HER2-570          | HER2              | **         | eBioscience | 41-9757-80   | MJD2        | eFluor 570      | AB_2573628                   |
| IL3-PE            | IL3               | **         | BD          | 554383       | MP2-8F8     | PE              | AB_395358                    |
| NFATc1-PE         | NFATc1            | **         | BioLegend   | 649605       | 7A6         | PE              | AB_2562546                   |
| PDL1-PE           | PD-L1/CD274       | **         | BioLegend   | 329705       | 29E.2A3     | PE              | AB_940366                    |
| pMAPK (T202/Y204) | pERK1/2(T202/Y20) | **         | CST         | 14095        | 197G2       | PE              |                              |
| pMAPK (Y204/Y187) | pERK1/2(Y204/Y18) | **         | CST         | 75165        | D1H6G       | PE              |                              |
| pSTAT1-PE         | pSTAT1(Y705)      | **         | BioLegend   | 686403       | A15158B     | PE              | AB_2616938                   |
| ABCC1-647         | ABCC1             | **         | BioLegend   | 370203       | QCRL-2      | Alexa Fluor 647 | AB_2566664                   |
| AnnexinV-674      | N/D               | **         | BioLegend   | 640911       | NA          | Alexa Fluor 647 | AB_2561293                   |
| CD103-647         | CD103             | **         | BioLegend   | 350209       | Ber-ACT8    | Alexa Fluor 647 | AB_10640870                  |
| CD25-647          | CD25              | **         | BioLegend   | 302617       | BC96        | Alexa Fluor 647 | AB_493046                    |
| CD31-APC          | CD31              | **         | eBioscience | 17-0319-41   | WM-59       | APC             | AB_10853188                  |
| CD68-APC          | CD68              | **         | BioLegend   | 333809       | Y1/82A      | APC             | AB_10567107                  |
| CD8a-647          | CD8a              | **         | BioLegend   | 344725       | SK1         | Alexa Fluor 647 | AB_2563451                   |
| CD8a-647          | CD8a              | **         | R&D Systems | FAB1509R-025 | 37006       | Alexa Fluor 647 |                              |
| CycE-660          | CycE              | **         | eBioscience | 50-9714-80   | HE12        | eFluor 660      | AB_2574350                   |
| HIF1-647          | HIF1              | **         | BioLegend   | 359705       | 546-16      | Alexa Fluor 647 | AB_2563331                   |
| HP1-647           | HP1               | **         | Abcam       | AB198391     | EPR5777     | Alexa Fluor 647 |                              |
| mCD123-APC        | ms_CD123          | **         | eBioscience | 17-1231-81   | 5B11        | APC             | AB_891363                    |
| NGFR-647          | NGFR/CD271        | **         | BD          | 560326       | C40-1457    | Alexa Fluor 647 | AB_1645403                   |
| pBTK-660          | pBTK(Y551/Y511)   | **         | eBioscience | 50-9015-80   | M4G3LN      | eFluor 660      | AB_2574306                   |
| PD1-647           | PD1               | **         | Abcam       | AB201825     | EPR4877 (2) | Alexa Fluor 647 |                              |
| PR-660            | PR/PGR            | **         | eBioscience | 50-9764-80   | KMC912      | eFluor 660      | AB_2574363                   |
| RUNX3-660         | RUNX3             | **         | eBioscience | 50-9817-80   | R3-5G4      | eFluor 660      | AB_2574383                   |
| SOX2-647          | SOX2              | **         | Abcam       | AB192075     | Polyclonal  | Alexa Fluor 647 |                              |
| anti-53BP1        | 53BP1             | **         | Millipore   | MAB3802      | BP13        | N/D             | AB_2206767                   |
| anti-Axl          | Axl               | **         | R&D         | AF154        | Polyclonal  | N/D             | AB_354852                    |
| anti-CD11b        | CD11b             | **         | Abcam       | AB52478      | EP1345Y     | N/D             | AB_868788                    |

| Antibody Name | Target Protein  | Validation | Vendor            | Catalog no.      | Clone                | Fluorophore     | Research Resource Identifier |
|---------------|-----------------|------------|-------------------|------------------|----------------------|-----------------|------------------------------|
| anti-CD8a     | CD8             | **         | eBioscience       | 14-0085-80       | C8/144B              | N/D             | AB_11151339                  |
| anti-CEP170   | CEP170          | **         | Abcam             | AB72505          | Polyclonal           | N/D             | AB_1268101                   |
| anti-cMYC     | cMYC            | **         | BioLegend         | 626801           | 9E10                 | N/D             | AB_2235686                   |
| anti-CPS1     | CPS1            | **         | Abcam             | AB129076         | EPR7493-3            | N/D             | AB_11156290                  |
| anti-E2F1     | E2F1            | **         | ThermoFisher      | MS-879-P1        | KH95                 | N/D             | AB_143934                    |
| anti-eEF2K    | eEF2K           | **         | Santa Cruz        | SC-21642         | K-19                 | N/D             | AB_640043                    |
| anti-Emil1    | Emil1           | **         | Abcam             | AB212397         | EMIL/1176            | N/D             |                              |
| anti-FKHRL1   | FKHRL1          | **         | Santa Cruz        | SC-9812          | Polyclonal           | N/D             | AB_640608                    |
| anti-FLAG     | FLAG            | **         | Sigma             | F1804            | M2                   | N/D             | AB_262044                    |
| anti-GranB    | Granzyme_B      | **         | Dako              | M7235            | M7235                | N/D             | AB_2114697                   |
| anti-HMB45    | HMB45           | **         | Abcam             | AB732            | HMB45+M2-7C10+M2-9E3 | N/D             | AB_305844                    |
| anti-HSP90b   | HSP90b          | **         | Santa Cruz        | SC-1057          | D-19                 | N/D             | AB_2121392                   |
| anti-IL2Ra    | IL2Ra           | **         | Abcam             | AB128955         | EPR6452              | N/D             | AB_11141054                  |
| anti-LAMP2    | LAMP2           | **         | R&D               | AF6228           | Polyclonal           | N/D             | AB_10971818                  |
| anti-MITF     | MITF            | **         | Abcam             | AB12039          | C5                   | N/D             | AB_298801                    |
| anti-Ncad     | N-Cadherin      | **         | Abcam             | AB18203          | Polyclonal           | N/D             | AB_444317                    |
| anti-NCAM     | NCAM            | **         | Abcam             | AB6123           | ERIC-1               | N/D             | AB_2149537                   |
| anti-NF1      | NF1             | **         | Abcam             | AB178323         | McNFn27b             | N/D             |                              |
| anti-pCTD     | Pol II CTD(S2)  | **         | Active Motif      | 61083            | 3E10                 | N/D             | AB_2687450                   |
| anti-PD1      | PD1             | **         | CST               | 43248            | EH33                 | N/D             |                              |
| anti-pTuberin | pTuberin(S664)  | **         | Abcam             | AB133465         | EPR8202              | N/D             | AB_11157389                  |
| anti-S100     | S100            | **         | Dako              | Z0311            | Polyclonal           | N/D             | AB_10013383                  |
| anti-SIRT3    | SIRT3           | **         | CST               | 2627             | C73E3                | N/D             | AB_2188622                   |
| anti-TIA1     | TIA1            | **         | Santa Cruz        | SC-1751          | Polyclonal           | N/D             | AB_2201433                   |
| anti-TLR3     | TLR3            | **         | Santa Cruz        | SC-8691          | Polyclonal           | N/D             | AB_2240700                   |
| anti-TNFa     | TNFa            | **         | Abcam             | AB11564          | MP6-XT3              | N/D             | AB_298170                    |
| anti-TPCN2    | TPCN2           | **         | Abcam             | AB119915         | Polyclonal           | N/D             | AB_10903692                  |
| CD11a-FITC    | CD11a           | *          | eBioscience       | 11-0119-41       | HI111                | FITC            | AB_10597888                  |
| CD20-FITC     | CD20            | *          | BioLegend         | 302303           | 2H7                  | FITC            | AB_314251                    |
| CD2-FITC      | CD2             | *          | BioLegend         | 300206           | RPA-2.10             | FITC            | AB_314030                    |
| CD45RO-488    | CD45RO          | *          | BioLegend         | 304212           | UCHL1                | Alexa Fluor 488 | AB_528823                    |
| CD8a-488      | CD8             | *          | BioLegend         | 301024           | RPA-T8               | Alexa Fluor 488 | AB_2561282                   |
| cJUN-FITC     | cJUN            | *          | Santa Cruz        | SC-1694 FITC     | Polyclonal           | FITC            | AB_631263                    |
| CXCR5-FITC    | CXCR5           | *          | BioLegend         | 356913           | J252D4               | FITC            | AB_2561895                   |
| Ecad-FITC     | Ecad            | *          | BioLegend         | 324103           | 67A4                 | FITC            | AB_756065                    |
| FOXP3-488     | FOXP3           | *          | BioLegend         | 320011           | 150D                 | Alexa Fluor 488 | AB_439747                    |
| MITF-488      | MITF            | *          | Novus Biologicals | NB100-56561AF488 | 21D1418              | Alexa Fluor 488 | AB_838580                    |
| NCAM-488      | NCAM/CD56       | *          | Abcam             | AB200333         | EPR2566              | Alexa Fluor 488 |                              |
| NCAM-FITC     | NCAM/CD56       | *          | ThermoFisher      | 11-0566-41       | TULY56               | FITC            | AB_2572458                   |
| NGFR-FITC     | NGFR/CD271      | *          | BioLegend         | 345103           | ME20.4               | FITC            | AB_1937226                   |
| PD1-488       | PD-1            | *          | BioLegend         | 367407           | NAT105               | Alexa Fluor 488 | AB_2566677                   |
| PD1-488       | PD-1            | *          | BioLegend         | 329935           | EH12.2H7             | Alexa Fluor 488 | AB_2563593                   |
| pERK-488      | pERK(T202/Y204) | *          | CST               | 4374             | E10                  | Alexa Fluor 488 | AB_10705598                  |
| pERK-488      | pERK(T202/Y204) | *          | CST               | 4780             | 137F5                | Alexa Fluor 488 | AB_10705598                  |
| S100A4-FITC   | S100A4          | *          | BioLegend         | 370007           | NJ-4F3-D1            | FITC            | AB_2572073                   |
| SOX2-488      | SOX2            | *          | BioLegend         | 656109           | 14A6A34              | Alexa Fluor 488 | AB_2563956                   |
| CD133-PE      | CD133           | *          | eBioscience       | 12-1338-41       | TMP4                 | PE              | AB_1582258                   |
| cMyc-TRITC    | cMYC            | *          | Santa Cruz        | SC-40 TRITC      | 9E10                 | TRITC           | AB_627268                    |
| cPARP-555     | cPARP           | *          | CST               | 6894             | D64E10               | Alexa Fluor 555 | AB_10830735                  |
| CTLA4-PE      | CTLA4           | *          | BioLegend         | 369603           | BNI3                 | PE              | AB_2566796                   |

| Antibody Name                                                                                                                                                                                                      | Target Protein   | Validation | Vendor       | Catalog no. | Clone      | Fluorophore     | Research Resource Identifier |
|--------------------------------------------------------------------------------------------------------------------------------------------------------------------------------------------------------------------|------------------|------------|--------------|-------------|------------|-----------------|------------------------------|
| GATA3-594                                                                                                                                                                                                          | GATA3            | *          | BioLegend    | 653816      | 16E10A23   | Alexa Fluor 594 | AB_2563353                   |
| GFAP-Cy3                                                                                                                                                                                                           | GFAP             | *          | Millipore    | MAB3402C3   | NA         | Cy3             | AB_11213580                  |
| Oct4-555                                                                                                                                                                                                           | OCT_4            | *          | CST          | 4439        | C30A3      | Alexa Fluor 555 | AB_10922586                  |
| p21-555                                                                                                                                                                                                            | p21              | *          | CST          | 8493        | 12D1       | Alexa Fluor 555 | AB_10860074                  |
| PD1-PE                                                                                                                                                                                                             | PD1              | *          | BioLegend    | 329905      | EH12.2H7   | PE              | AB_940481                    |
| PDGFRb-555                                                                                                                                                                                                         | PDGFRb           | *          | Abcam        | AB206874    | Y92        | Alexa Fluor 555 |                              |
| pSTAT1-555                                                                                                                                                                                                         | pSTAT1           | *          | CST          | 8183        | 58D6       | Alexa Fluor 555 | AB_10860600                  |
| TIM1-PE                                                                                                                                                                                                            | TIM1             | *          | BioLegend    | 353903      | 1D12       | PE              | AB_11125165                  |
| cCasp3-647                                                                                                                                                                                                         | cCasp3           | *          | CST          | 9602        | D3E9       | Alexa Fluor 647 | AB_2687881                   |
| CD103-APC                                                                                                                                                                                                          | CD103            | *          | eBioscience  | 17-1038-41  | B-Ly7      | APC             | AB_10669816                  |
| CD3-647                                                                                                                                                                                                            | CD3              | *          | BioLegend    | 300422      | UCHT1      | Alexa Fluor 647 | AB_493092                    |
| CD3-660                                                                                                                                                                                                            | CD3              | *          | eBioscience  | 50-0037-41  | OKT3       | eFluor 660      | AB_2574150                   |
| CD3-APC                                                                                                                                                                                                            | CD3              | *          | eBioscience  | 17-0038-41  | UCHT1      | APC             | AB_10804761                  |
| CD45RO-APC                                                                                                                                                                                                         | CD45RO           | *          | BioLegend    | 304210      | UCHL1      | APC             | AB_314426                    |
| ER-647                                                                                                                                                                                                             | ER               | *          | Abcam        | AB205851    | EPR4097    | Alexa Fluor 647 |                              |
| FOXO3a-647                                                                                                                                                                                                         | FOXO3a           | *          | Abcam        | AB196539    | EP1949Y    | Alexa Fluor 647 |                              |
| GZMA-e660                                                                                                                                                                                                          | granzyme A       | *          | ThermoFisher | 50-9177-41  | CB9        | eFluor 660      | AB_2574330                   |
| GZMB-647                                                                                                                                                                                                           | Granzyme B       | *          | BioLegend    | 515405      | GB11       | Alexa Fluor 647 | AB_2294995                   |
| GZMB-APC                                                                                                                                                                                                           | Granzyme B       | *          | R&D Systems  | IC29051A    | 356412     | APC             | AB_894691                    |
| HER2-647                                                                                                                                                                                                           | HER2             | *          | BioLegend    | 324412      | 24D2       | Alexa Fluor 647 | AB_2262300                   |
| mCD49b-647                                                                                                                                                                                                         | ms_CD49b         | *          | BioLegend    | 103511      | HMa2       | Alexa Fluor 647 | AB_528830                    |
| NCAM-647                                                                                                                                                                                                           | NCAM/CD56        | *          | BioLegend    | 362513      | 5.1H11     | Alexa Fluor 647 | AB_2564086                   |
| NCAM-e660                                                                                                                                                                                                          | NCAM/CD56        | *          | ThermoFisher | 50-0565-80  | 5tukon56   | eFluor 660      | AB_2574160                   |
| pAKT-647                                                                                                                                                                                                           | pAKT             | *          | CST          | 4075        | D9E        | Alexa Fluor 647 | AB_10691856                  |
| pERK-647                                                                                                                                                                                                           | pERK (T202/Y204) | *          | CST          | 4375        | E10        | Alexa Fluor 647 | AB_10706777                  |
| pERK-647                                                                                                                                                                                                           | pERK (T202/Y204) | *          | BioLegend    | 369503      | 6B8B69     | Alexa Fluor 647 | AB_2571895                   |
| pIKBa-660                                                                                                                                                                                                          | pIKBa            | *          | eBioscience  | 50-9035-41  | RILYB3R    | eFluor 660      | AB_2574310                   |
| YAP-647                                                                                                                                                                                                            | YAP              | *          | CST          | 38707S      | D8H1X      | Alexa Fluor 647 |                              |
| anit-FANCD2                                                                                                                                                                                                        | FANCD2           | *          | Bethyl       | IHC-00624   | Polyclonal | N/D             | AB_10752755                  |
| anit-pcJUN                                                                                                                                                                                                         | p-cJUN           | *          | Santa Cruz   | SC-822      | KM-1       | N/D             | AB_627262                    |
| anti-AXL                                                                                                                                                                                                           | AXL              | *          | CST          | 8661        | C89E7      | N/D             | AB_11217435                  |
| anti-CXCR5                                                                                                                                                                                                         | CXCR5            | *          | GeneTex      | GTX100351   | Polyclonal | N/D             | AB_1240668                   |
| anti-CXCR5                                                                                                                                                                                                         | CXCR5            | *          | R&D          | MAB-190-SP  | 51505      | N/D             | AB_2292654                   |
| anti-FOXO3a                                                                                                                                                                                                        | FOXO3a           | *          | CST          | 2497        | 75D8       | N/D             | AB_836876                    |
| anti-GZMB                                                                                                                                                                                                          | Granzyme B       | *          | Abcam        | AB4059      | Polyclonal | N/D             | AB_304251                    |
| anti-PD1                                                                                                                                                                                                           | PD-1             | *          | Abcam        | AB63477     | Polyclonal | N/D             | AB_2159165                   |
| anti-PD1                                                                                                                                                                                                           | PD-1             | *          | ThermoFisher | 14-9985-81  | J43        | N/D             | AB_468663                    |
| anti-PD1                                                                                                                                                                                                           | PD-1             | *          | R&D          | AF1021      | Polyclonal | N/D             | AB_354541                    |
| anti-RFP                                                                                                                                                                                                           | RFP              | *          | ThermoFisher | R10367      | Polyclonal | N/D             | AB_2315269                   |
| CD11C-BV570                                                                                                                                                                                                        | CD11C            | *          | BioLegend    | 117331      | N418       | BV570           | AB_10900261                  |
| CD45-BV785                                                                                                                                                                                                         | CD45             | *          | BioLegend    | 304047      | HI30       | BV785           | AB_2563128                   |
| LY6G-BV570                                                                                                                                                                                                         | LY6G             | *          | BioLegend    | 127629      | 1A8        | BV570           | AB_10899738                  |
| <p>*** Show positive/correct signals in multiple samples/tissues</p> <p>** Show positive/correct signals in some but not all samples tested</p> <p>* show no signal or incorrect signals in all samples tested</p> |                  |            |              |             |            |                 |                              |

1046

1047

1048

**Table 3 Key resource table**

| Reagent type (species) or resource        | Designation                                      | Source or reference                                        | Identifiers                    | Additional information                                                                                                            |
|-------------------------------------------|--------------------------------------------------|------------------------------------------------------------|--------------------------------|-----------------------------------------------------------------------------------------------------------------------------------|
| biological sample (human tissue specimen) | TMA:TMA-1207                                     | Protein Biotechnologies                                    | Cat: TMA-1207                  | <a href="http://www.proteinbiotechnologies.com/pdf/TMA-1207.pdf">http://www.proteinbiotechnologies.com/pdf/TMA-1207.pdf</a>       |
| biological sample (human tissue specimen) | TMA:MTU481                                       | Biomax                                                     | Cat: MTU-481                   | <a href="https://www.biomax.us/tissue-arrays/Multiple_Organ/MTU481">https://www.biomax.us/tissue-arrays/Multiple_Organ/MTU481</a> |
| antibody                                  | Alexa-488 anti-Rabbit antibodies (Fab)           | ThermoFisher Scientific                                    | Cat: A-11034 (RRID:AB_2576217) | Dilution 1:2000                                                                                                                   |
| antibody                                  | Alexa-555 anti-Rat antibodies                    | ThermoFisher Scientific                                    | Cat: A-21434 (RRID:AB_141733)  | Dilution 1:2000                                                                                                                   |
| antibody                                  | Alexa-647 anti-Mouse antibodies (Fab)            | ThermoFisher Scientific                                    | Cat: A-21236 (RRID:AB_141725)  | Dilution 1:2000                                                                                                                   |
| chemical compound, drug                   | Hoechst 33342                                    | ThermoFisher Scientific                                    | Cat: H3570                     | <a href="https://www.thermofisher.com/order/catalog/product/H3570">https://www.thermofisher.com/order/catalog/product/H3570</a>   |
| software, algorithm                       | ImageJ                                           | PMID:22930834                                              | RRID: SCR_003070               | <a href="https://imagej.nih.gov/ij/">https://imagej.nih.gov/ij/</a>                                                               |
| software, algorithm                       | Matlab                                           | MathWorks, Inc.                                            | RRID:SCR_001622                |                                                                                                                                   |
| software, algorithm                       | Ashlar                                           | Laboratory of Systems Pharmacology, Harvard Medical School | RRID:SCR_016266                | <a href="https://github.com/sorgerlab/ashlar">https://github.com/sorgerlab/ashlar</a>                                             |
| other                                     | <a href="http://www.cycif.org">www.cycif.org</a> | Laboratory of Systems Pharmacology, Harvard Medical School | RRID:SCR_016267                | online resource for cyclic immunofluorescence                                                                                     |

# REFERENCES

1. Bodenmiller, B. Multiplexed Epitope-Based Tissue Imaging for Discovery and Healthcare Applications. *Cell Syst.* **2**, 225–238 (2016).
2. Stack, E. C., Wang, C., Roman, K. A. & Hoyt, C. C. Multiplexed immunohistochemistry, imaging, and quantitation: A review, with an assessment of Tyramide signal amplification, multispectral imaging and multiplex analysis. *Methods* **70**, 46–58 (2014).
3. Tsujikawa, T. *et al.* Quantitative Multiplex Immunohistochemistry Reveals Myeloid-Inflamed Tumor-Immune Complexity Associated with Poor Prognosis. *Cell Rep.* **19**, 203–217 (2017).
4. Rimm, D. L. What brown cannot do for you. *Nat. Biotechnol.* **24**, 914–916 (2006).
5. Postow, M. A., Callahan, M. K. & Wolchok, J. D. Immune Checkpoint Blockade in Cancer Therapy. *J. Clin. Oncol. Off. J. Am. Soc. Clin. Oncol.* **33**, 1974–1982 (2015).
6. Garraway, L. A. & Lander, E. S. Lessons from the cancer genome. *Cell* **153**, 17–37 (2013).
7. Chapman, P. B. *et al.* Improved Survival with Vemurafenib in Melanoma with BRAF V600E Mutation. *N. Engl. J. Med.* **364**, 2507–2516 (2011).
8. Druker, B. J. & Lydon, N. B. Lessons learned from the development of an Abl tyrosine kinase inhibitor for chronic myelogenous leukemia. *J. Clin. Invest.* **105**, 3–7 (2000).
9. Hanahan, D. & Weinberg, R. A. Hallmarks of cancer: the next generation. *Cell* **144**, 646–674 (2011).
10. Tumeh, P. C. *et al.* PD-1 blockade induces responses by inhibiting adaptive immune resistance. *Nature* **515**, 568–571 (2014).
11. Tirosh, I. *et al.* Dissecting the multicellular ecosystem of metastatic melanoma by single-cell RNA-seq. *Science* **352**, 189–196 (2016).
12. Patel, A. P. *et al.* Single-cell RNA-seq highlights intratumoral heterogeneity in primary glioblastoma. *Science* **344**, 1396–1401 (2014).

- 1078 13. Giesen, C. *et al.* Highly multiplexed imaging of tumor tissues with subcellular resolution by mass  
1079 cytometry. *Nat. Methods* **11**, 417–422 (2014).
- 1080 14. Gerdes, M. J. *et al.* Highly multiplexed single-cell analysis of formalin-fixed, paraffin-embedded  
1081 cancer tissue. *Proc. Natl. Acad. Sci. U. S. A.* **110**, 11982–11987 (2013).
- 1082 15. Micheva, K. D. & Smith, S. J. Array tomography: a new tool for imaging the molecular architecture  
1083 and ultrastructure of neural circuits. *Neuron* **55**, 25–36 (2007).
- 1084 16. Remark, R. *et al.* In-depth tissue profiling using multiplexed immunohistochemical consecutive  
1085 staining on single slide. *Sci. Immunol.* **1**, aaf6925–aaf6925 (2016).
- 1086 17. Gerner, M. Y., Kastenmuller, W., Ifrim, I., Kabat, J. & Germain, R. N. Histo-cytometry: a method  
1087 for highly multiplex quantitative tissue imaging analysis applied to dendritic cell subset  
1088 microanatomy in lymph nodes. *Immunity* **37**, 364–376 (2012).
- 1089 18. Lee, J. H. *et al.* Highly multiplexed subcellular RNA sequencing in situ. *Science* **343**, 1360–1363  
1090 (2014).
- 1091 19. Angelo, M. *et al.* Multiplexed ion beam imaging of human breast tumors. *Nat. Med.* **20**, 436–442  
1092 (2014).
- 1093 20. Lin, J.-R., Fallahi-Sichani, M. & Sorger, P. K. Highly multiplexed imaging of single cells using a  
1094 high-throughput cyclic immunofluorescence method. *Nat. Commun.* **6**, 8390 (2015).
- 1095 21. Shi, S.-R., Shi, Y. & Taylor, C. R. Antigen Retrieval Immunohistochemistry. *J. Histochem.*  
1096 *Cytochem.* **59**, 13–32 (2011).
- 1097 22. Tang, X., He, J., Partin, J. & Vafai, A. Comparative analysis of direct fluorescence, Zenon labeling,  
1098 and quantum dot nanocrystal technology in immunofluorescence staining. *J. Immunoassay*  
1099 *Immunochem.* **31**, 250–257 (2010).
- 1100 23. Peng, T. *et al.* A BaSiC tool for background and shading correction of optical microscopy images.  
1101 *Nat. Commun.* **8**, 14836 (2017).

- 1102 24. Henze, G., Dummer, R., Joller-Jemelka, H. I., Böni, R. & Burg, G. Serum S100--a marker for  
1103 disease monitoring in metastatic melanoma. *Dermatol. Basel Switz.* **194**, 208–212 (1997).
- 1104 25. Carlton, P. M. *et al.* Fast live simultaneous multiwavelength four-dimensional optical microscopy.  
1105 *Proc. Natl. Acad. Sci. U. S. A.* **107**, 16016–16022 (2010).
- 1106 26. Chen, F., Tillberg, P. W. & Boyden, E. S. Optical imaging. Expansion microscopy. *Science* **347**,  
1107 543–548 (2015).
- 1108 27. Giesen, C. *et al.* Highly multiplexed imaging of tumor tissues with subcellular resolution by mass  
1109 cytometry. *Nat. Methods* **11**, 417–422 (2014).
- 1110 28. Goltsev, Y. *et al.* Deep profiling of mouse splenic architecture with CODEX multiplexed imaging.  
1111 *bioRxiv* 203166 (2017). doi:10.1101/203166
- 1112 29. Vassilakopoulou, M. *et al.* Preanalytical variables and phosphoepitope expression in FFPE tissue:  
1113 quantitative epitope assessment after variable cold ischemic time. *Lab. Investig. J. Tech. Methods*  
1114 *Pathol.* **95**, 334–341 (2015).
- 1115 30. Ellington, A. A., Kullo, I. J., Bailey, K. R. & Klee, G. G. Antibody-based protein multiplex  
1116 platforms: technical and operational challenges. *Clin. Chem.* **56**, 186–193 (2010).
- 1117 31. Wang, W., Lilyestrom, W. G., Hu, Z. Y. & Scherer, T. M. Cluster Size and Quinary Structure  
1118 Determine the Rheological Effects of Antibody Self-Association at High Concentrations. *J. Phys.*  
1119 *Chem. B* **122**, 2138–2154 (2018).
- 1120 32. Maaten, L. van der & Hinton, G. Visualizing Data using t-SNE. *J. Mach. Learn. Res.* **9**, 2579–2605  
1121 (2008).
- 1122 33. Mahadevan, D. & Von Hoff, D. D. Tumor-stroma interactions in pancreatic ductal adenocarcinoma.  
1123 *Mol. Cancer Ther.* **6**, 1186–1197 (2007).
- 1124 34. Jones, S. *et al.* Core Signaling Pathways in Human Pancreatic Cancers Revealed by Global Genomic  
1125 Analyses. *Science* **321**, 1801–1806 (2008).

- 1126 35. Vogelstein, B. *et al.* Cancer Genome Landscapes. *Science* **339**, 1546–1558 (2013).
- 1127 36. Jeong, W.-J. *et al.* Ras stabilization through aberrant activation of Wnt/ $\beta$ -catenin signaling promotes  
1128 intestinal tumorigenesis. *Sci. Signal.* **5**, ra30 (2012).
- 1129 37. Bologna-Molina, R., Mosqueda-Taylor, A., Molina-Frechero, N., Mori-Estevez, A. D. & Sánchez-  
1130 Acuña, G. Comparison of the value of PCNA and Ki-67 as markers of cell proliferation in  
1131 ameloblastic tumor. *Med. Oral Patol. Oral Cir. Bucal* **18**, e174–e179 (2013).
- 1132 38. Mahoney, K. M. & Atkins, M. B. Prognostic and predictive markers for the new immunotherapies.  
1133 *Oncol. Williston Park N* **28 Suppl 3**, 39–48 (2014).
- 1134 39. Sharma, P. & Allison, J. P. The future of immune checkpoint therapy. *Science* **348**, 56–61 (2015).
- 1135 40. Varadhachary, G. R. & Raber, M. N. Cancer of Unknown Primary Site. *N. Engl. J. Med.* **371**, 757–  
1136 765 (2014).
- 1137 41. Turner, N. C. & Reis-Filho, J. S. Genetic heterogeneity and cancer drug resistance. *Lancet Oncol.*  
1138 **13**, e178–e185 (2012).
- 1139 42. Brennan, C. W. *et al.* The somatic genomic landscape of glioblastoma. *Cell* **155**, 462–477 (2013).
- 1140 43. Olar, A. & Aldape, K. D. Using the molecular classification of glioblastoma to inform personalized  
1141 treatment. *J. Pathol.* **232**, 165–177 (2014).
- 1142 44. Wang, Y. *et al.* Rapid Sequential In Situ Multiplexing With DNA-Exchange-Imaging. *bioRxiv*  
1143 112227 (2017). doi:10.1101/112227
- 1144 45. RFA-CA-17-034: Human Tumor Atlases (HTA) Research Centers (U2C). Available at:  
1145 <https://grants.nih.gov/grants/guide/rfa-files/rfa-ca-17-034.html>. (Accessed: 29th April 2018)
- 1146 46. Zeitouni, D., Pylayeva-Gupta, Y., Der, C. J. & Bryant, K. L. KRAS Mutant Pancreatic Cancer: No  
1147 Lone Path to an Effective Treatment. *Cancers* **8**, (2016).
- 1148 47. Phillips, H. S. *et al.* Molecular subclasses of high-grade glioma predict prognosis, delineate a pattern  
1149 of disease progression, and resemble stages in neurogenesis. *Cancer Cell* **9**, 157–173 (2006).

- 1150 48. Izar, B. *et al.* Abstract AP19: SINGLE-CELL RNA-SEQUENCING OF PATIENT-DERIVED  
1151 OVARIAN CANCER CELLS AND PATIENT-DERIVED XENOGRAFT MODELS. *Clin. Cancer*  
1152 *Res.* **23**, AP19-AP19 (2017).
- 1153 49. Sachs, K., Gifford, D., Jaakkola, T., Sorger, P. & Lauffenburger, D. A. Bayesian network approach  
1154 to cell signaling pathway modeling. *Sci. STKE Signal Transduct. Knowl. Environ.* **2002**, pe38  
1155 (2002).
- 1156 50. Vilela, M. & Danuser, G. What's wrong with correlative experiments? *Nat. Cell Biol.* **13**, 1011  
1157 (2011).
- 1158 51. Lee, J. H. *et al.* Fluorescent *in situ* sequencing (FISSEQ) of RNA for gene expression profiling in  
1159 intact cells and tissues. *Nat. Protoc.* **10**, 442 (2015).
- 1160 52. Wang, Y. *et al.* Rapid Sequential *in Situ* Multiplexing with DNA Exchange Imaging in Neuronal  
1161 Cells and Tissues. *Nano Lett.* **17**, 6131-6139 (2017).
- 1162 53. Hiraoka, Y., Sedat, J. W. & Agard, D. A. Determination of three-dimensional imaging properties of  
1163 a light microscope system. Partial confocal behavior in epifluorescence microscopy. *Biophys. J.* **57**,  
1164 325-333 (1990).
- 1165 54. Gustafsson, M. G. L. *et al.* Three-dimensional resolution doubling in wide-field fluorescence  
1166 microscopy by structured illumination. *Biophys. J.* **94**, 4957-4970 (2008).
- 1167 55. Amir, E. D. *et al.* viSNE enables visualization of high dimensional single-cell data and reveals  
1168 phenotypic heterogeneity of leukemia. *Nat. Biotechnol.* **31**, 545-552 (2013).
- 1169 56. Bagwell, C. B. Hyperlog-a flexible log-like transform for negative, zero, and positive valued data.  
1170 *Cytom. Part J. Int. Soc. Anal. Cytol.* **64**, 34-42 (2005).
- 1171 57. Jeremy M. 2018 ASHLAR (RRID:SCR\_016266): Alignment by Simultaneous Harmonization of  
1172 Layer/Adjacency Registration. Github. <https://github.com/sorgerlab/ashlar>. 0dfd5ba
- 1173 58. Lin J. 2018 CyCIF image analysis scripts. Github. <https://github.com/sorgerlab/cycif>. 7743c1a.

# Figure 1

**A**

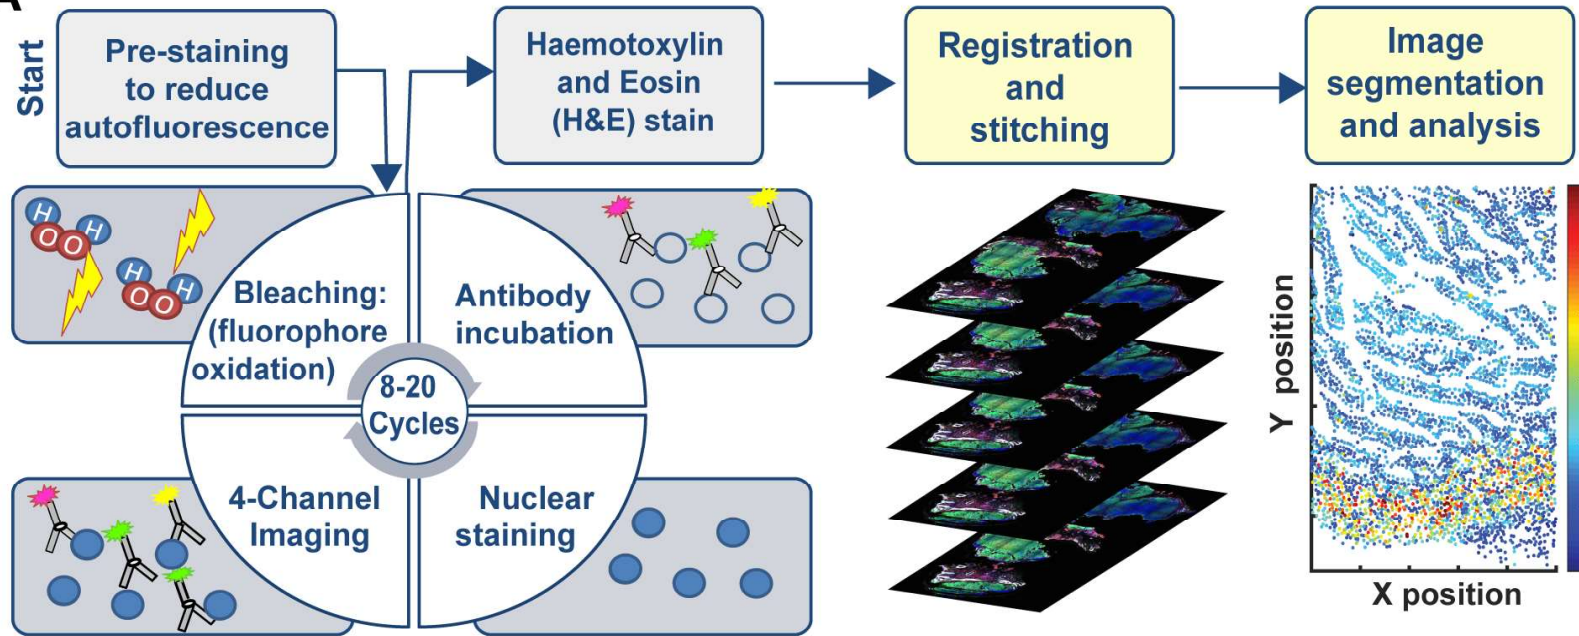

**B**

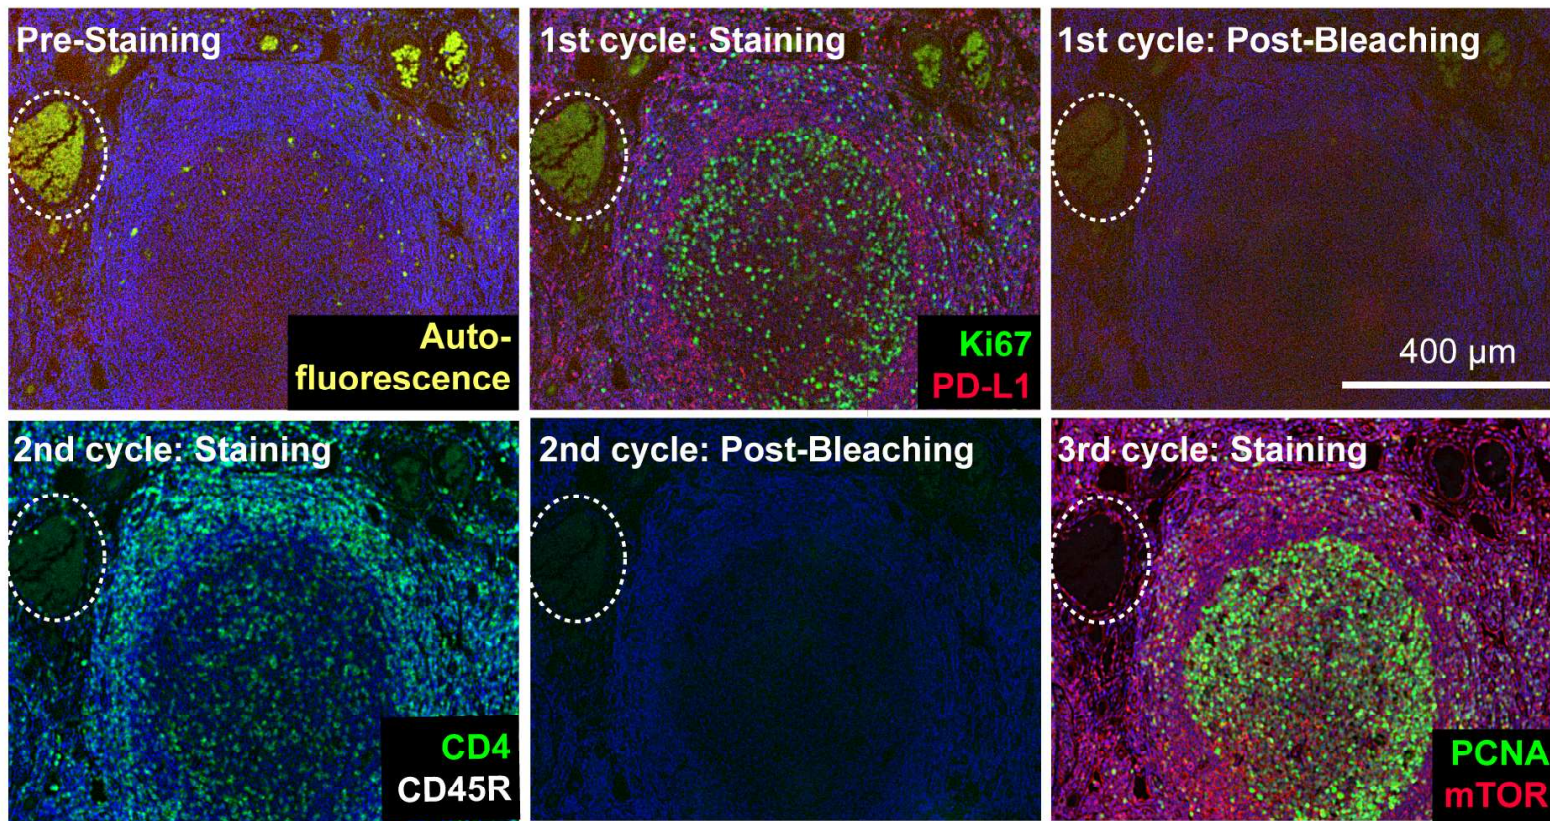

## Figure 2

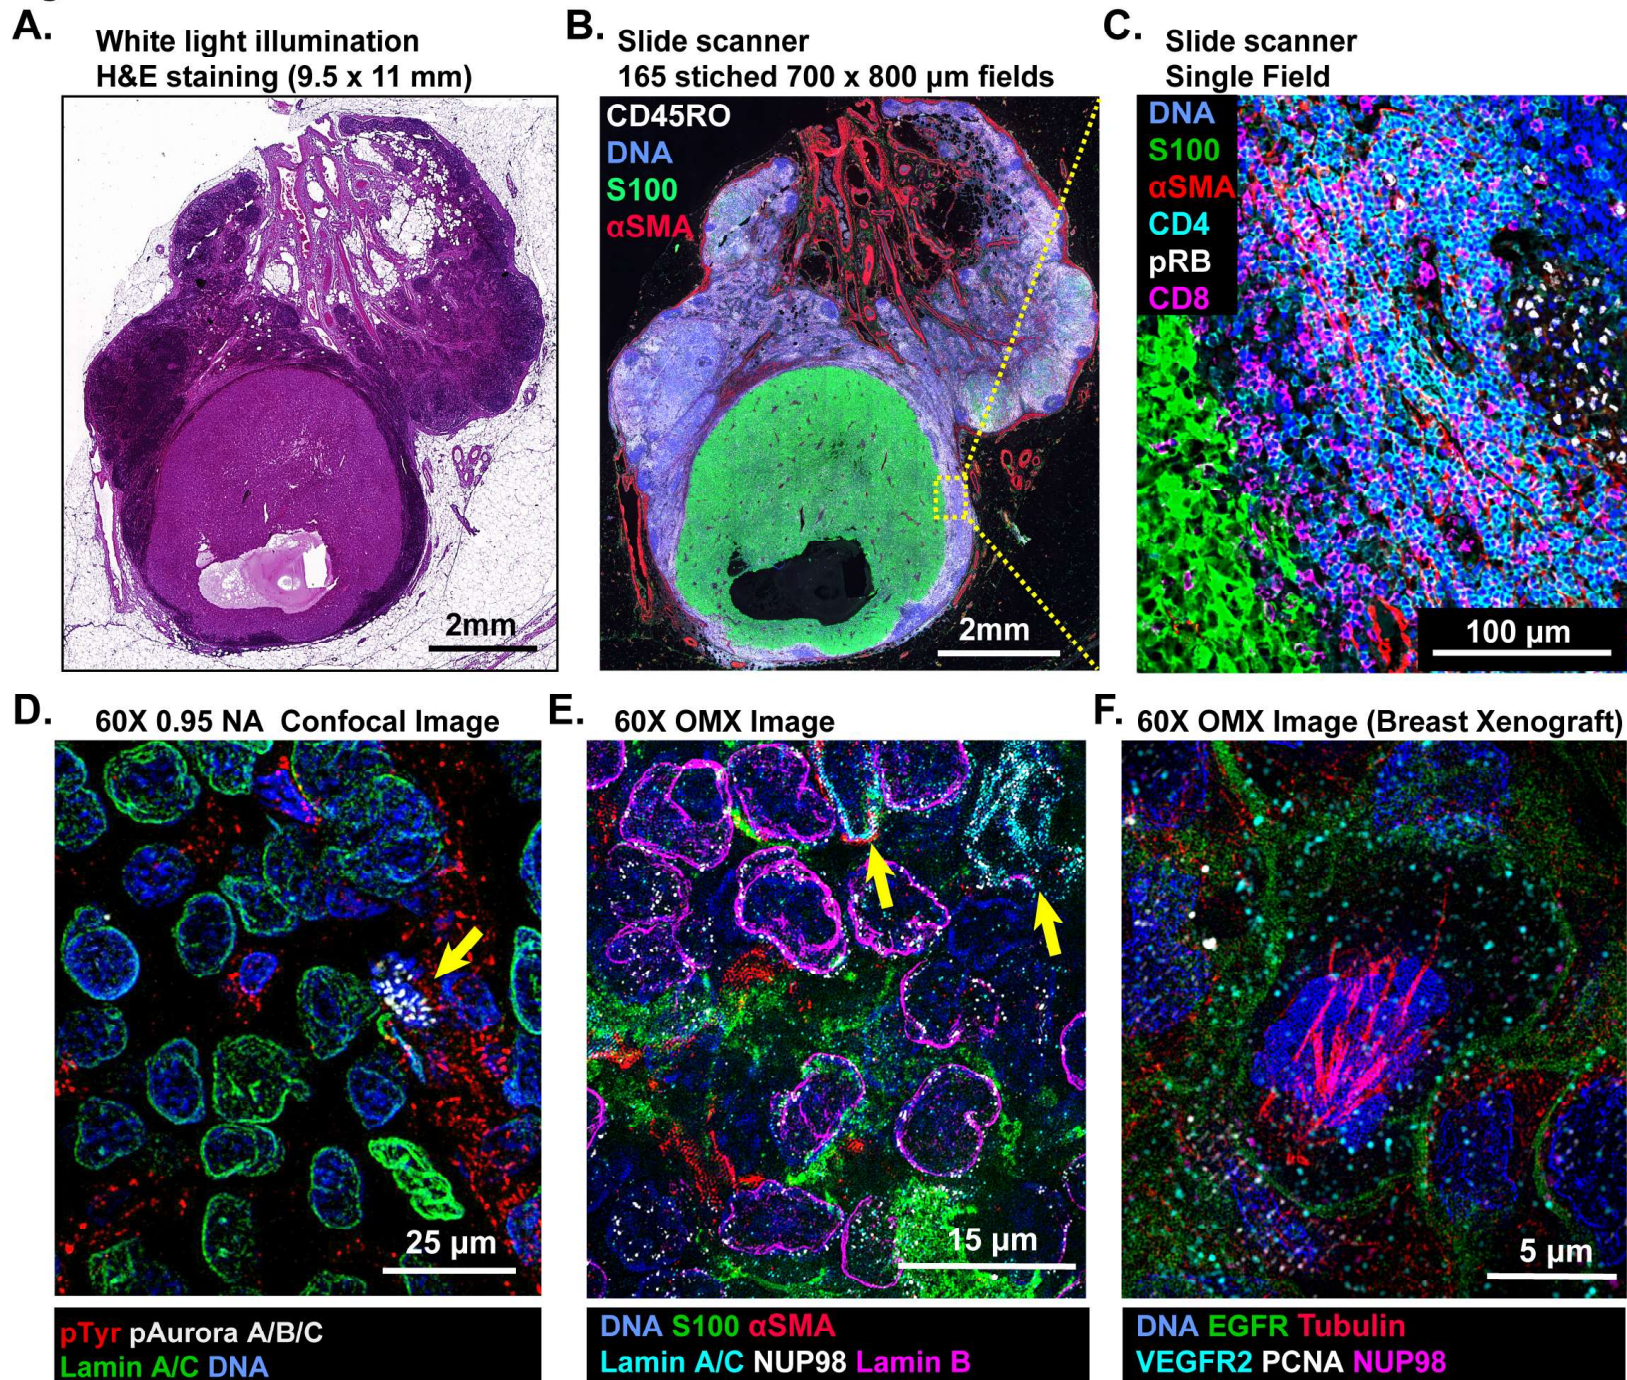

**Figure 3**

**A.**

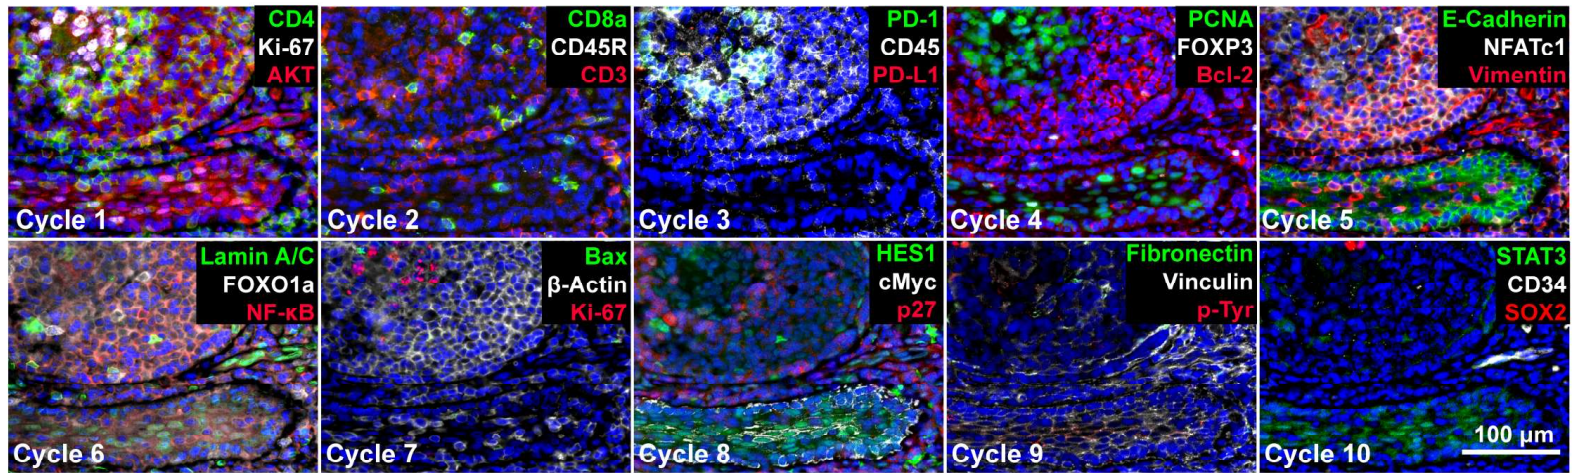

**B.**

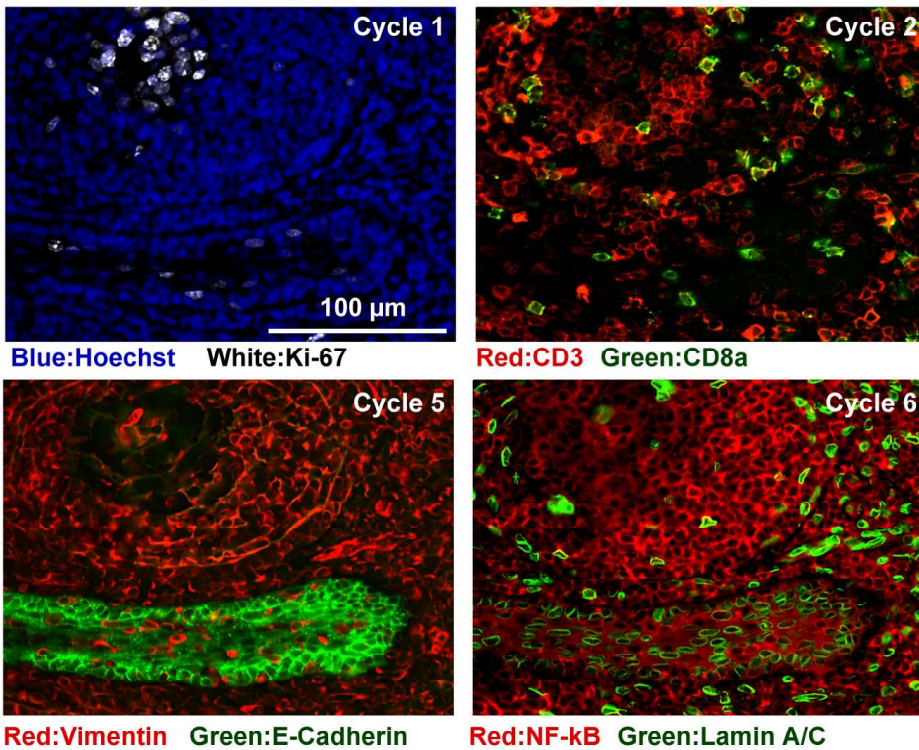

**C.**

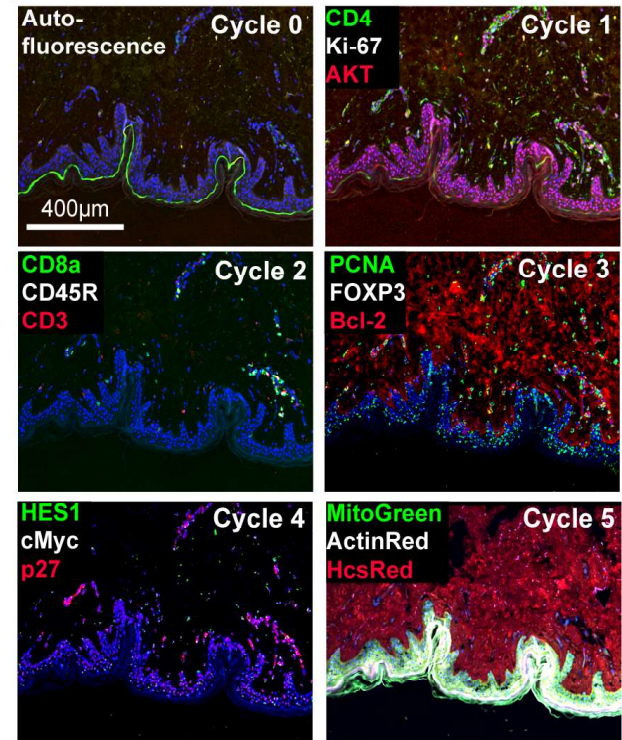

# Figure 4

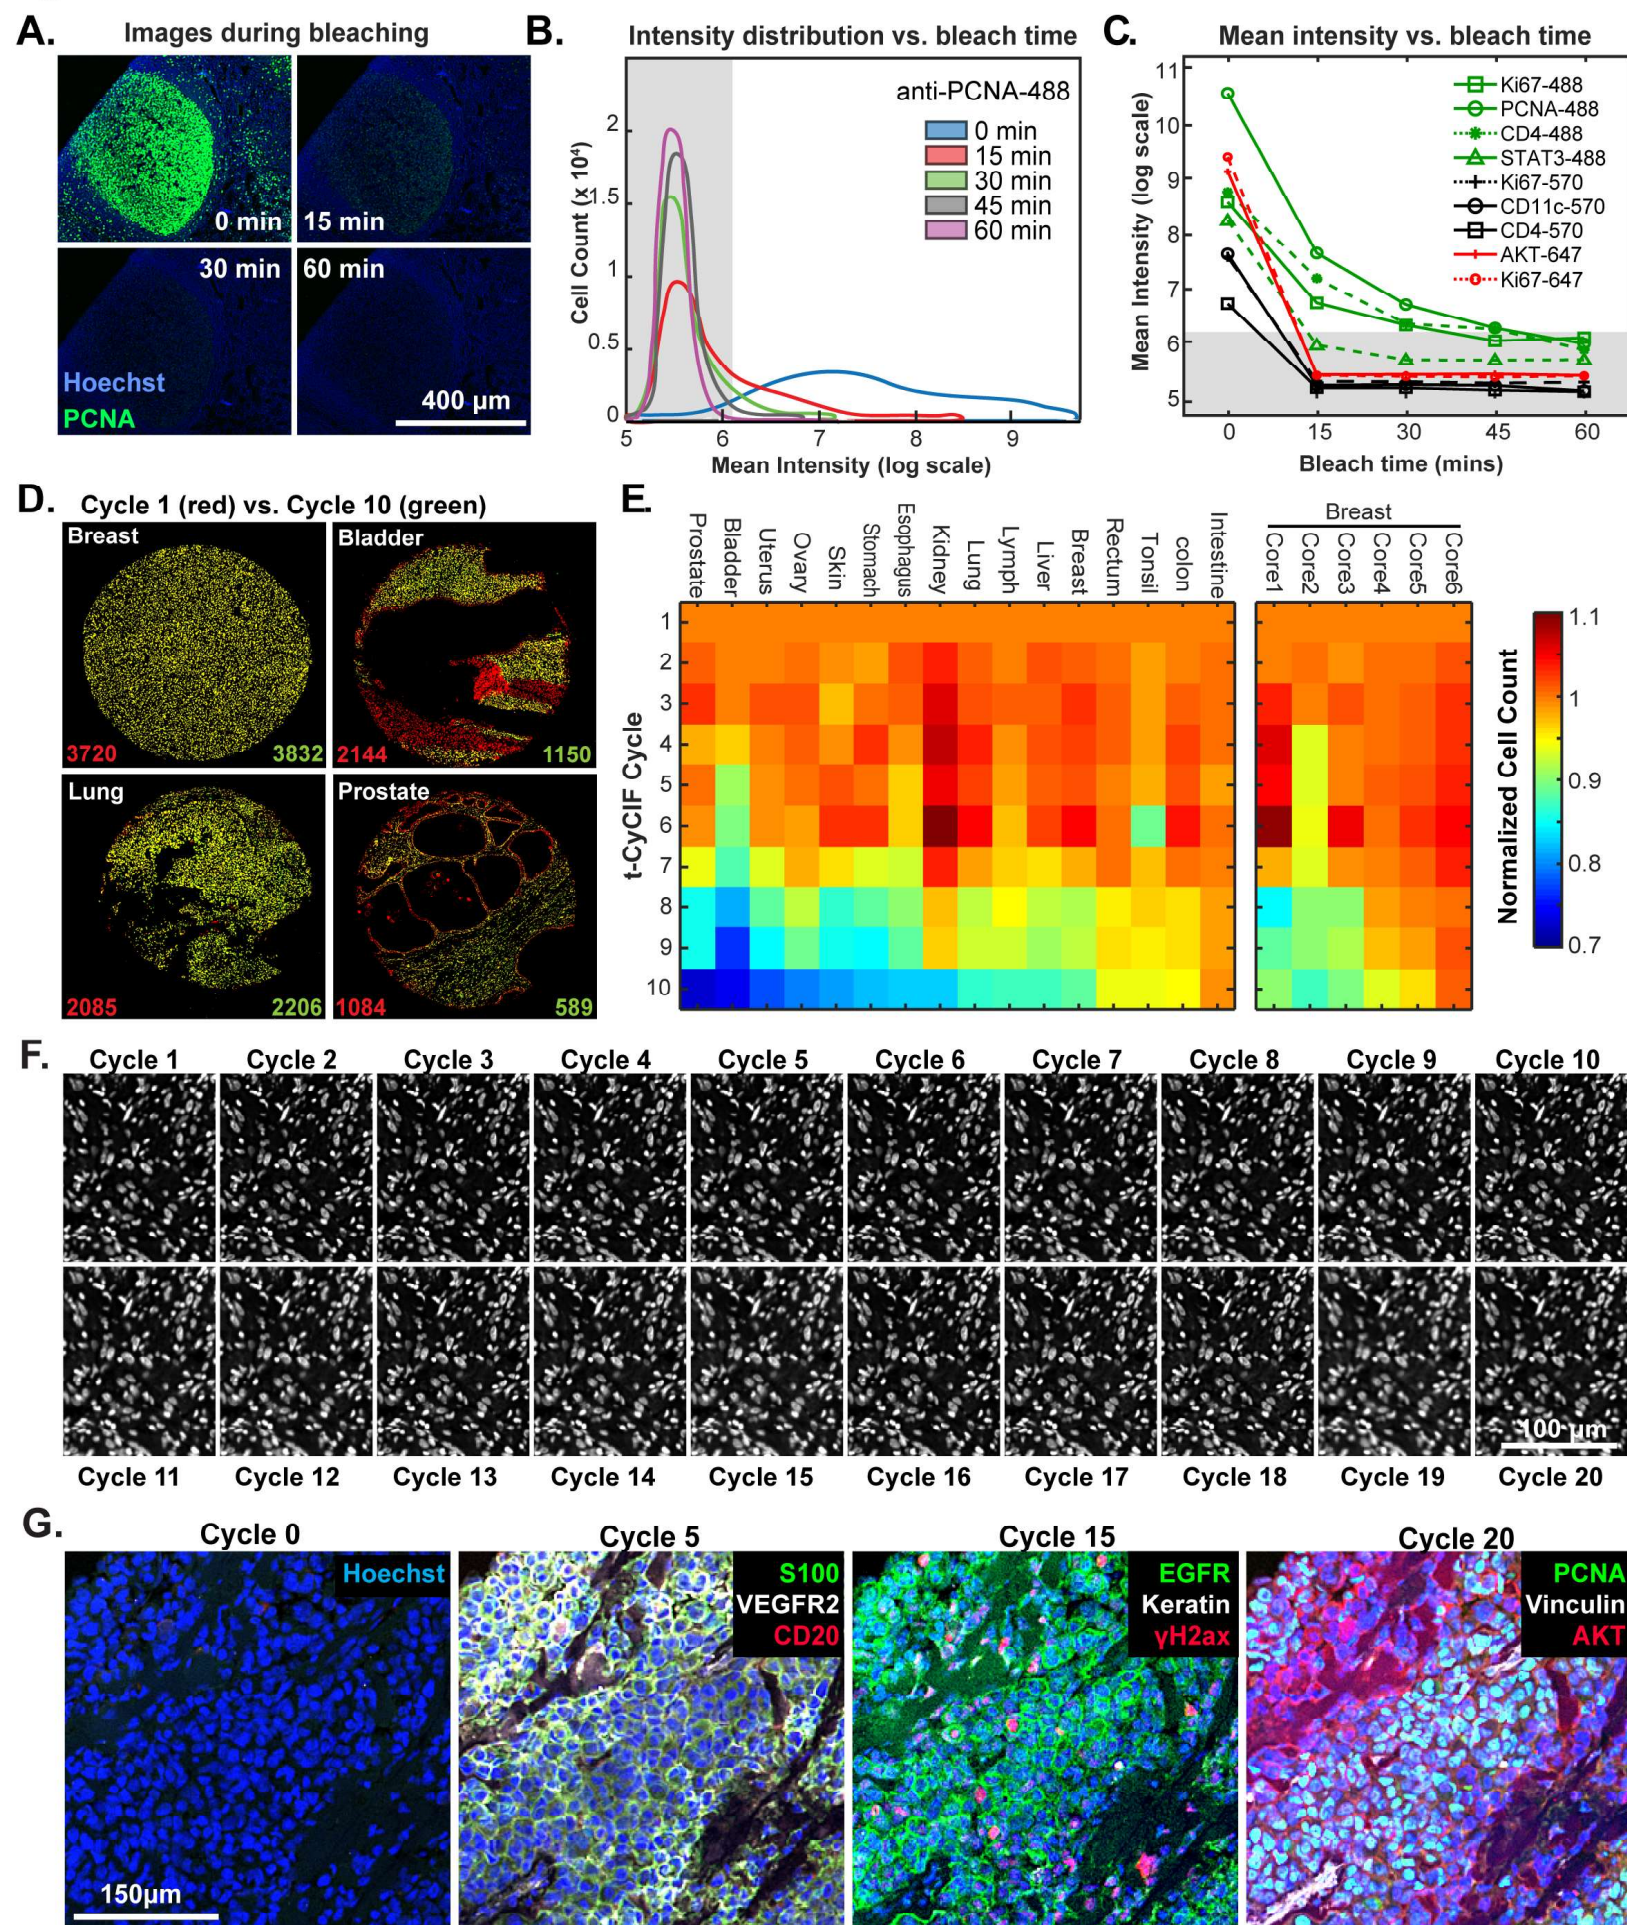

## Figure 5

A.

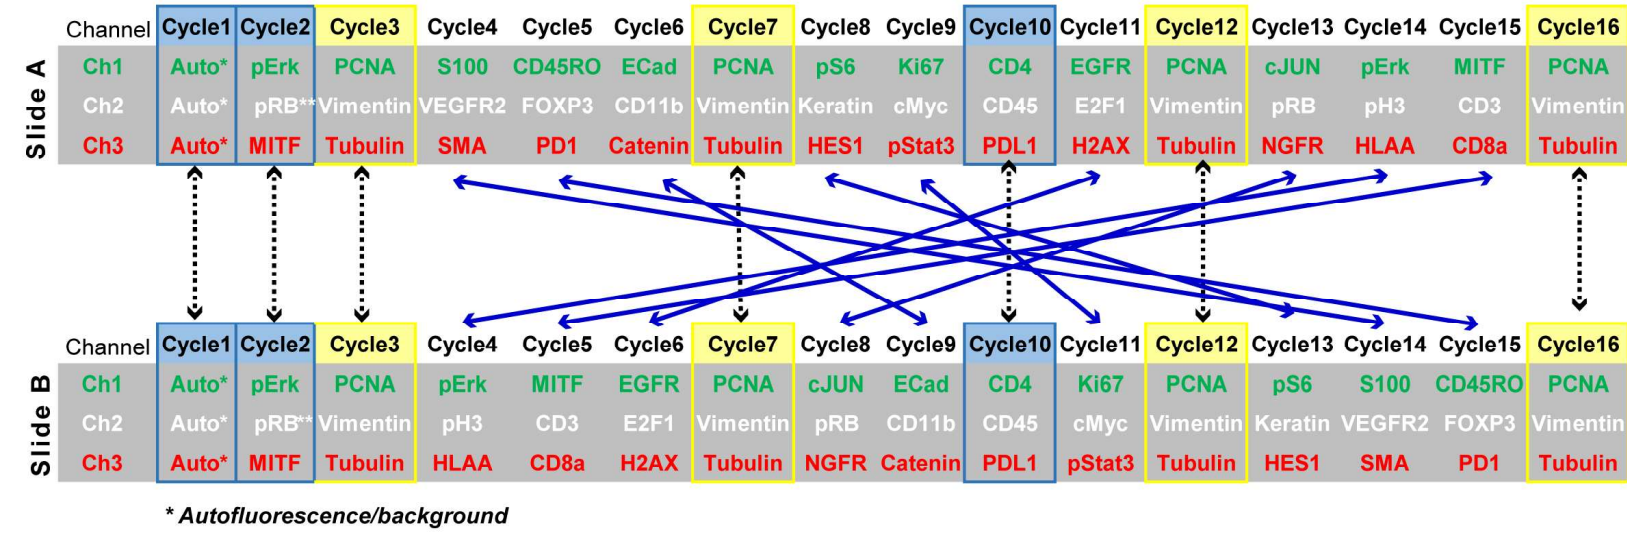

B.

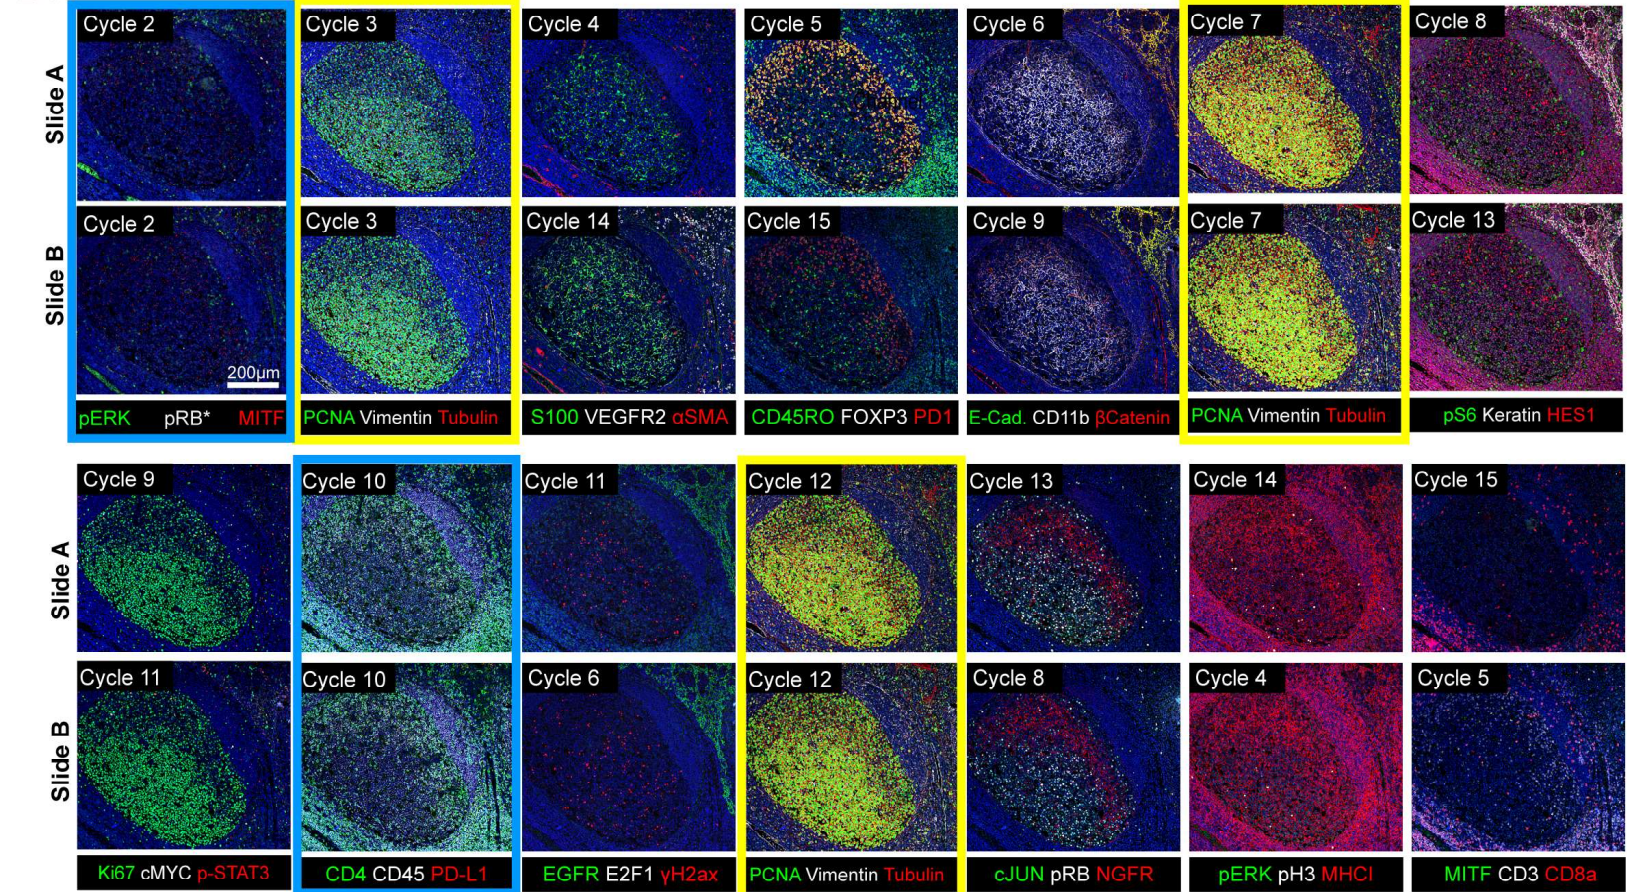

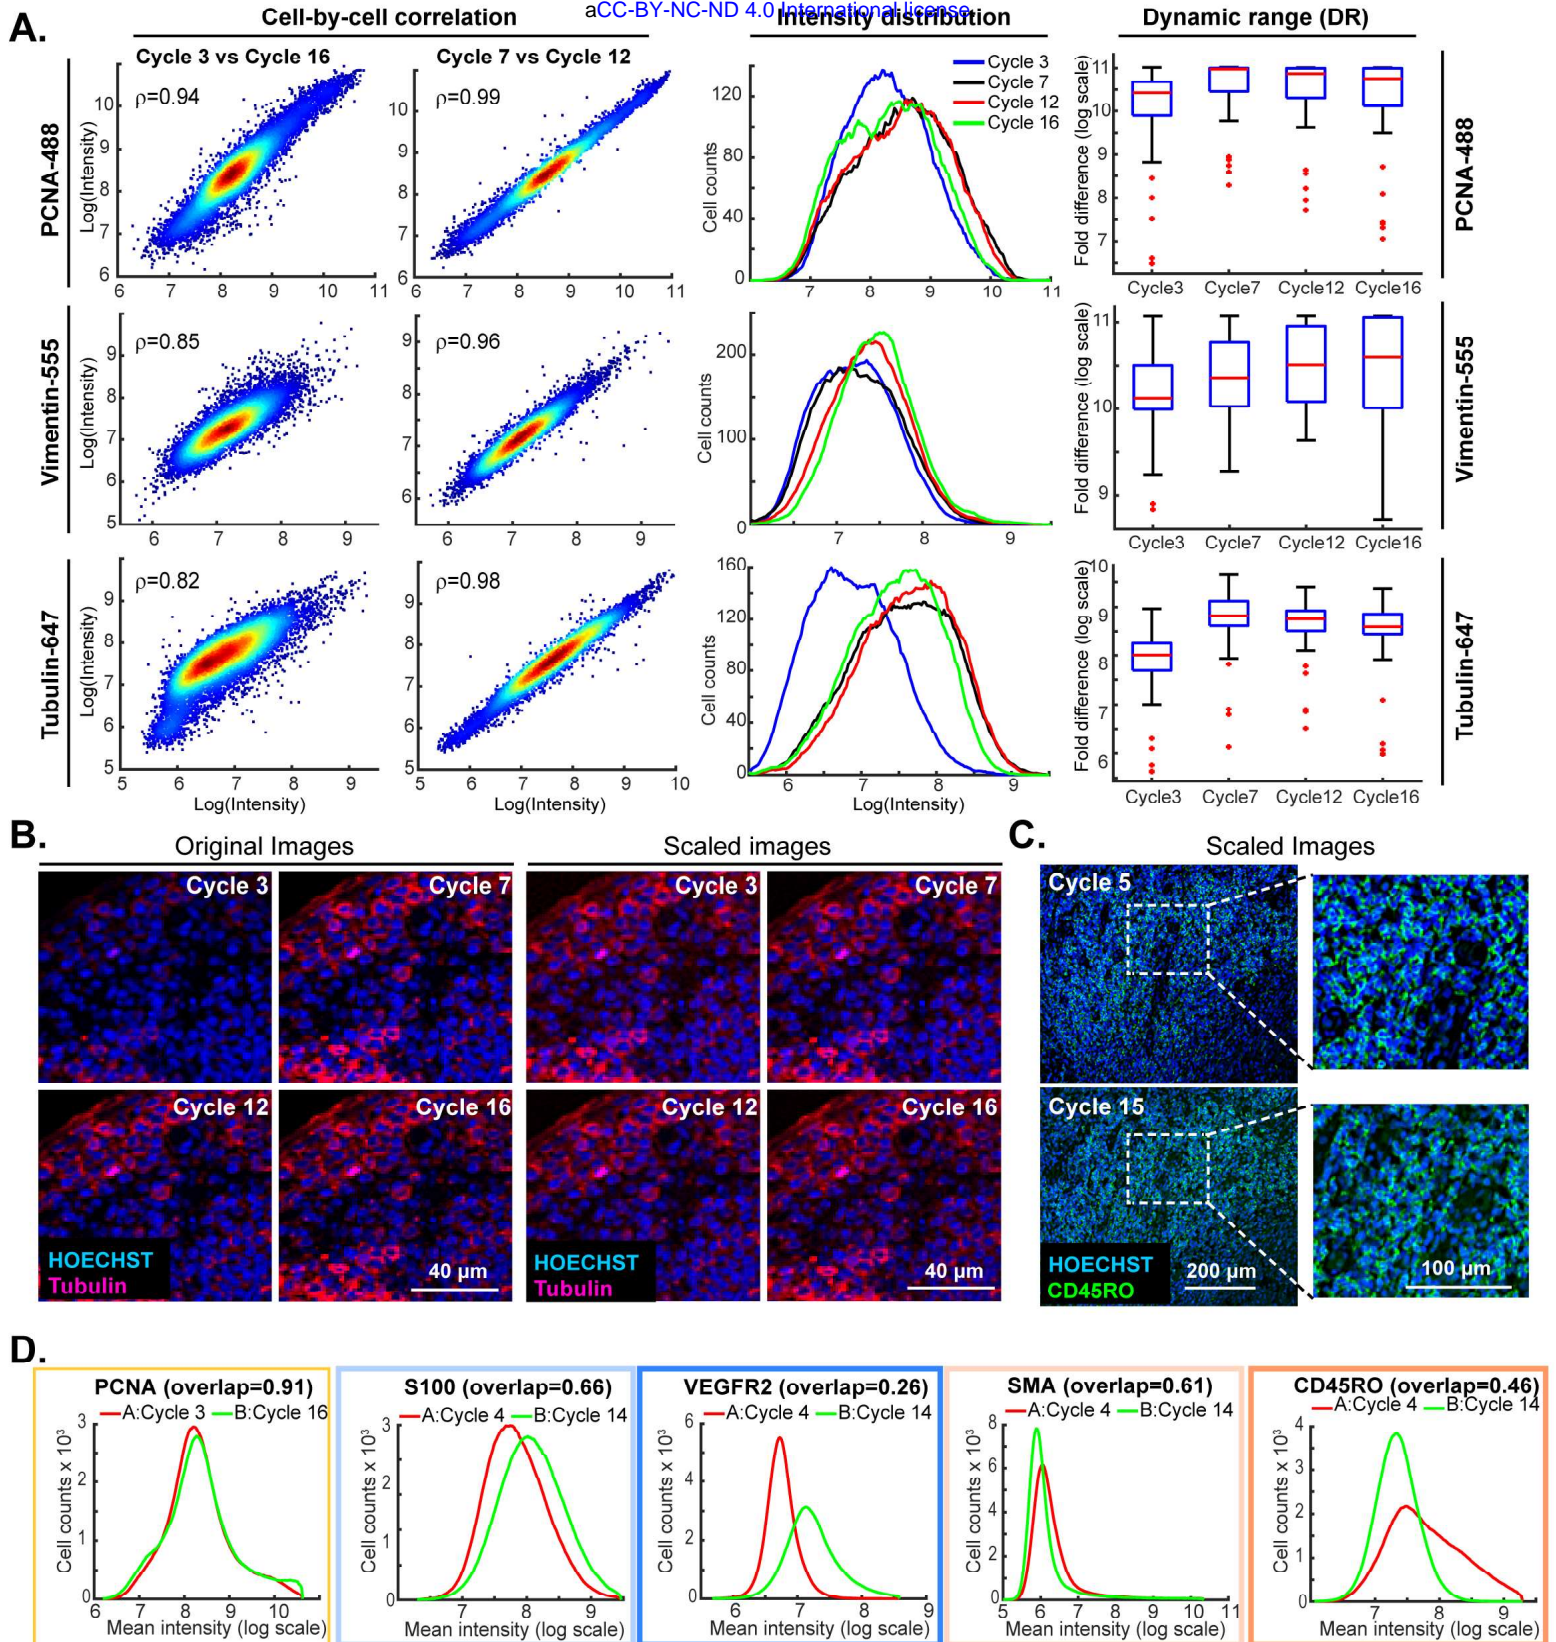

**E.**

| Effect of cycle number           | Overlap Integral | Antibodies                                                                                      |
|----------------------------------|------------------|-------------------------------------------------------------------------------------------------|
| Little or no change              | >0.8             | PCNA, E2F1, gH2ax, cJUN, NGFR, pERK, HLA, MITF, pS6, Keratin, beta- Catenin, E-Cadherin , FoxP3 |
| Minor Increase with Cycle Number | 0.6 to 0.8       | S100, Ki67, pH3, Vimentin, pRB                                                                  |
| Major increase with Cycle number | <0.6             | VEGFR2, EGFR, CD8a, Tubulin                                                                     |
| Minor Decrease with Cycle Number | 0.6 to 0.8       | CD11b, HES1, SMA                                                                                |
| Major Decrease with Cycle Number | <0.6             | CD45RO, PD1, CD3                                                                                |

**F.**

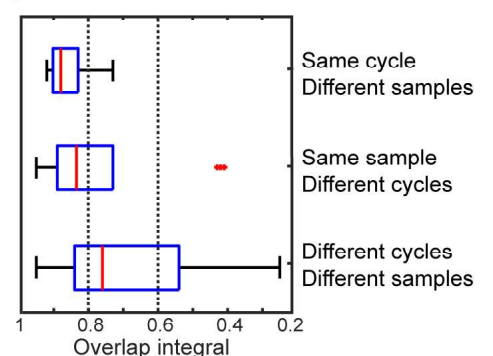

Figure 7

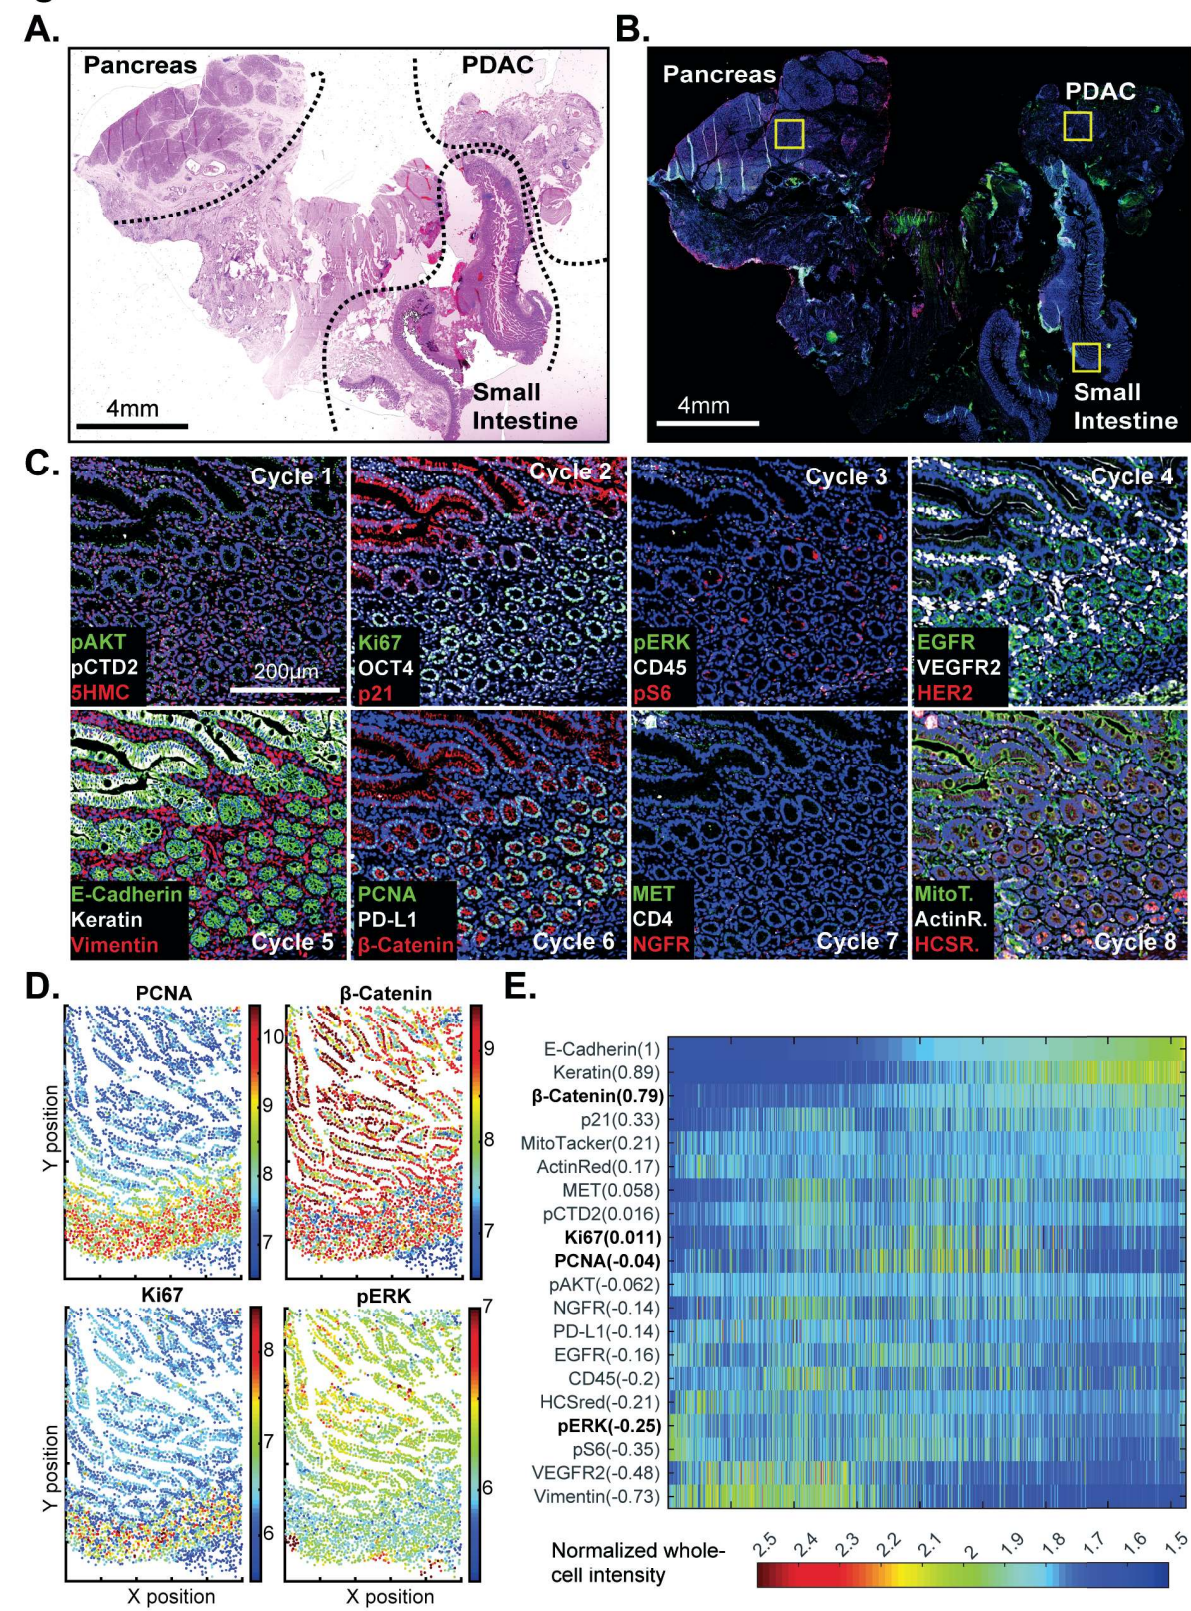

# Figure 8

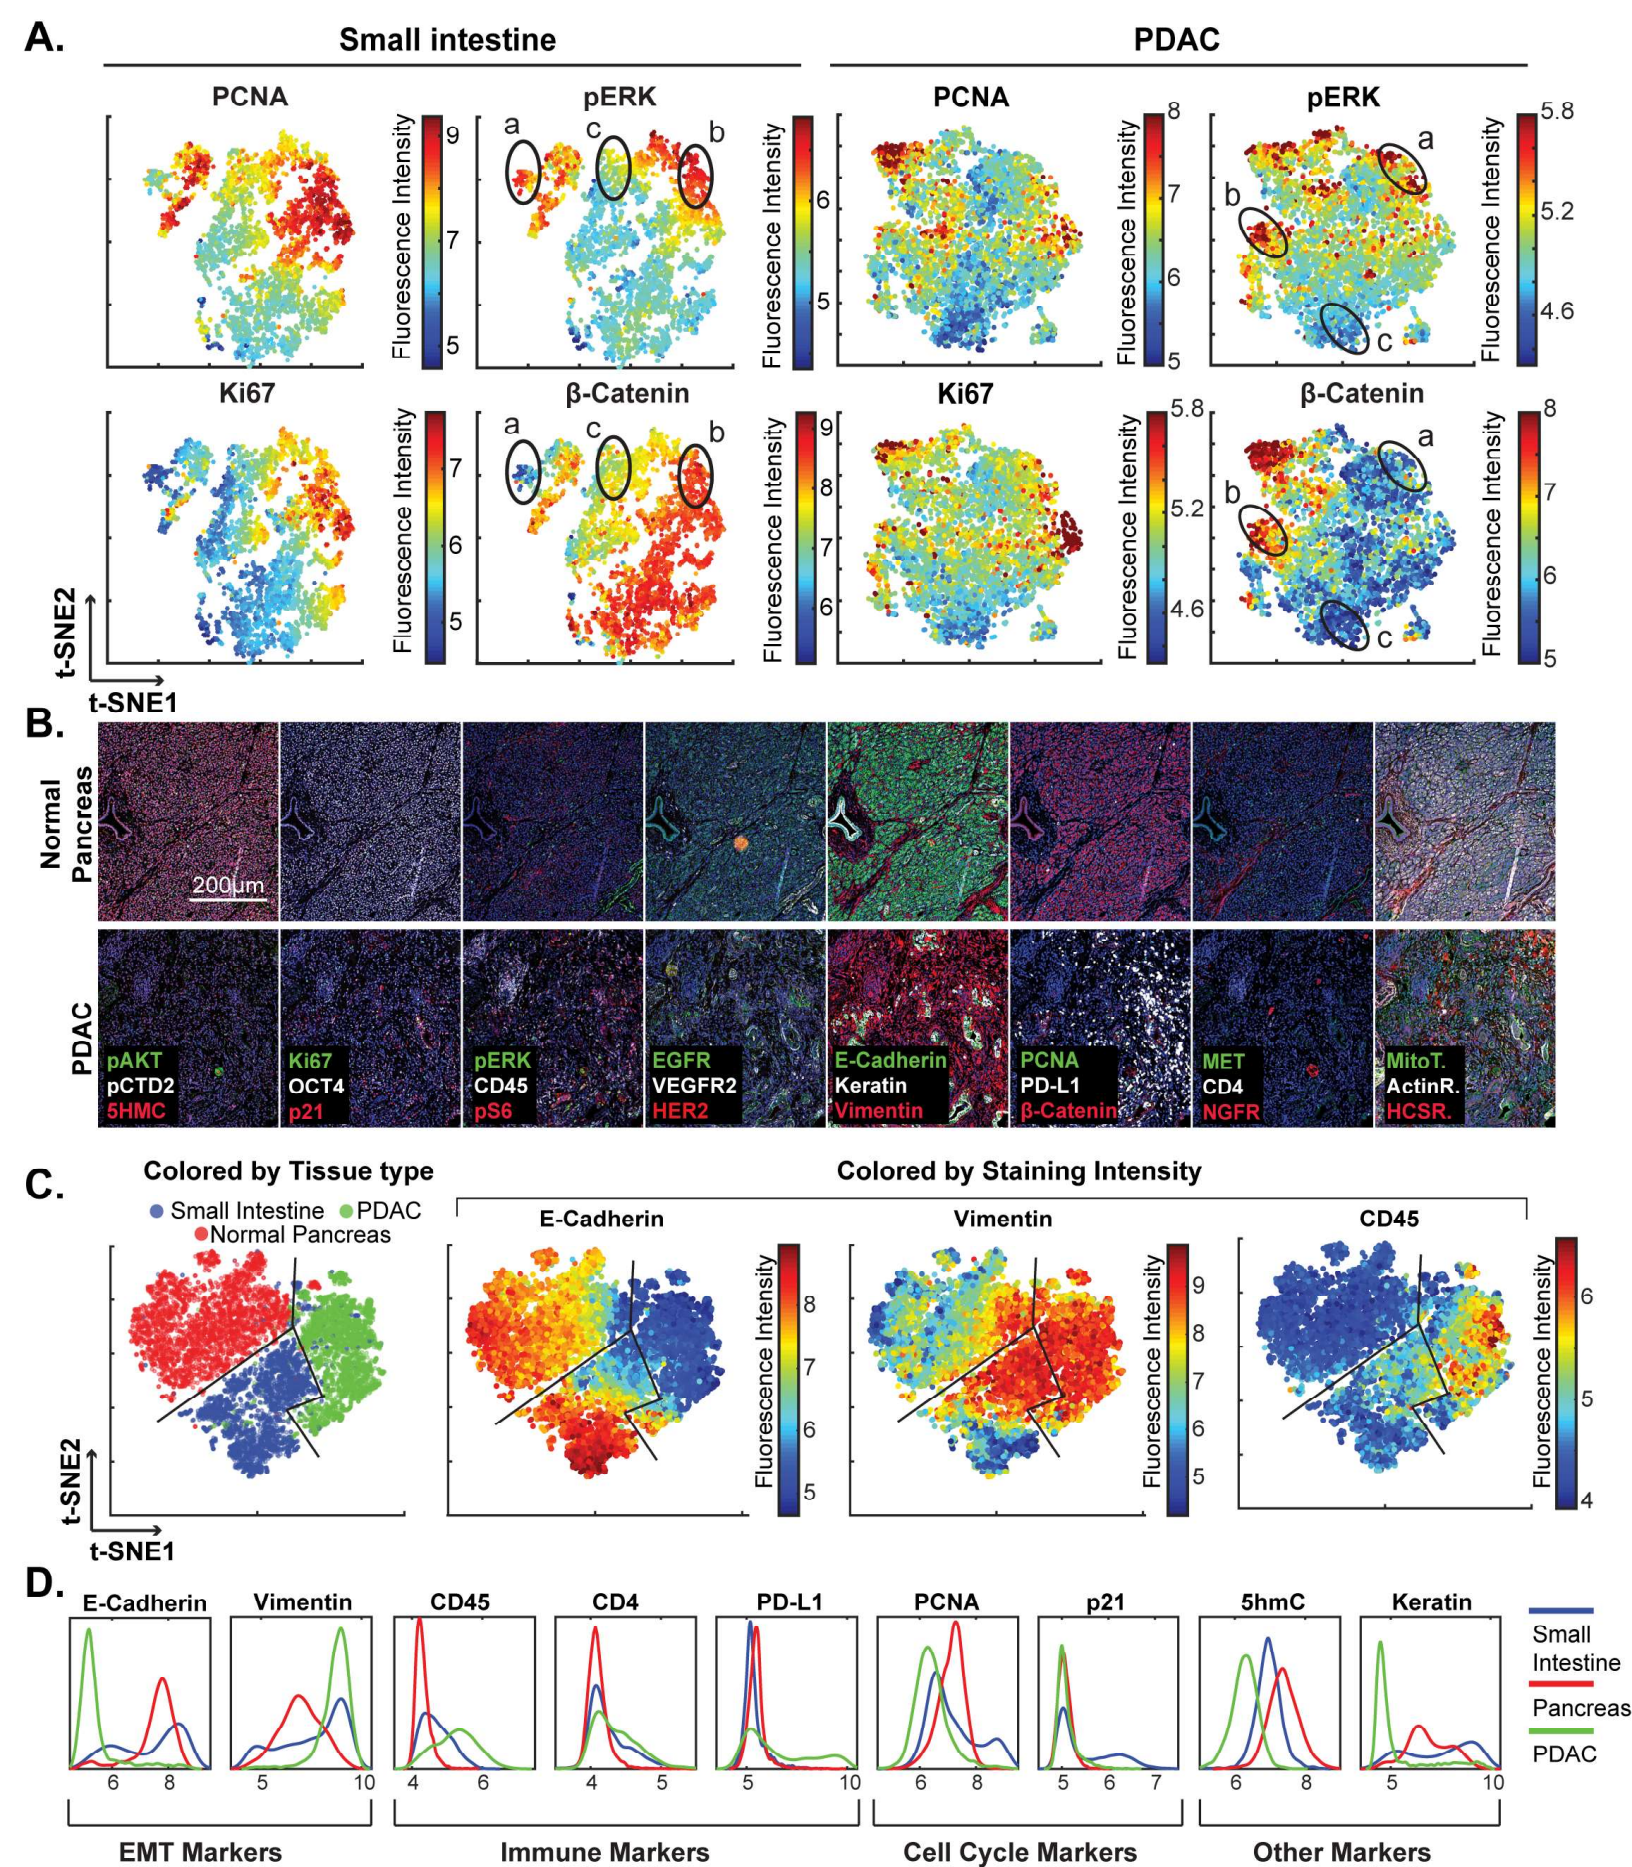

## Figure 9

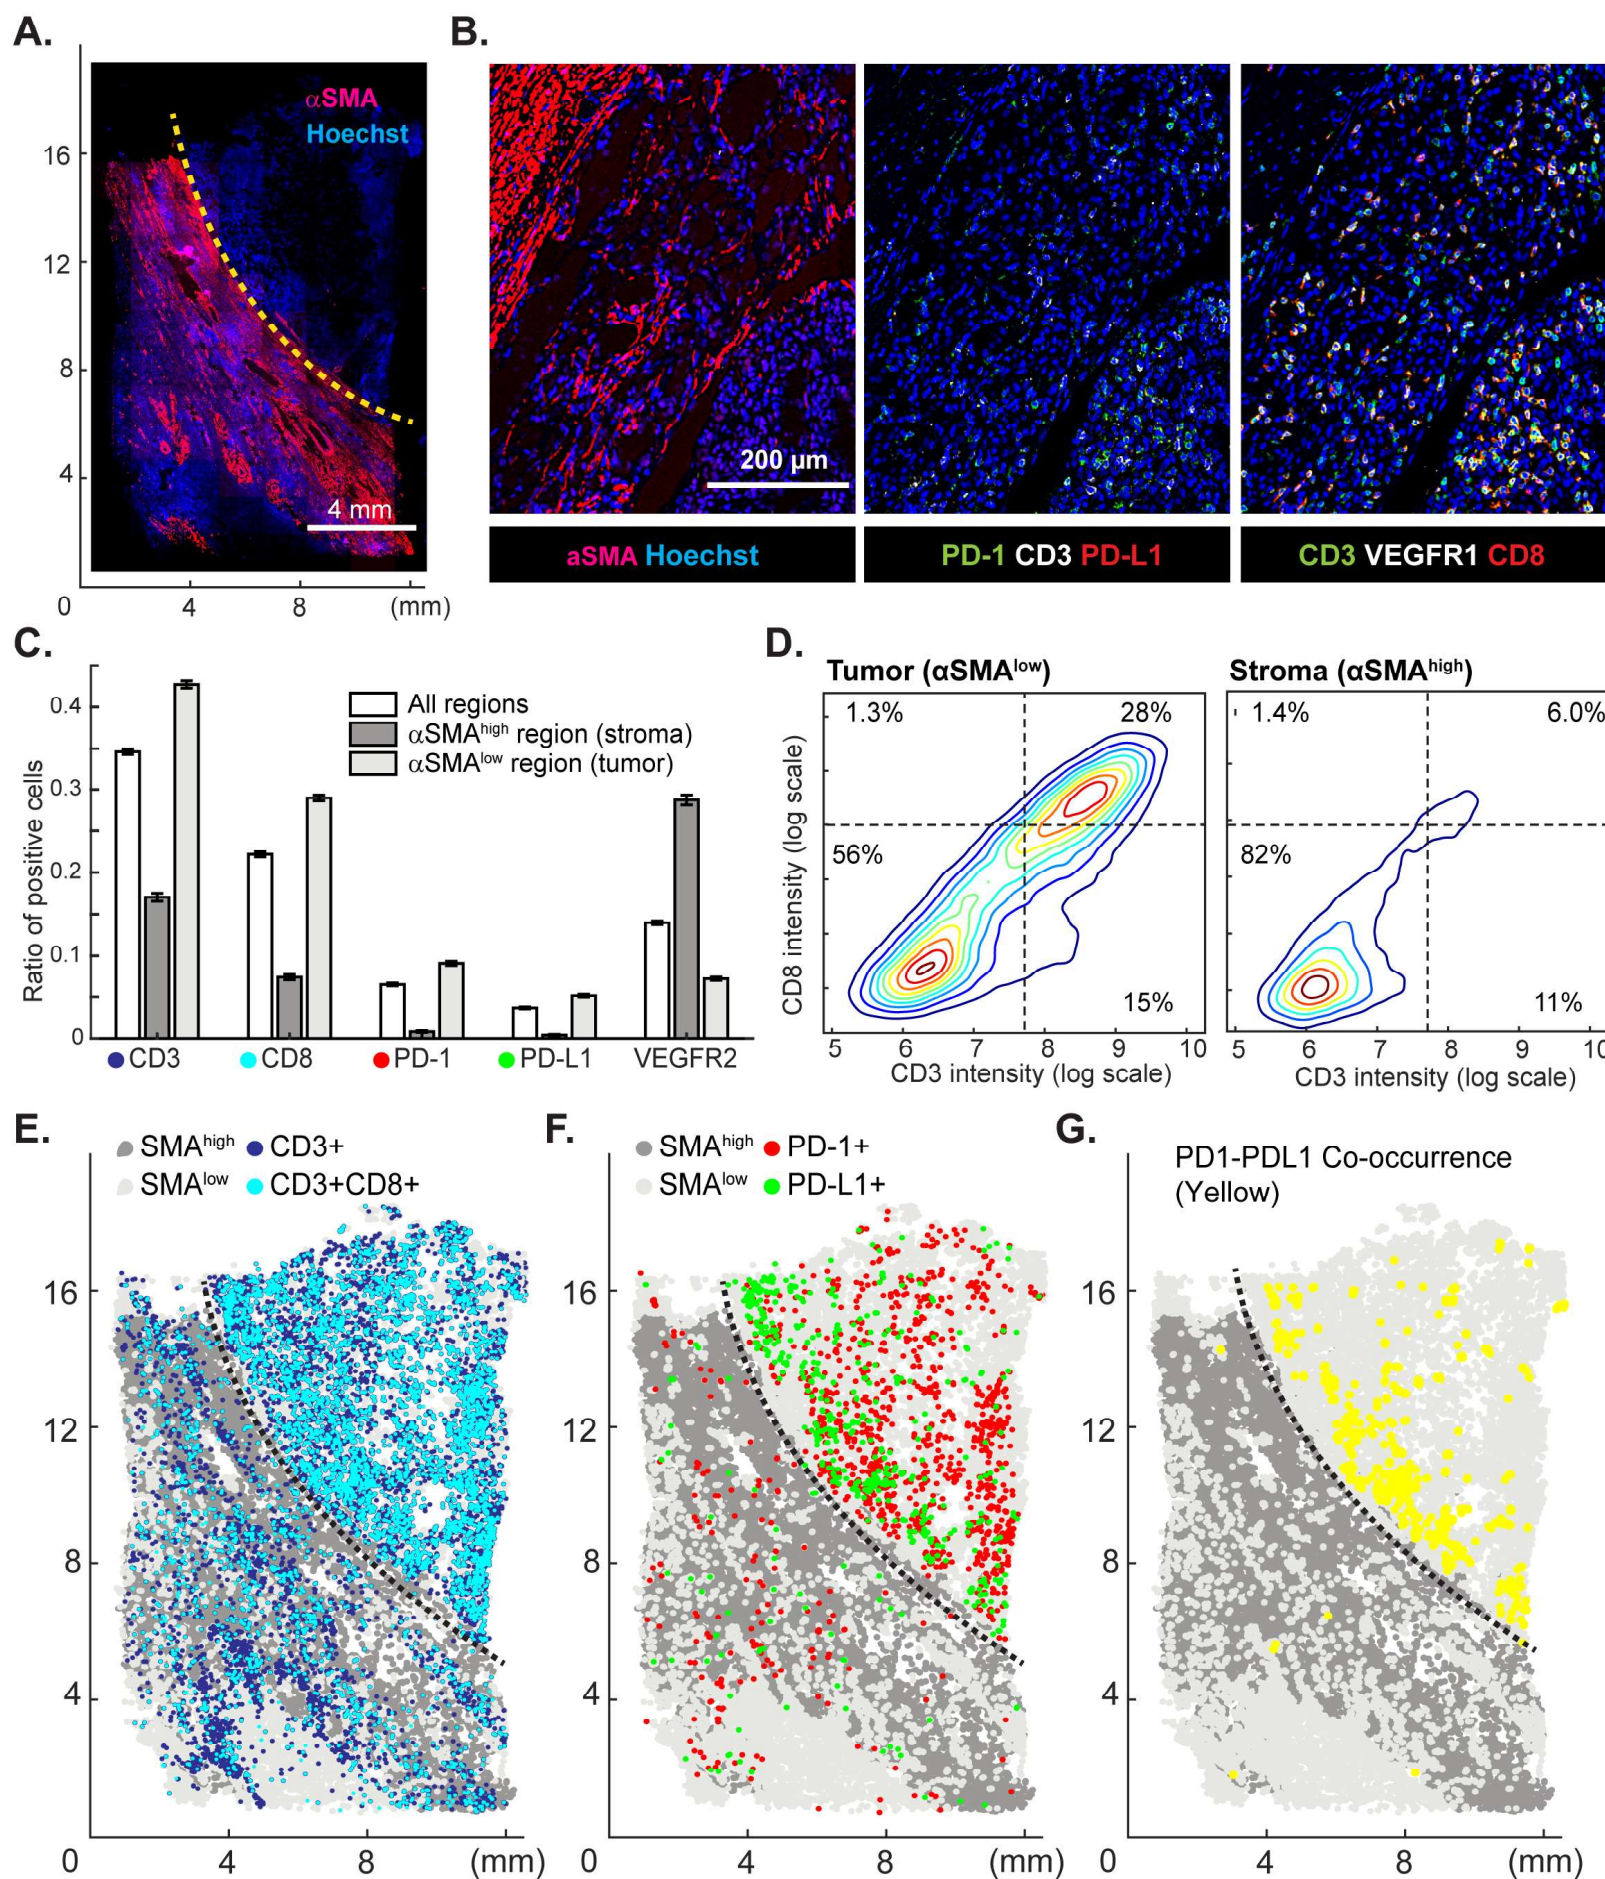



# Figure 11

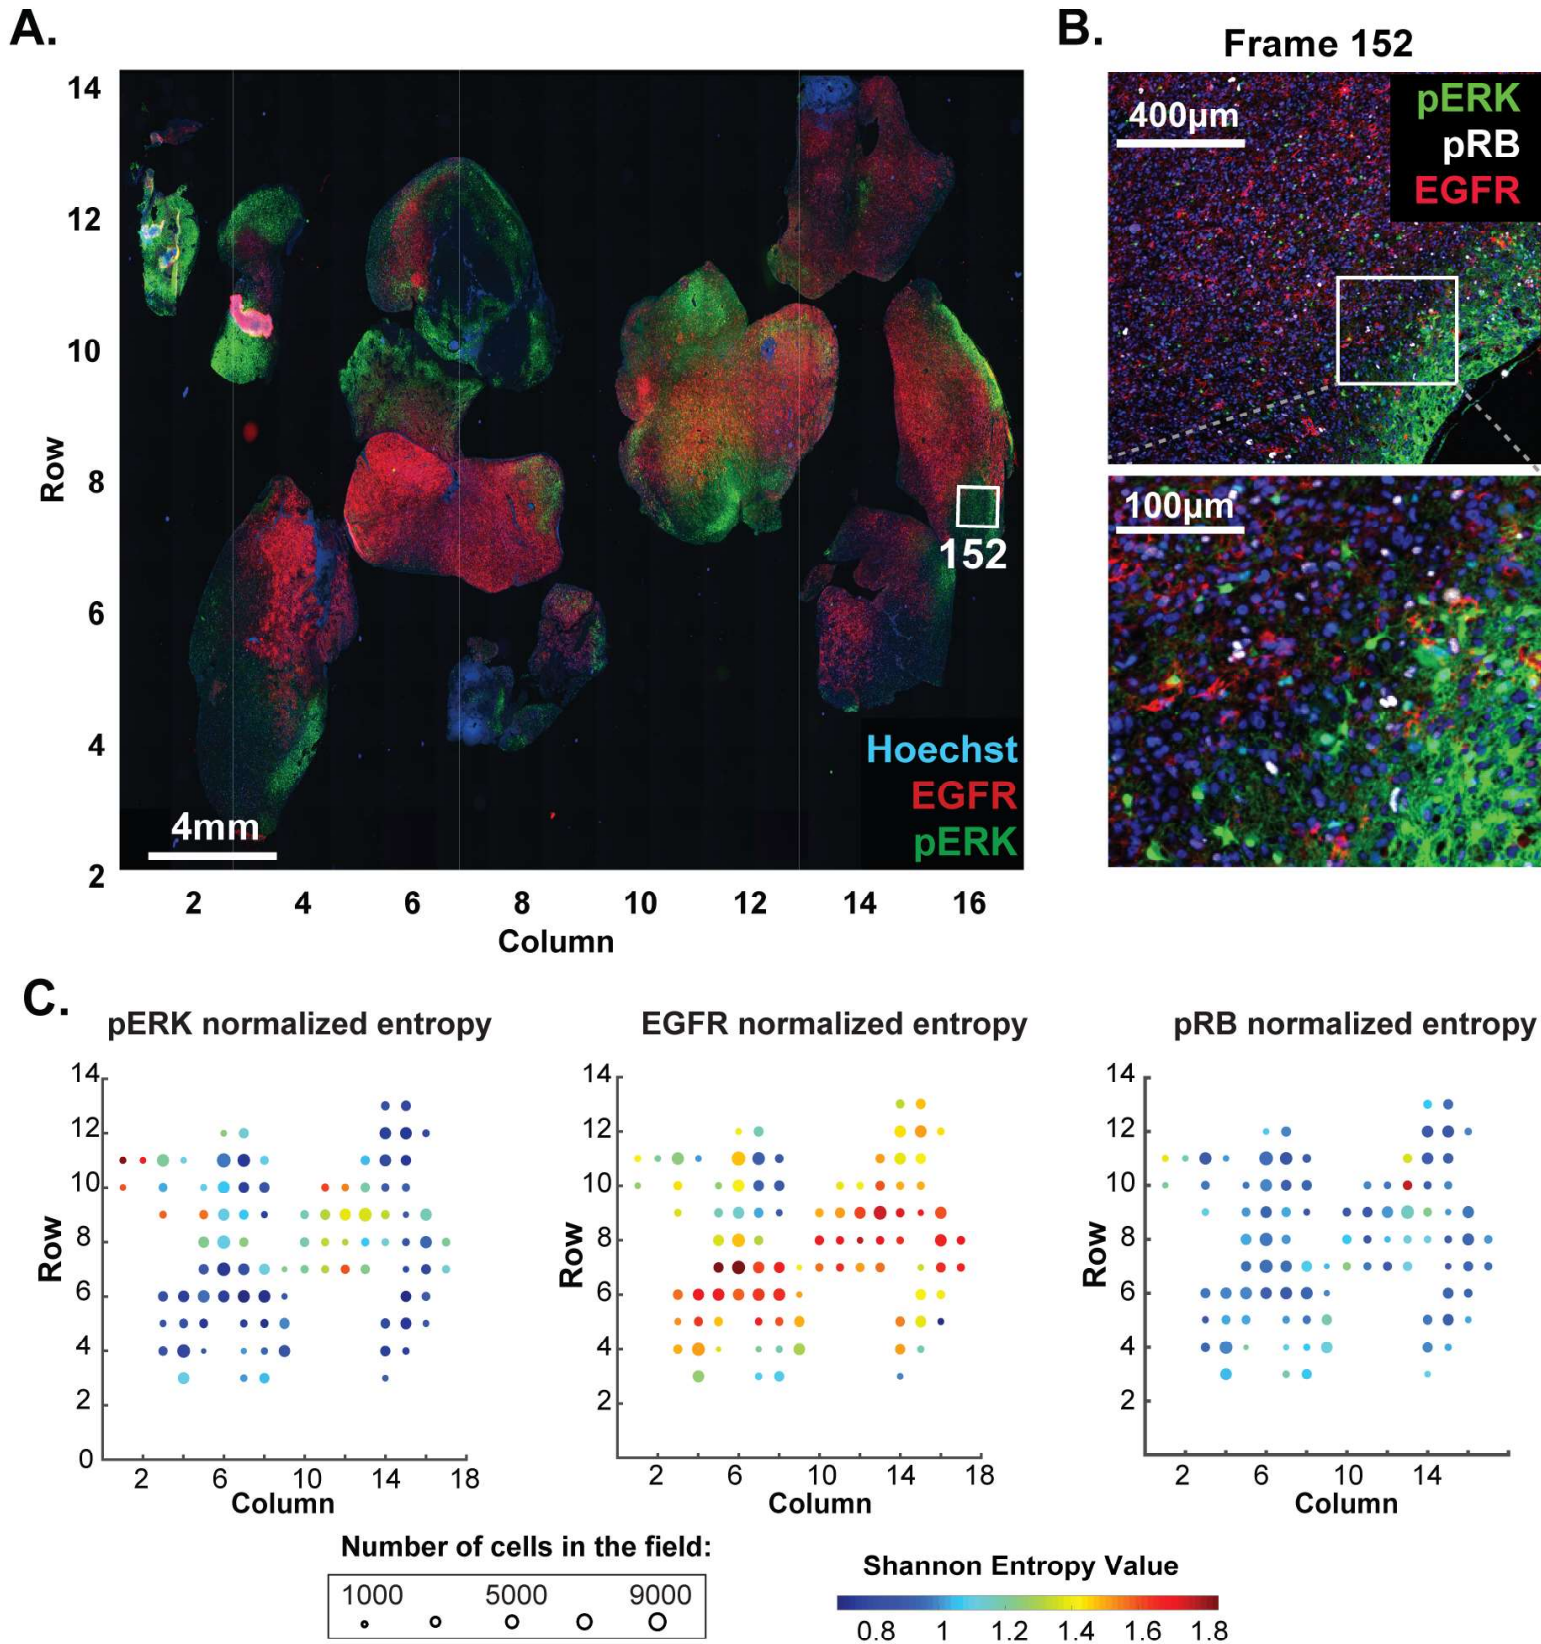

Figure 12

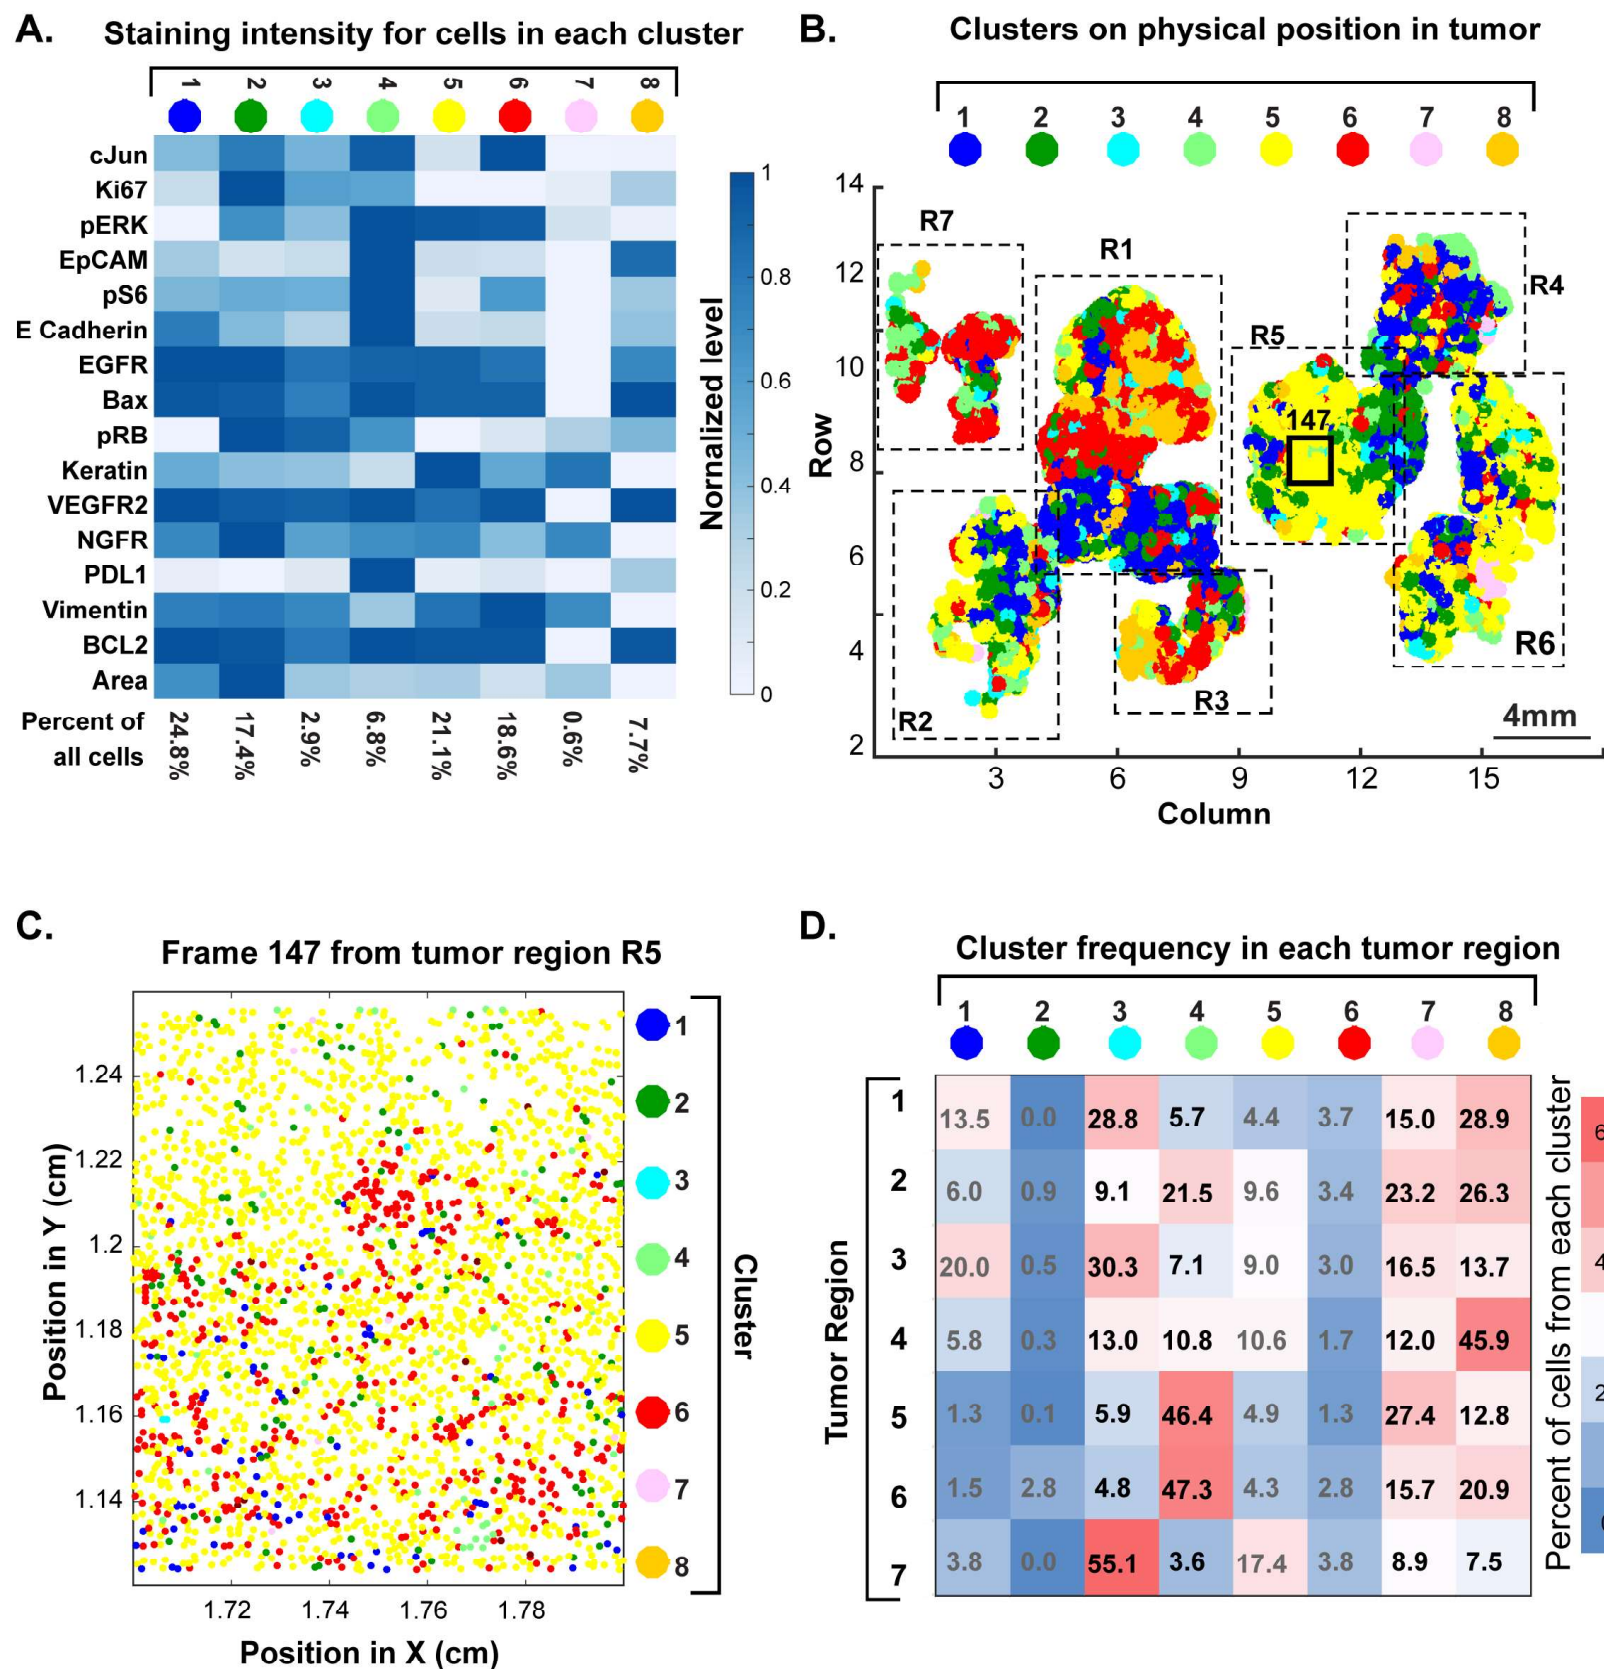

## Figure 1-figure supplement 1

**A.**

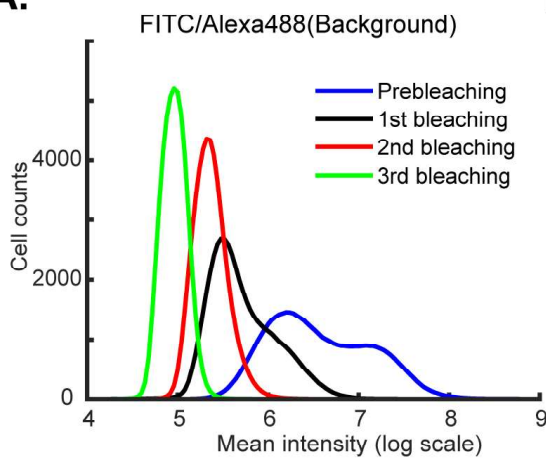

**B.**

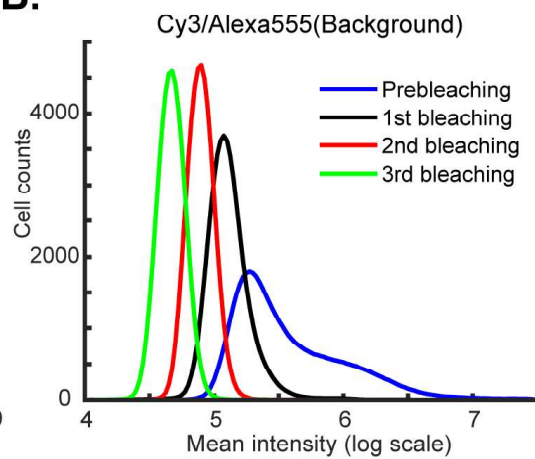

**C.**

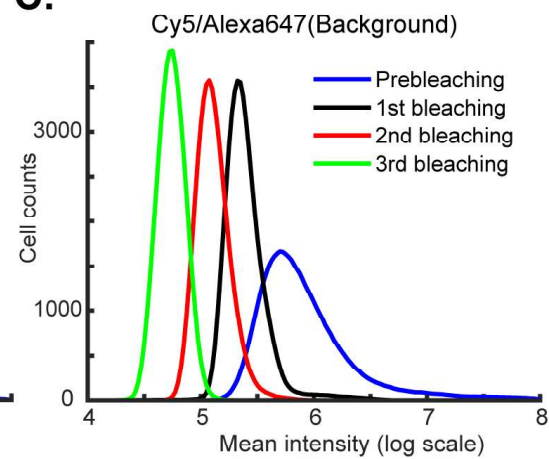

## Figure 1-figure supplement 2

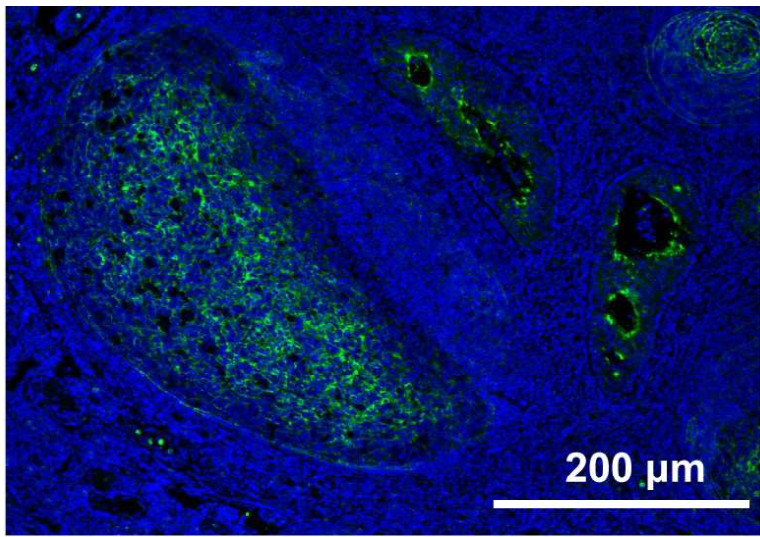

**anti-CD11b primary antibody  
anti-rabbit secondary antibody**

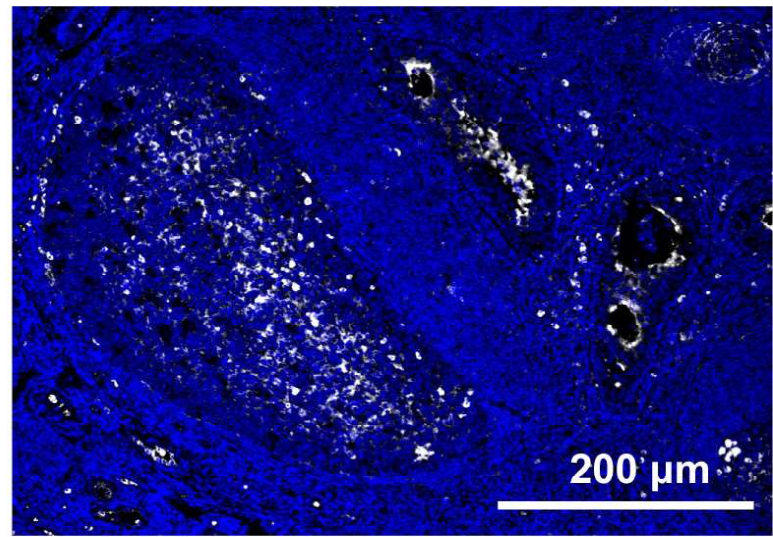

**anti-CD11b primary antibody pre-bound  
to Zenon Alexa-555 Fabs**

## Figure 2-figure supplement 1

Before Correction

After BaSiC correction

Hoechst 33342

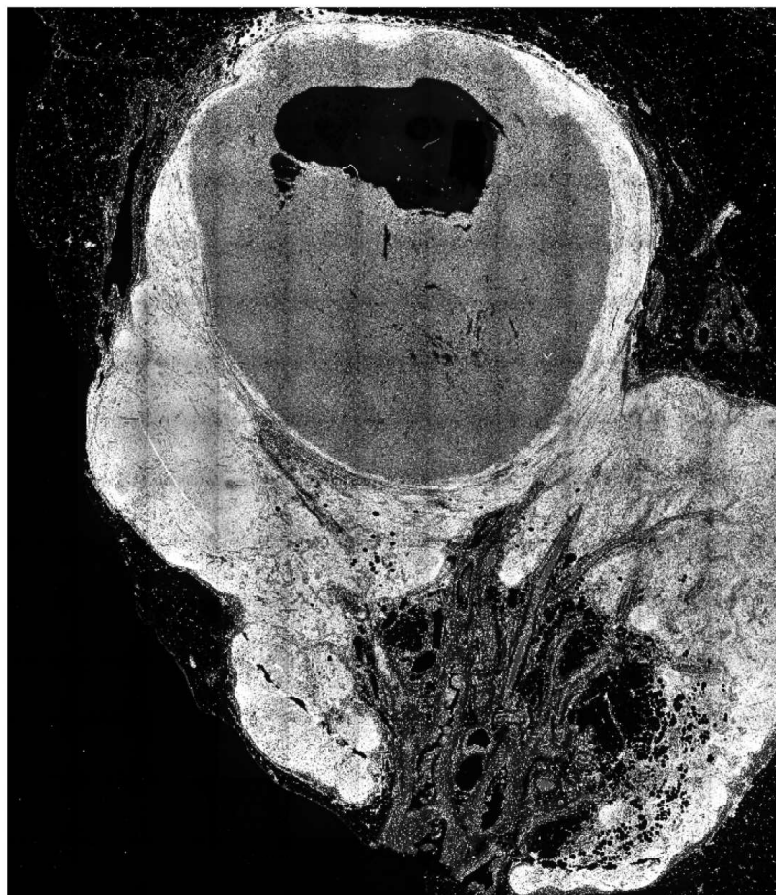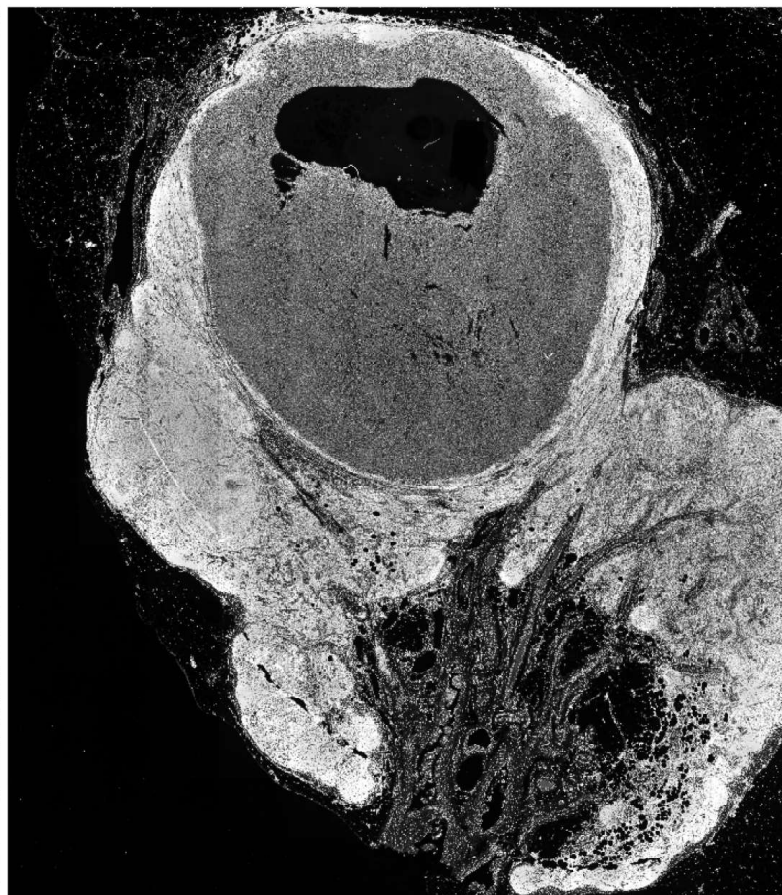

S100 (Alexa Fluor 488)

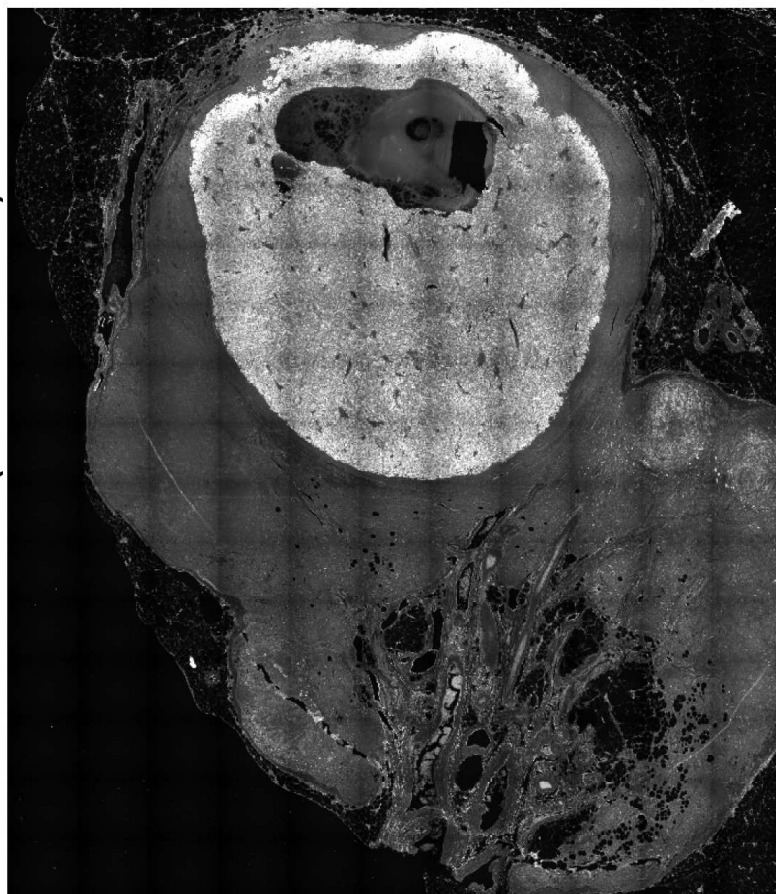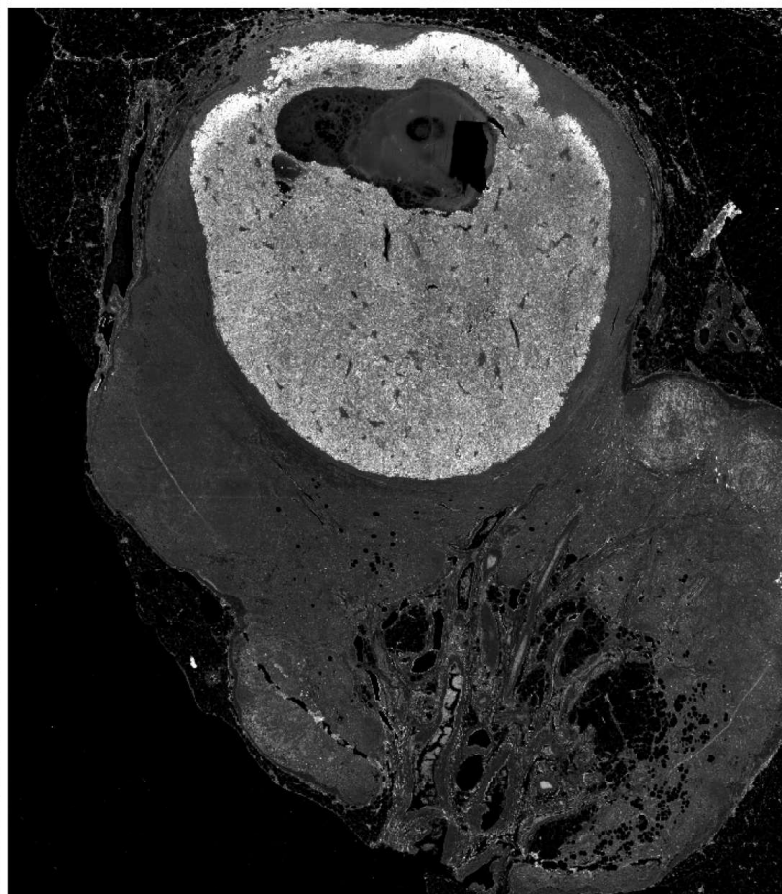

**A.**

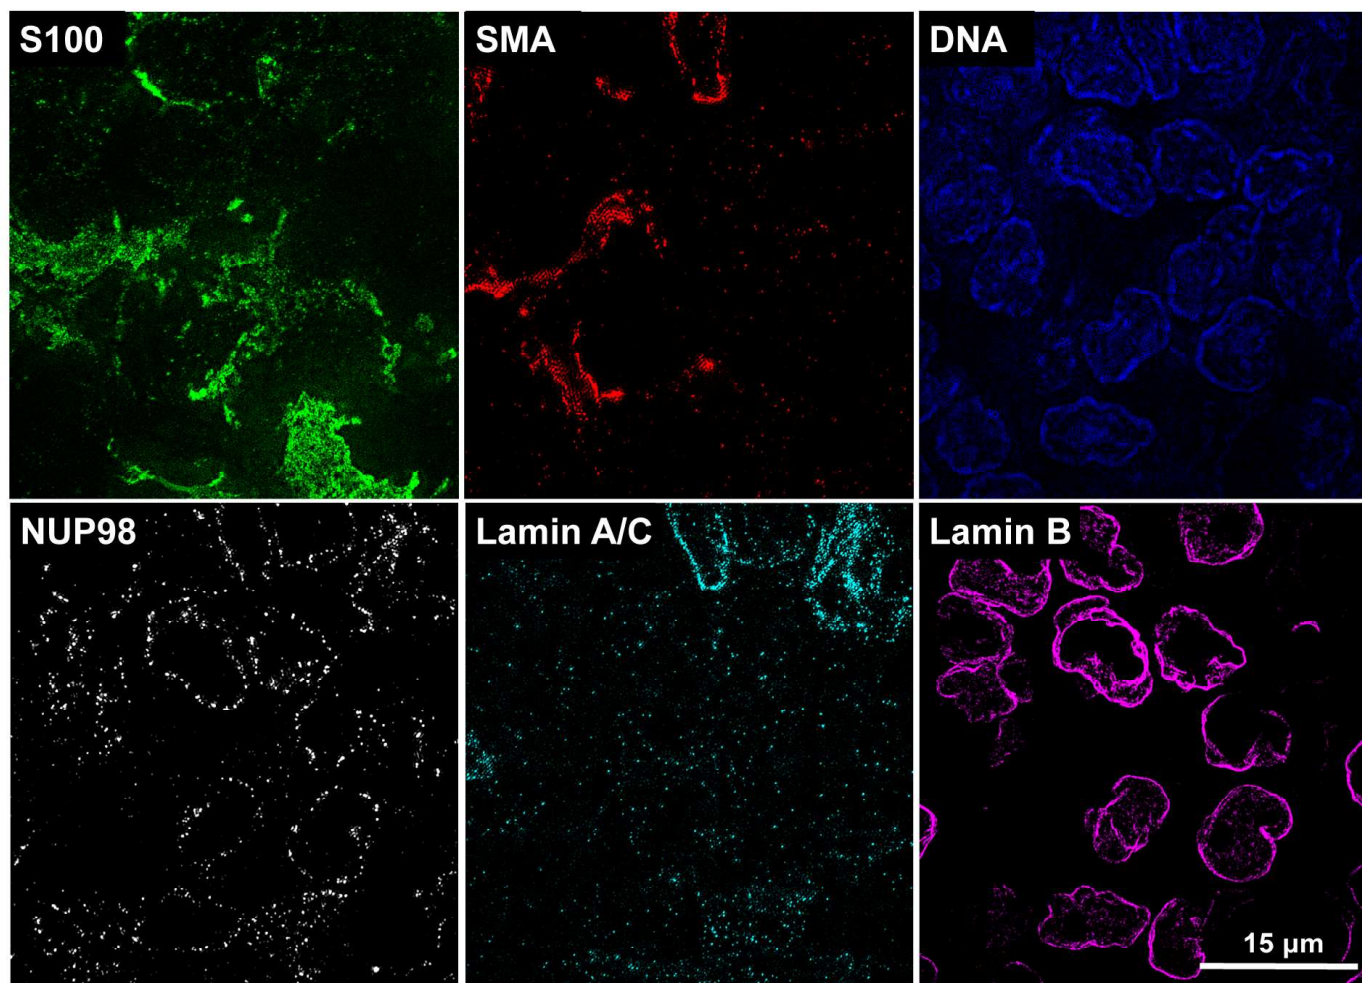

**B.**

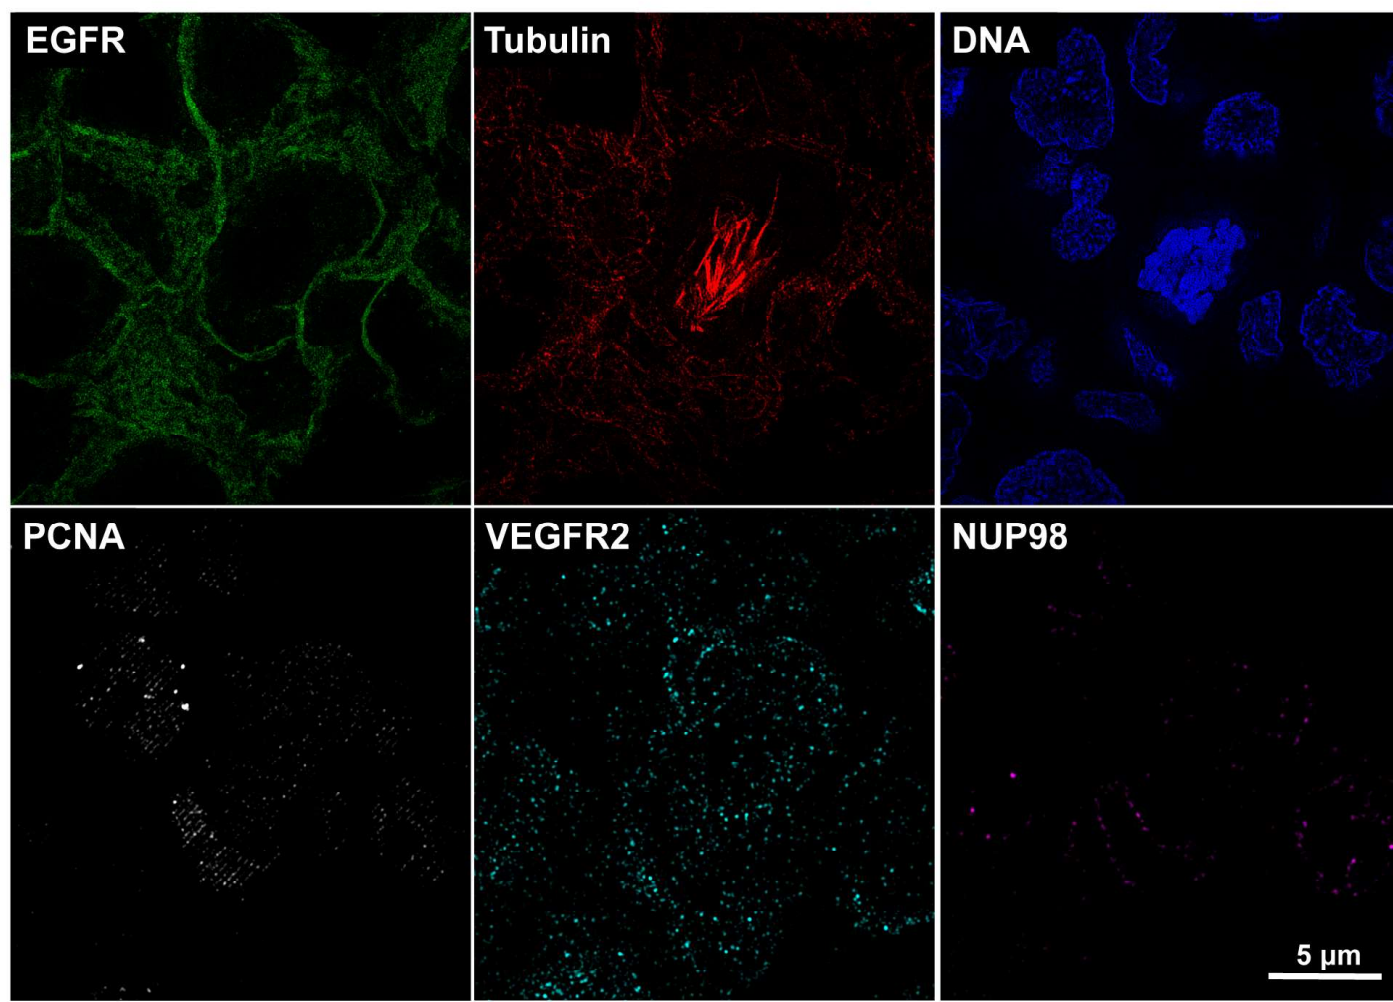

**Figure 4-figure supplement 1**

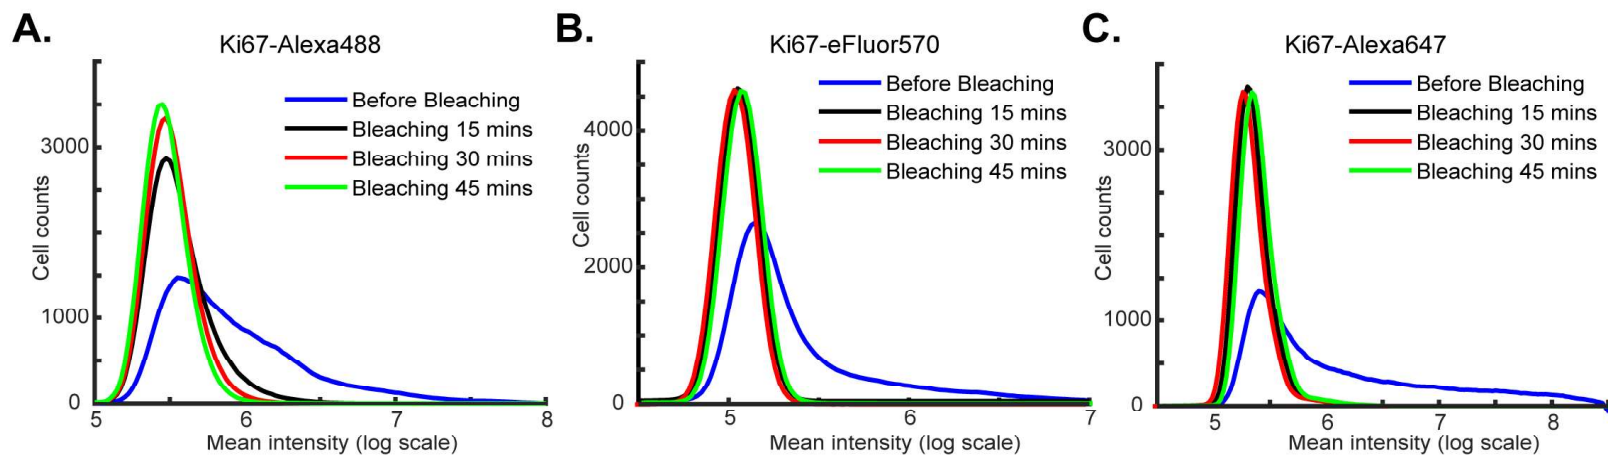

# Figure 6-figure supplement 1

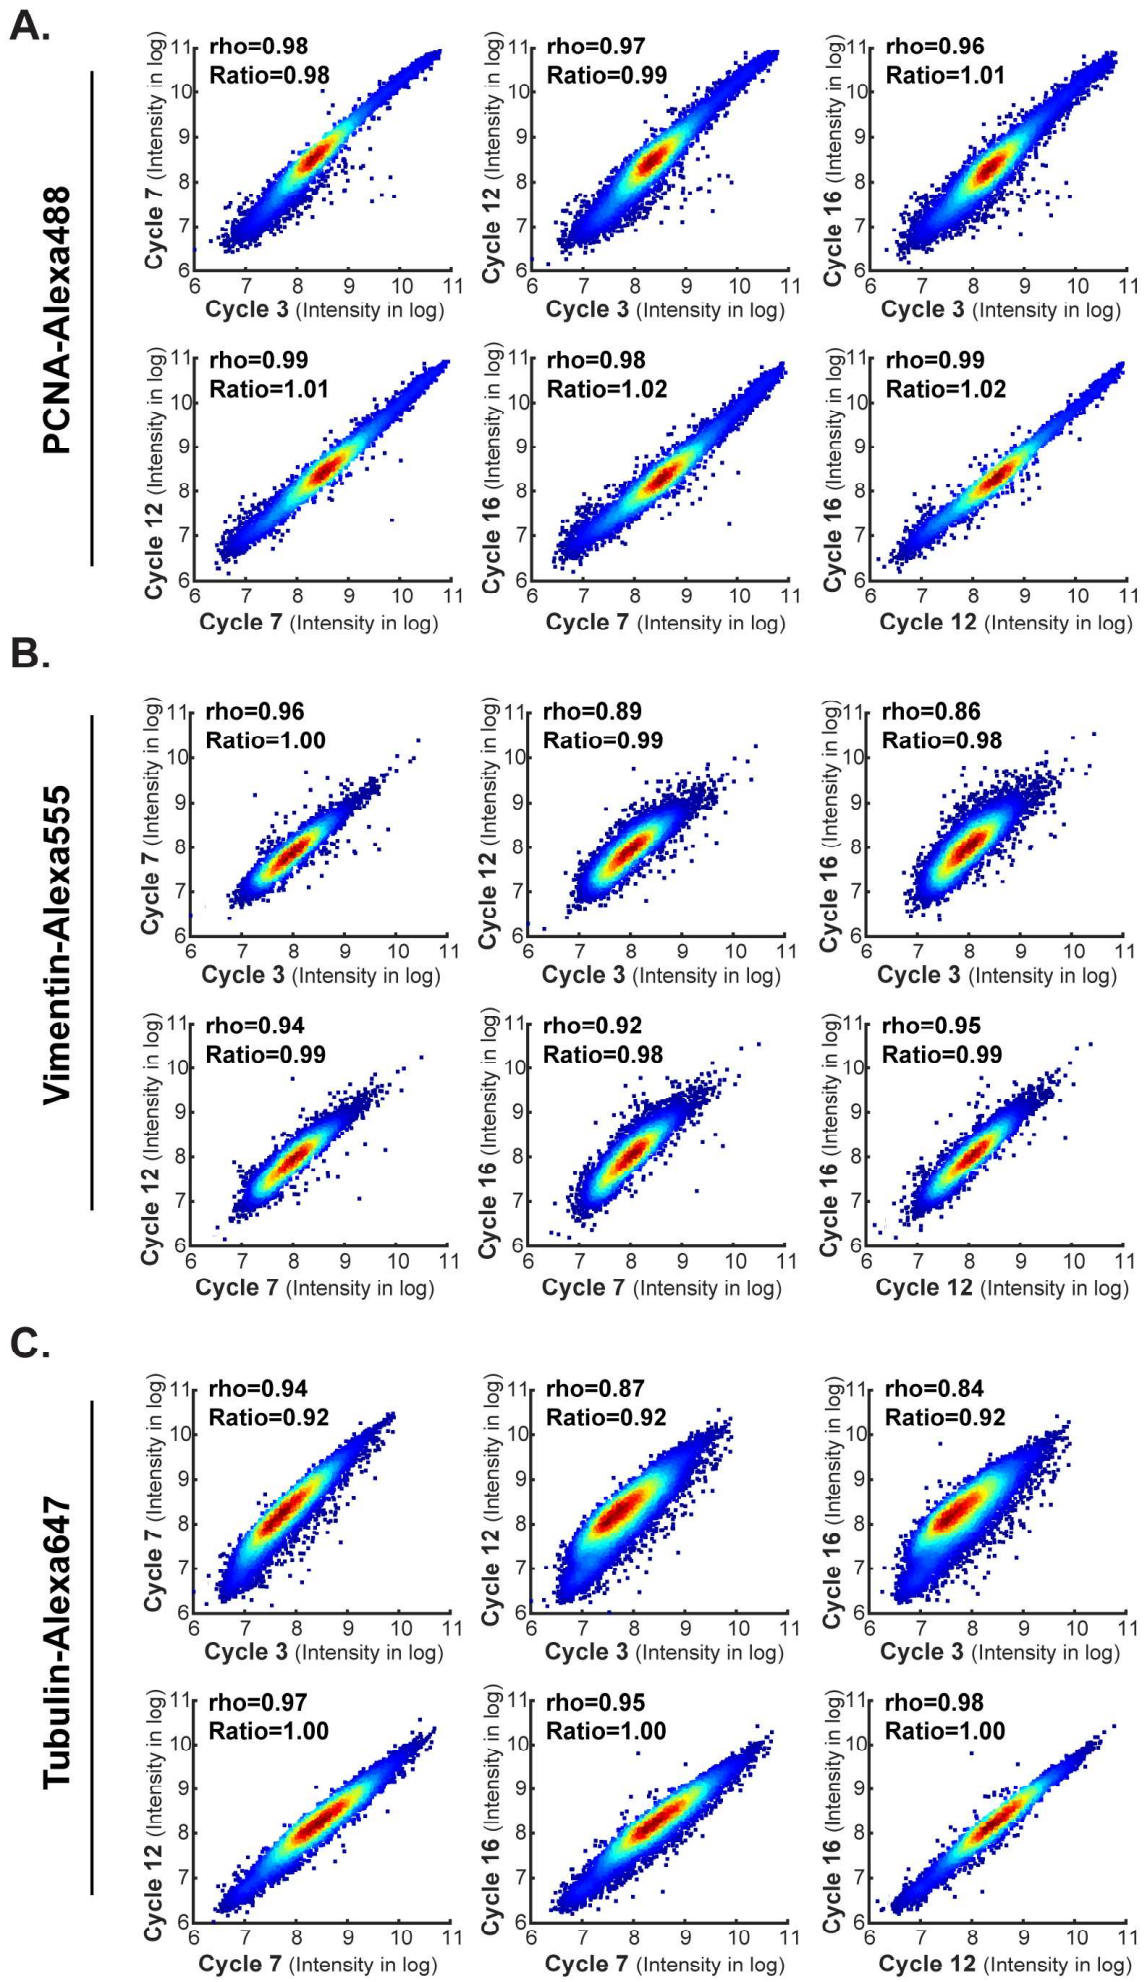

## Figure 7-figure supplement 1

**A.**

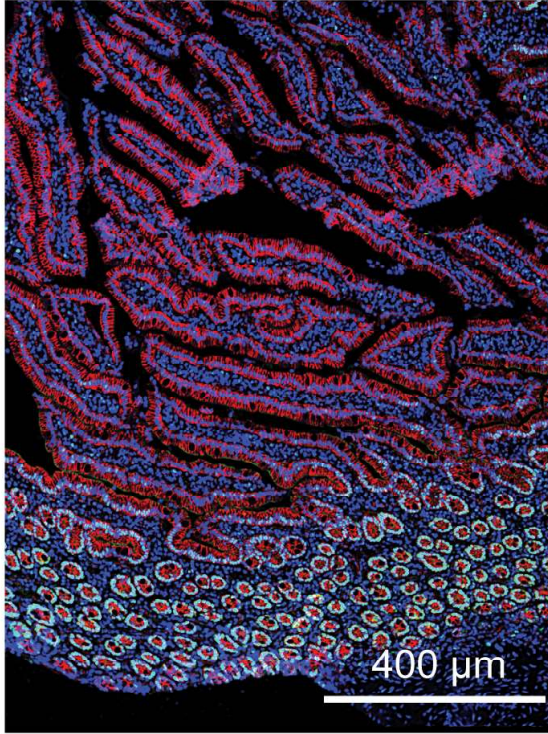

Green: PCNA  
Red:  $\beta$ -Catenin

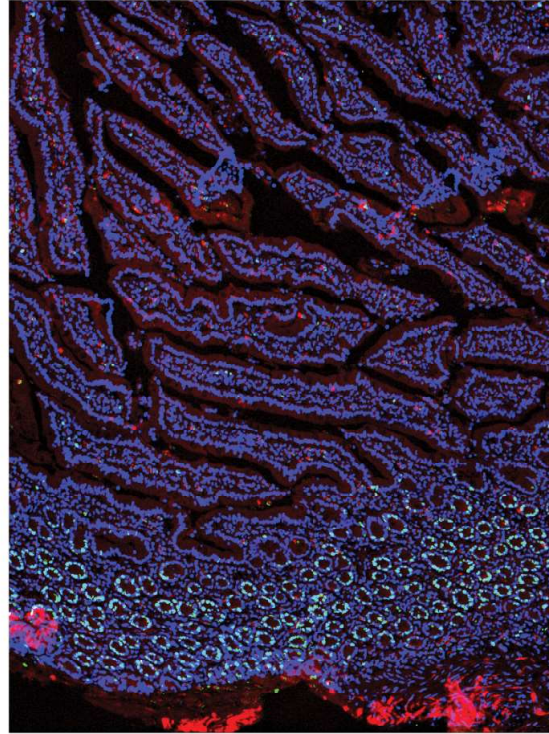

Green: Ki67  
Red: pERK

**B.**

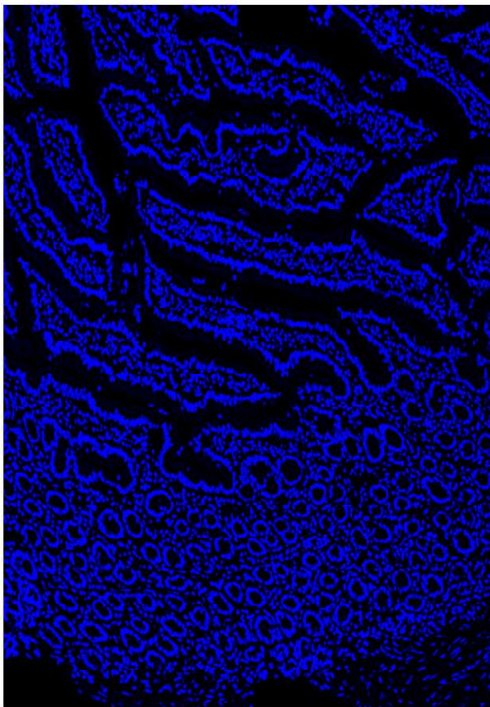

Hoechst stain (cycle 1)

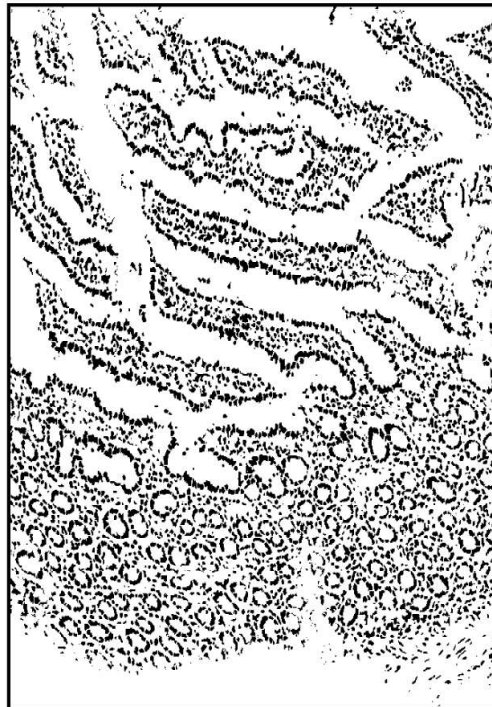

Nuclear Mask (cycle 8)

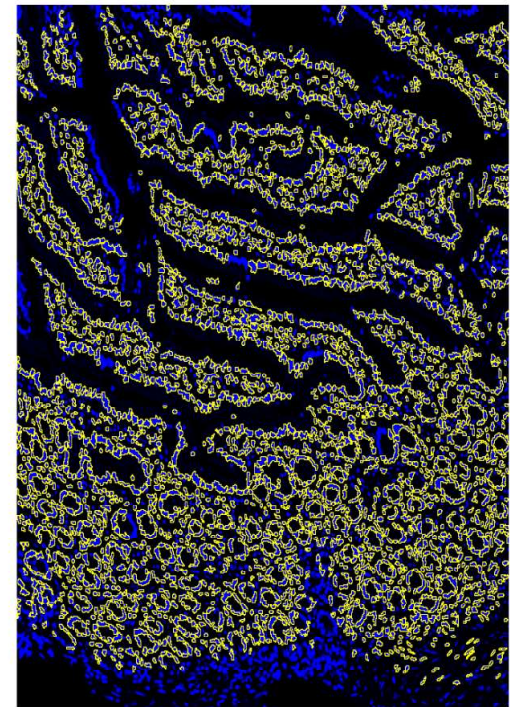

Overlay

## Figure 9-figure supplement 1

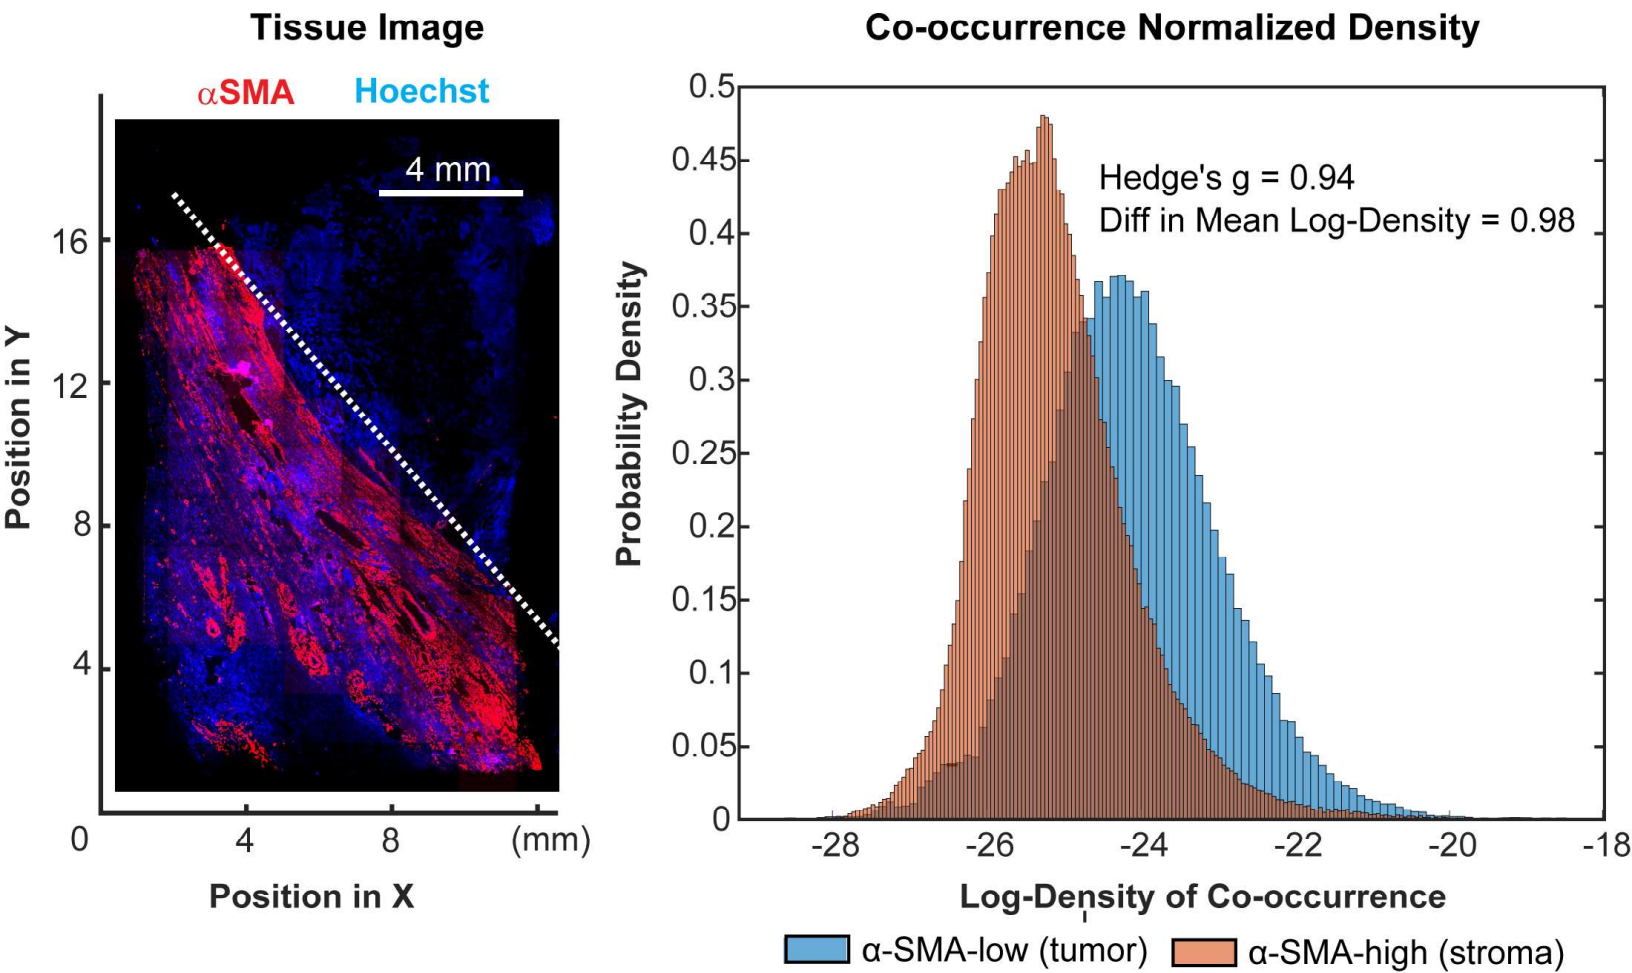

**A. Normal Kidney**

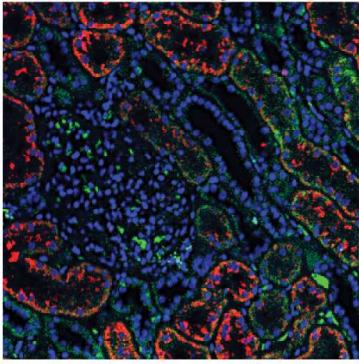

Green: Ki67  
Red: p21

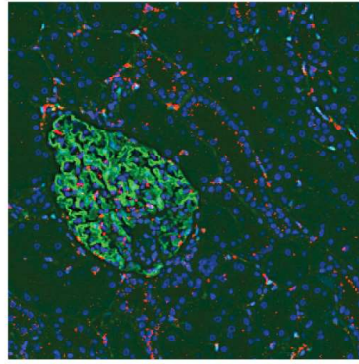

Green: p-ERK  
Red: p-S6(235/236)

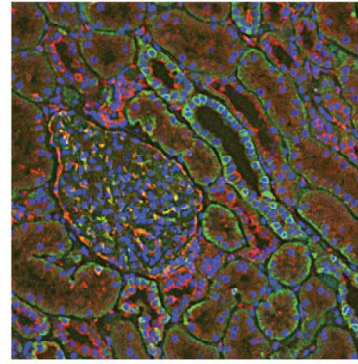

Green: EGFR  
Red: VEGFR2

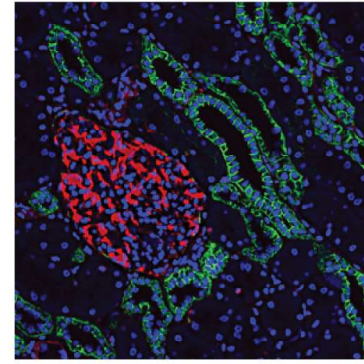

Green: E-Cadherin  
Red: Vimentin

**B. Breast Invasive tubular mixed carcinoma**

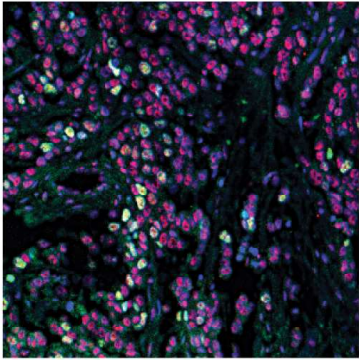

Green: Ki67  
Red: p-CTD(S2)

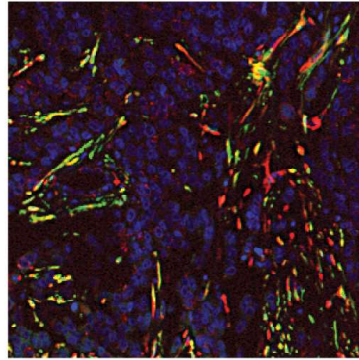

Green: p-ERK  
Red: p-S6(235/236)

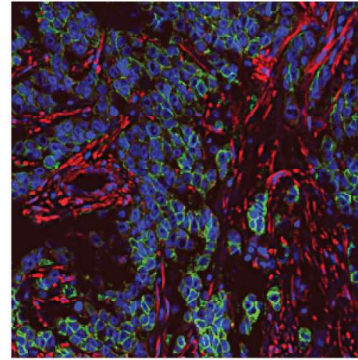

Green: EGFR  
Red: VEGFR2

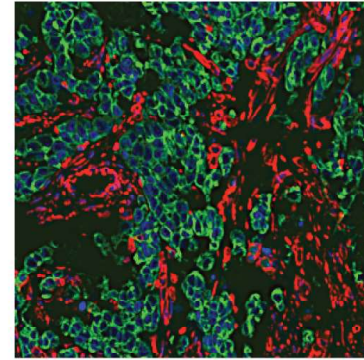

Green: Keratin  
Red: Vimentin

**C. Lymph node (Reactive)**

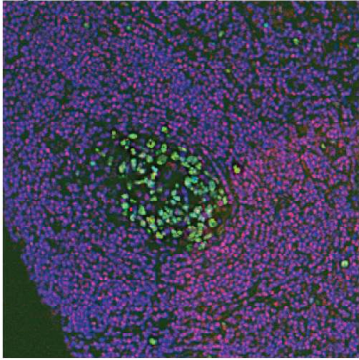

Green: Ki67  
Red: p-CTD(S2)

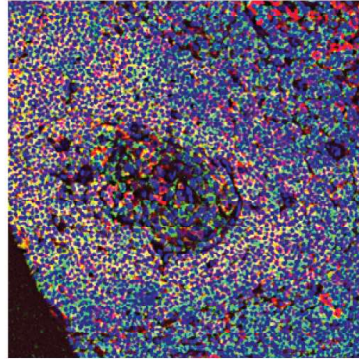

Green: CD45  
Red: pS6(235/236)

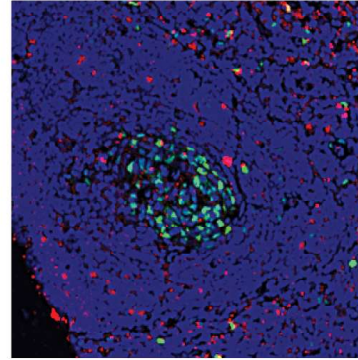

Green: PCNA  
Red: PD-L1

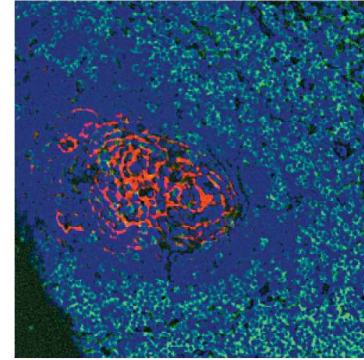

Green: CD4  
Red: NGFR

**D. Melanoma, grade II**

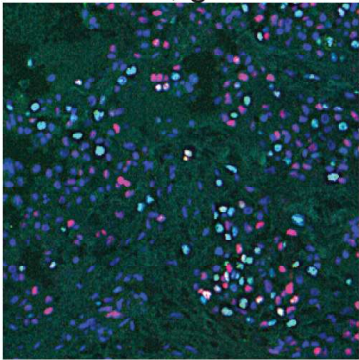

Green: Ki67  
Red: p21

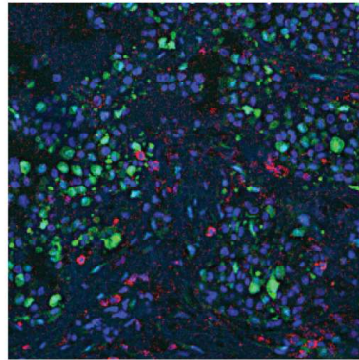

Green: p-ERK  
Red: CD45

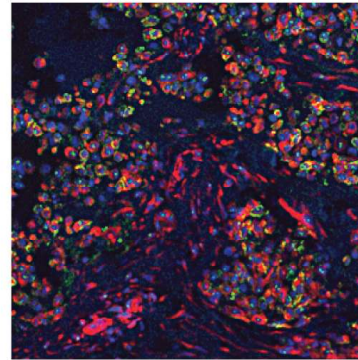

Green: E-Cadherin  
Red: Vimentin

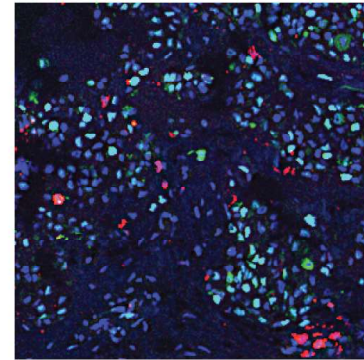

Green: PCNA  
Red: PD-L1

# Figure 12-figure supplement 1

## Successive Likelihood Improvement for Additional Cluster

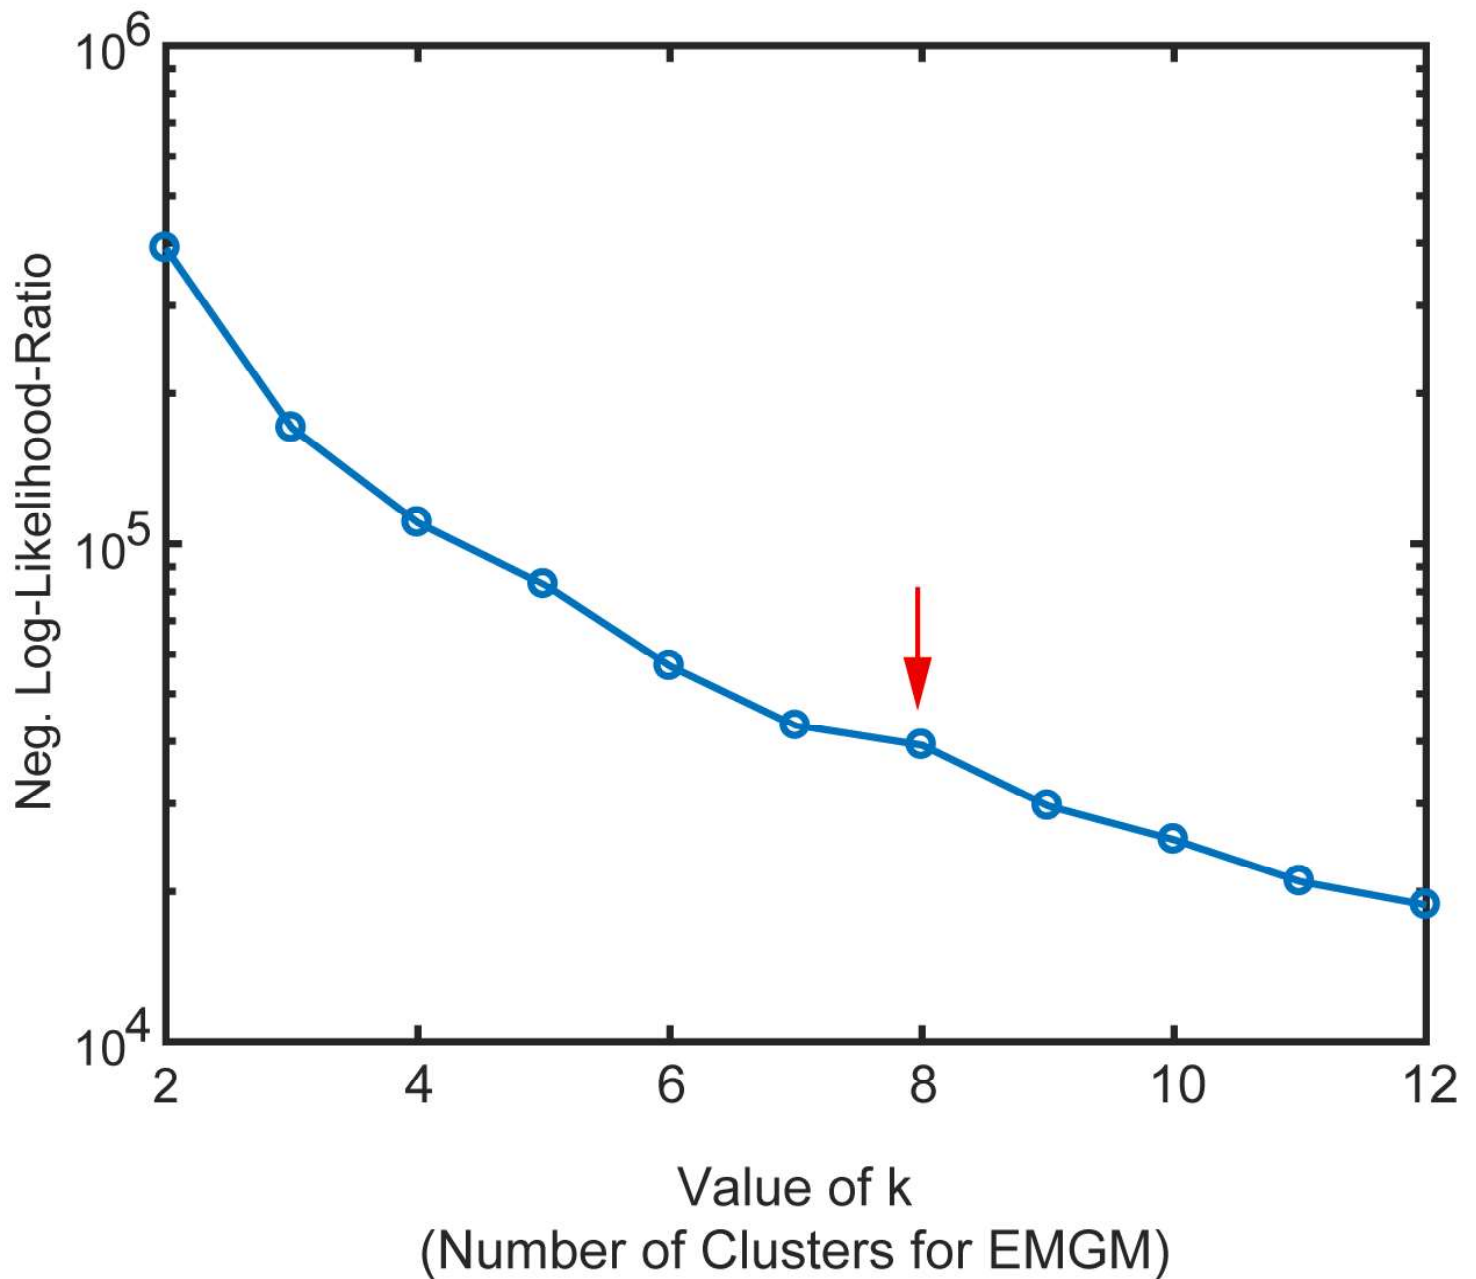

Figure 12-figure supplement 2

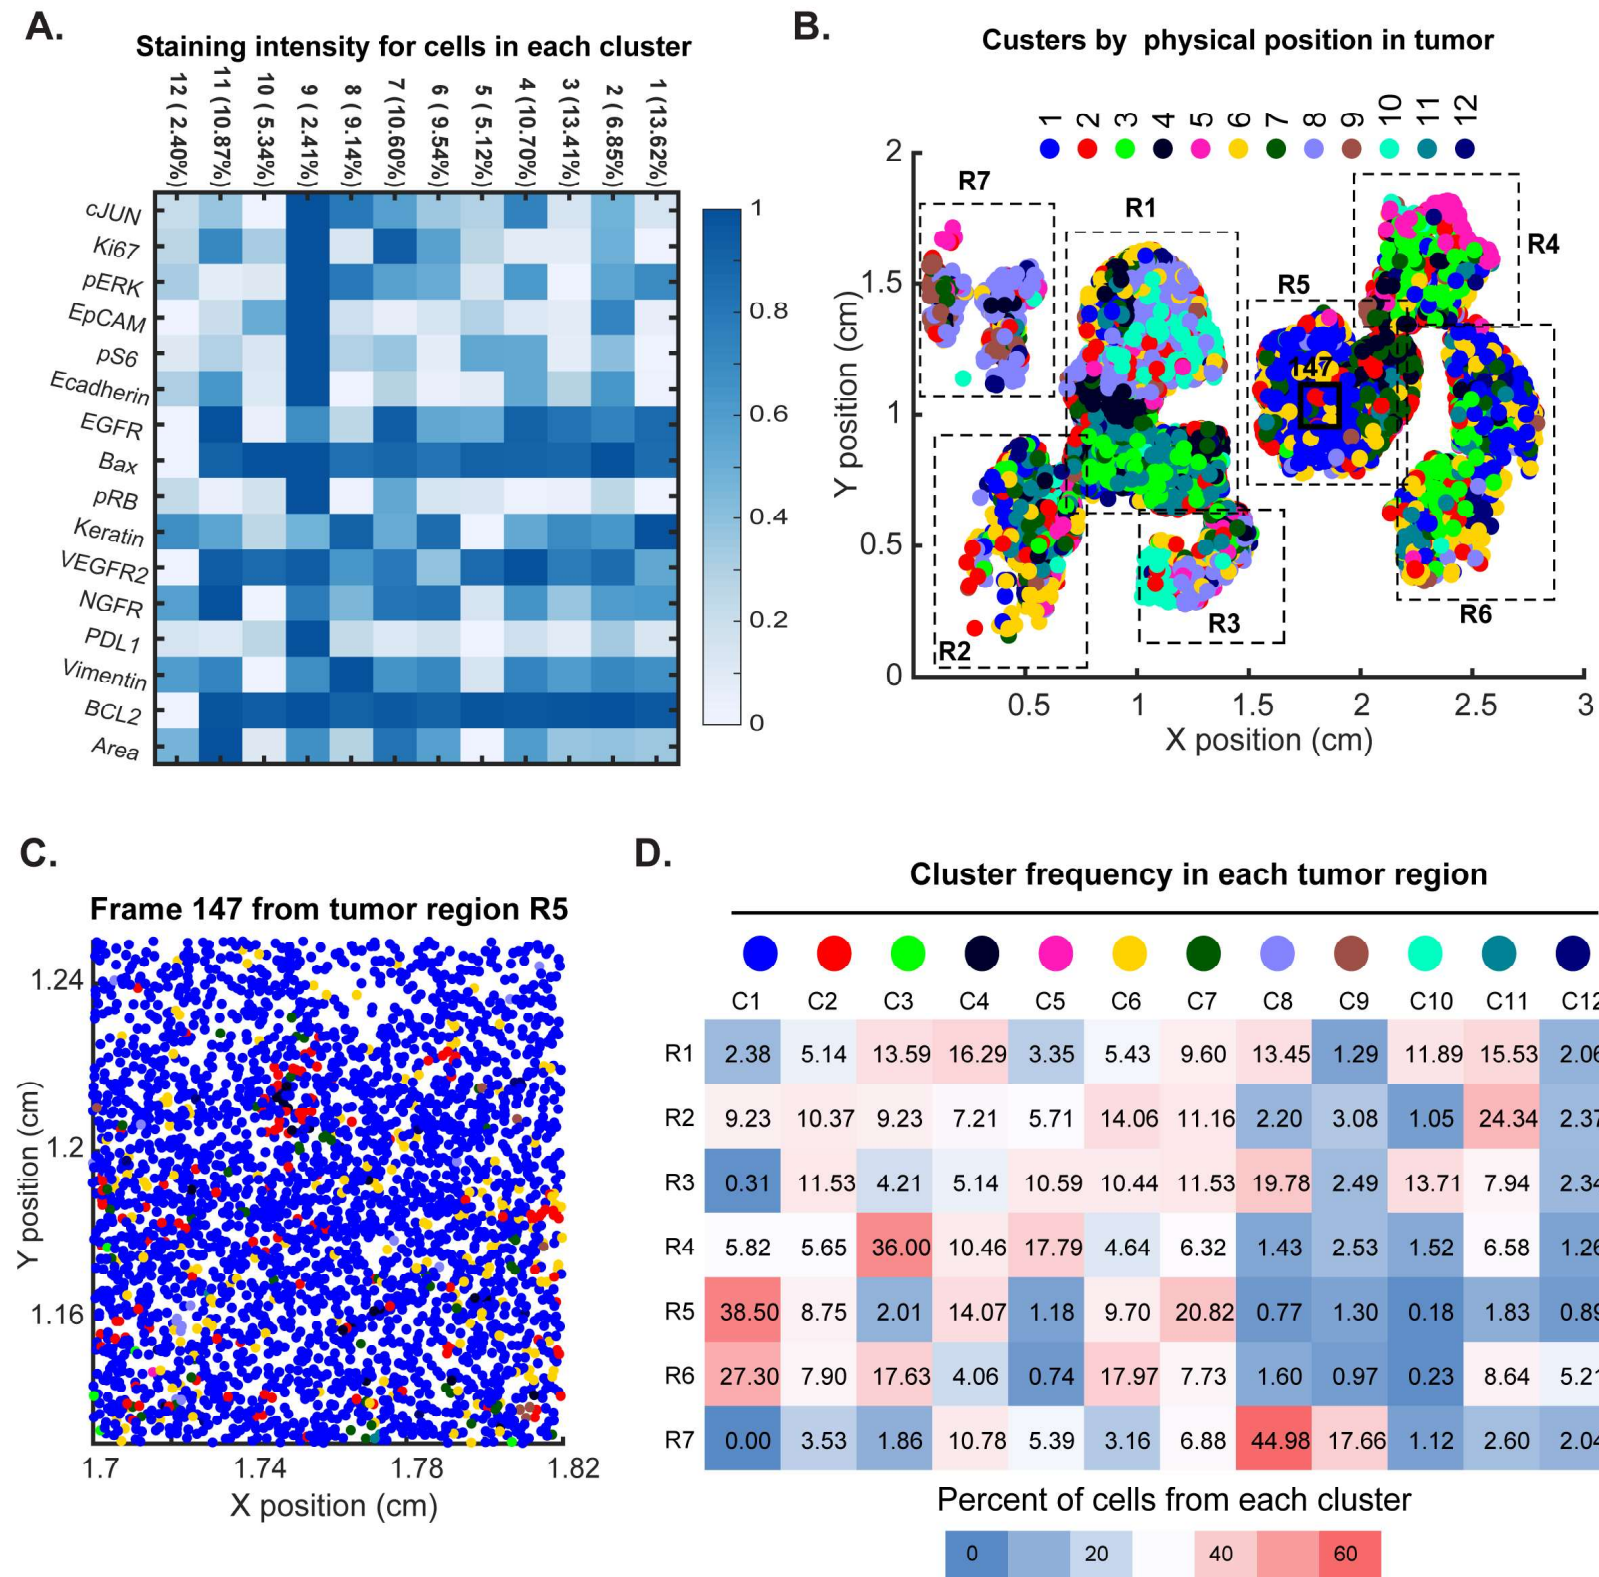

Source: http://biorxiv.org/content/10.1101/151738v2.full.pdf
